# Supplementary material for: Patient-reported outcomes and target effect sizes in pragmatic randomized trials in ClinicalTrials.gov: A cross-sectional analysis
Source: PLoS Med. 2022 Feb 8;19(2):e1003896. doi: 10.1371/journal.pmed.1003896 (PMC8824332; doi:10.1371/journal.pmed.1003896)
Supplement: S1 Data — (CSV) [file pmed.1003896.s006.csv]

Covidence_ID	Pub_Year	Journal	Impact Factor	Pediatric trial (18 years and under only)	Seniors trial (65+ only)	ct_primary_purpose	ct_intervention	Country of study recruitment	Area of focus	Trial design (unit of randomization)	Primary outcome clearly identified?	pro8. PROs as outcomes?	pro9. If two co-primaries: mix of PRO and clinical?	SS determined by PRO MCID	pro10. Type of PRO (primary)?	pro11. Secondary PRO type	pro12. Justification for including PRO?	pro13. Patient or public engagement?	pro14. Other stakeholder engagement?	pro15. SS calculation/justification?	pro17. Method for SS calculation	pro17. Important or realistic?	pro18. If mixture, which outcome SS calc based on?	pro18.2 Target Diff	pro20. SS calc adjust for attrition?	pro23. Study funder?	pro24. Superiority or non-inferiority?	pro25. Bayesian or Freq
12418	2015	Asia-Pacific Journal of Public Health	1.743	Missing data	Missing data	Treatment	Directly observed home based daily iron therapy, Drug	f. Low or Middle Income Country (LMIC)	b. Public health	b. Cluster randomized trial	1. Yes, one primary	2. Yes - PRO is secondary (not primary outcome)	3. NA - trial does not have multiple co-primary outcomes		7. NA - PROs not primary	3. Symptoms/symptom burden	6. NA - trial does not have PROs as primary outcome(s)	1. Yes	2. No	1. Yes, for (co)primary	10. Target difference not justified	N/A or unclear	4. NA		2. No	"2. Government, international agency, university"	Superiority	Frequentist
14566	2014	British Journal of Clinical Pharmacology	3.867	No	No	Treatment	control, Behavioral; pharmaceutical care intervention, Behavioral	d. Other European Union (EU) country	a. Clinical	a. Individually randomized trial (Skip Q12)	2. Yes, two co-primaries	2. Yes - PRO is secondary (not primary outcome)	2. No		7. NA - PROs not primary	1. HRQoL or QoL,3. Symptoms/symptom burden,4. Health behaviours	6. NA - trial does not have PROs as primary outcome(s)	2. No	2. No	1. Yes, for (co)primary	10. Target difference not justified	N/A or unclear	4. NA		1. Yes	1. Industry,"2. Government, international agency, university"	Superiority	Frequentist
14322	2014	Addiction	6.851	No	No	Prevention	Online screening and feedback, Behavioral; Online booklet., Behavioral; Online multi session follow-up, Behavioral	g. Other developed	b. Public health	a. Individually randomized trial (Skip Q12)	1. Yes, one primary	1. Yes - PRO is primary or co-primary outcome	3. NA - trial does not have multiple co-primary outcomes	Yes	4. Health behaviours	7. NA - PROs not secondary	4. No	2. No	2. No	1. Yes, for (co)primary	4. Standardized effect size	N/A or unclear	4. NA		2. No	"2. Government, international agency, university"	Superiority	Frequentist
13711	2014	Lancet	59.102	No	No	Health Services Research	The LCP-I Program, Other	d. Other European Union (EU) country	a. Clinical	b. Cluster randomized trial	1. Yes, one primary	1. Yes - PRO is primary or co-primary outcome	3. NA - trial does not have multiple co-primary outcomes	Yes	5. Patient experience	2. Functional status,3. Symptoms/symptom burden,5. Patient experience	4. No	2. No	2. No	1. Yes, for (co)primary	10. Target difference not justified	N/A or unclear	4. NA		2. No	"2. Government, international agency, university","3. Foundation, special interest group"	Superiority	Frequentist
14109	2014	International Journal of Clinical Practice	2.613	No	No	Treatment	anti spasmodic agents, Drug; alverine citrate, simeticone, Drug	d. Other European Union (EU) country	a. Clinical	b. Cluster randomized trial	1. Yes, one primary	1. Yes - PRO is primary or co-primary outcome	3. NA - trial does not have multiple co-primary outcomes		1. HRQoL or QoL	3. Symptoms/symptom burden,1. HRQoL or QoL	4. No	2. No	2. No	1. Yes, for (co)primary	10. Target difference not justified	N/A or unclear	4. NA	0.3	1. Yes	1. Industry	Superiority	Frequentist
14420	2014	Lancet Oncology	35.386	No	No	Treatment	imiquimod, Drug; conventional surgery, Procedure	c. UK	a. Clinical	a. Individually randomized trial (Skip Q12)	1. Yes, one primary	2. Yes - PRO is secondary (not primary outcome)	3. NA - trial does not have multiple co-primary outcomes		7. NA - PROs not primary	3. Symptoms/symptom burden	6. NA - trial does not have PROs as primary outcome(s)	1. Yes	2. No	1. Yes, for (co)primary	5. Stakeholder/patient opinion	important	4. NA		2. No	"2. Government, international agency, university"	Non-inferiority	Frequentist
14452	2014	American Journal of Preventive Medicine	4.435	Yes	No	Health Services Research	School based flu vaccine: Low intensity, Behavioral; School based flu vaccine: High intensity, Behavioral	b. USA	b. Public health	b. Cluster randomized trial	1. Yes, one primary	3. No - There are no PROs	3. NA - trial does not have multiple co-primary outcomes		7. NA - PROs not primary	7. NA - PROs not secondary	6. NA - trial does not have PROs as primary outcome(s)	2. No	2. No	1. Yes, for (co)primary	10. Target difference not justified	N/A or unclear	4. NA		2. No	"2. Government, international agency, university"	Superiority	Frequentist
14494	2014	Family Practice	1.986	No	No	Health Services Research	Nurse-led blood pressure clinic, Other	c. UK	a. Clinical	a. Individually randomized trial (Skip Q12)	1. Yes, one primary	3. No - There are no PROs	3. NA - trial does not have multiple co-primary outcomes		7. NA - PROs not primary	7. NA - PROs not secondary	6. NA - trial does not have PROs as primary outcome(s)	2. No	2. No	1. Yes, for (co)primary	9. Calculated the detectable difference given sample size	realistic	4. NA		2. No	"2. Government, international agency, university"	Superiority	Frequentist
14528	2014	Acta Neurologica Scandinavica	2.852	No	No	Treatment	Placebo, Drug; 2400mg SPN-804, Drug; 1200mg SPN-804, Drug	a. Canada ,b. USA ,d. Other European Union (EU) country ,g. Other developed	a. Clinical	a. Individually randomized trial (Skip Q12)	1. Yes, one primary	1. Yes - PRO is primary or co-primary outcome	3. NA - trial does not have multiple co-primary outcomes		3. Symptoms/symptom burden	7. NA - PROs not secondary	4. No	2. No	2. No	1. Yes, for (co)primary	7. Pilot study or realistic difference	realistic	4. NA		2. No	1. Industry	Superiority	Frequentist
13784	2014	Stroke	6.046	No	No	Prevention	Aspirin / Clopidogrel, Atorvastatin / Simvastatin, Drug; Asprin / Clopidogrel, Atorvastatin / Simvastatin, Drug	f. Low or Middle Income Country (LMIC)	a. Clinical	b. Cluster randomized trial	4. No or unclear	3. No - There are no PROs	2. No		7. NA - PROs not primary	7. NA - PROs not secondary	6. NA - trial does not have PROs as primary outcome(s)	2. No	2. No	2. Yes, but not for (co)primary	10. Target difference not justified	N/A or unclear	4. NA		1. Yes	"2. Government, international agency, university"	Superiority	Frequentist
13634	2014	Pediatrics	5.401	Yes	No	Prevention	Xylitol syrup, Drug; Placebo, Drug	b. USA	a. Clinical	a. Individually randomized trial (Skip Q12)	1. Yes, one primary	3. No - There are no PROs	3. NA - trial does not have multiple co-primary outcomes		7. NA - PROs not primary	7. NA - PROs not secondary	6. NA - trial does not have PROs as primary outcome(s)	2. No	2. No	1. Yes, for (co)primary	10. Target difference not justified	N/A or unclear	4. NA		2. No	"2. Government, international agency, university",1. Industry	Superiority	Frequentist
14211	2014	Journal of Neurology, Neurosurgery & Psychiatry	8.272	No	No	Treatment	Standardized educational plan, Other; usual care, Other	d. Other European Union (EU) country	a. Clinical	a. Individually randomized trial (Skip Q12)	1. Yes, one primary	1. Yes - PRO is primary or co-primary outcome	3. NA - trial does not have multiple co-primary outcomes	Yes	3. Symptoms/symptom burden	1. HRQoL or QoL,3. Symptoms/symptom burden	4. No	2. No	2. No	1. Yes, for (co)primary	7. Pilot study or realistic difference	realistic	4. NA		2. No	"2. Government, international agency, university"	Superiority	Frequentist
13776	2014	Pain	6.029	No	No	Supportive Care	SCION (Self care improvement through oncology nursing)-PAIN program, Behavioral	d. Other European Union (EU) country	a. Clinical	b. Cluster randomized trial	1. Yes, one primary	1. Yes - PRO is primary or co-primary outcome	3. NA - trial does not have multiple co-primary outcomes		6. Other (specify)	1. HRQoL or QoL,2. Functional status,3. Symptoms/symptom burden,4. Health behaviours	1. Yes, lit citation or explanation	2. No	2. No	1. Yes, for (co)primary	10. Target difference not justified	N/A or unclear	4. NA	0.57	1. Yes	"2. Government, international agency, university"	Superiority	Frequentist
14281	2014	Lancet Oncology	35.386	No	No	Treatment	chemotherapy, Drug; radiation therapy, Radiation	a. Canada ,b. USA ,e. Australia or New Zealand,d. Other European Union (EU) country ,g. Other developed	a. Clinical	a. Individually randomized trial (Skip Q12)	1. Yes, one primary	3. No - There are no PROs	3. NA - trial does not have multiple co-primary outcomes		7. NA - PROs not primary	7. NA - PROs not secondary	6. NA - trial does not have PROs as primary outcome(s)	2. No	2. No	1. Yes, for (co)primary	10. Target difference not justified	N/A or unclear	4. NA		1. Yes	"2. Government, international agency, university","3. Foundation, special interest group"	Superiority	Frequentist
14438	2014	American Journal of Preventive Medicine	4.435	No	No	Treatment	Electronic Referral, Other	b. USA	a. Clinical	b. Cluster randomized trial	4. No or unclear	1. Yes - PRO is primary or co-primary outcome	1. Yes		4. Health behaviours	7. NA - PROs not secondary	4. No	2. No	2. No	3. No	13. No SS calc	N/A or unclear	4. NA		4. NA - no sample size calculation	"2. Government, international agency, university"	Superiority	Frequentist
14136	2014	Addiction	6.851	No	No	Treatment	Brief Intervention, Behavioral	b. USA	a. Clinical	b. Cluster randomized trial	1. Yes, one primary	1. Yes - PRO is primary or co-primary outcome	3. NA - trial does not have multiple co-primary outcomes		4. Health behaviours	6. Other (specify)	4. No	2. No	2. No	2. Yes, but not for (co)primary	7. Pilot study or realistic difference	realistic	4. NA		1. Yes	"2. Government, international agency, university"	Superiority	Frequentist
14166	2014	Journal of Hepatology	18.946	No	No	Treatment	Naked Stents: Wallstent® (Boston Scientific), Luminexx® (Bard), Zilver® (Cook), Palmaz Genesis® and Smart Control® (Cordis), Device; PTFE Covered Stents: Fluency® (Bard), Advanta V12® (Atrium) and Viatorr® (Gore), Device; Transjugular intrahepatic portosystemic shunt (TIPS), Procedure	d. Other European Union (EU) country	a. Clinical	a. Individually randomized trial (Skip Q12)	1. Yes, one primary	2. Yes - PRO is secondary (not primary outcome)	3. NA - trial does not have multiple co-primary outcomes		7. NA - PROs not primary	1. HRQoL or QoL	6. NA - trial does not have PROs as primary outcome(s)	2. No	2. No	1. Yes, for (co)primary	7. Pilot study or realistic difference	realistic	4. NA		1. Yes	"2. Government, international agency, university"	Superiority	Frequentist
13901	2014	PLoS Medicine / Public Library of Science	11.048	No	No	Health Services Research	Toolkit, Other; Control, Other	a. Canada	a. Clinical	b. Cluster randomized trial	2. Yes, two co-primaries	3. No - There are no PROs	2. No		7. NA - PROs not primary	7. NA - PROs not secondary	6. NA - trial does not have PROs as primary outcome(s)	2. No	1. Yes	1. Yes, for (co)primary	6. Evidence review	realistic	4. NA		2. No	"2. Government, international agency, university","3. Foundation, special interest group"	Superiority	Frequentist
14043	2014	BMC Health Services Research	1.932	No	No	Health Services Research	Exposure to multi-disciplinary wound care team, Other	a. Canada	a. Clinical	b. Cluster randomized trial	1. Yes, one primary	2. Yes - PRO is secondary (not primary outcome)	3. NA - trial does not have multiple co-primary outcomes		7. NA - PROs not primary	3. Symptoms/symptom burden	6. NA - trial does not have PROs as primary outcome(s)	2. No	2. No	1. Yes, for (co)primary	5. Stakeholder/patient opinion	important	4. NA		1. Yes	"2. Government, international agency, university","3. Foundation, special interest group"	Superiority	Frequentist
14128	2014	Transactions of the Royal Society of Tropical Medicine & Hygiene	2.307	Yes	No	Prevention	Shoes, Device	f. Low or Middle Income Country (LMIC)	b. Public health	b. Cluster randomized trial	4. No or unclear	3. No - There are no PROs	3. NA - trial does not have multiple co-primary outcomes		7. NA - PROs not primary	7. NA - PROs not secondary	6. NA - trial does not have PROs as primary outcome(s)	2. No	2. No	1. Yes, for (co)primary	10. Target difference not justified	N/A or unclear	4. NA		2. No	1. Industry,"2. Government, international agency, university"	Superiority	Frequentist
14030	2014	JAMA Internal Medicine	20.768	No	No	Health Services Research	Proactive Outreach with choice of telephone or in-person smoking cessation services, Behavioral	b. USA	a. Clinical	a. Individually randomized trial (Skip Q12)	1. Yes, one primary	1. Yes - PRO is primary or co-primary outcome	3. NA - trial does not have multiple co-primary outcomes	Yes	4. Health behaviours	4. Health behaviours	4. No	2. No	2. No	1. Yes, for (co)primary	10. Target difference not justified	N/A or unclear	4. NA		2. No	"2. Government, international agency, university"	Superiority	Frequentist
14222	2014	Journal of Pediatrics	3.739	Yes	No	Treatment	T-piece resuscitator Neopuff TM, Device; Self Inflating Bag with PEEP, Device; Self Inflating Bag without PEEP, Device	b. USA ,d. Other European Union (EU) country ,f. Low or Middle Income Country (LMIC) ,g. Other developed	a. Clinical	b. Cluster randomized trial	1. Yes, one primary	3. No - There are no PROs	3. NA - trial does not have multiple co-primary outcomes		7. NA - PROs not primary	7. NA - PROs not secondary	6. NA - trial does not have PROs as primary outcome(s)	2. No	2. No	1. Yes, for (co)primary	7. Pilot study or realistic difference	realistic	4. NA		2. No	1. Industry,"2. Government, international agency, university","3. Foundation, special interest group"	Superiority	Frequentist
12881	2014	Diabetes, Obesity & Metabolism	6.133	No	No	Treatment	Insulin Lispro Low Mixture (LM), Drug; Insulin Glargine, Drug; Prandial Insulin Lispro, Drug	f. Low or Middle Income Country (LMIC) ,d. Other European Union (EU) country ,g. Other developed	a. Clinical	a. Individually randomized trial (Skip Q12)	1. Yes, one primary	2. Yes - PRO is secondary (not primary outcome)	3. NA - trial does not have multiple co-primary outcomes		7. NA - PROs not primary	3. Symptoms/symptom burden,5. Patient experience,6. Other (specify)	6. NA - trial does not have PROs as primary outcome(s)	2. No	2. No	1. Yes, for (co)primary	10. Target difference not justified	N/A or unclear	4. NA		1. Yes	1. Industry	Non-inferiority	Frequentist
13441	2014	JAMA Internal Medicine	20.768	No	No	Treatment	Collaborative care, Other; Usual care, Other	b. USA	a. Clinical	a. Individually randomized trial (Skip Q12)	1. Yes, one primary	1. Yes - PRO is primary or co-primary outcome	3. NA - trial does not have multiple co-primary outcomes	Yes	1. HRQoL or QoL	2. Functional status,3. Symptoms/symptom burden,4. Health behaviours	1. Yes, lit citation or explanation	2. No	2. No	1. Yes, for (co)primary	10. Target difference not justified	N/A or unclear	4. NA		2. No	"2. Government, international agency, university"	Superiority	Frequentist
12656	2014	JAMA Internal Medicine	20.768	No	Yes	Health Services Research	knowledge transfer tool, Behavioral	a. Canada	a. Clinical	b. Cluster randomized trial	1. Yes, one primary	3. No - There are no PROs	3. NA - trial does not have multiple co-primary outcomes		7. NA - PROs not primary	7. NA - PROs not secondary	6. NA - trial does not have PROs as primary outcome(s)	2. No	2. No	1. Yes, for (co)primary	6. Evidence review	realistic	4. NA		2. No	"2. Government, international agency, university"	Superiority	Frequentist
13440	2014	JAMA Pediatrics	12.004	Yes	No	Treatment	Adolescent Trauma Support Program, Behavioral	b. USA	a. Clinical	a. Individually randomized trial (Skip Q12)	4. No or unclear	1. Yes - PRO is primary or co-primary outcome	2. No	Yes	3. Symptoms/symptom burden,4. Health behaviours	4. Health behaviours	4. No	2. No	2. No	2. Yes, but not for (co)primary	7. Pilot study or realistic difference	realistic	4. NA		2. No	"2. Government, international agency, university"	Superiority	Frequentist
13157	2014	PLoS ONE [Electronic Resource]	2.776	No	No	Health Services Research	intermediate care clinics (ICCs), Other	c. UK	a. Clinical	b. Cluster randomized trial	1. Yes, one primary	2. Yes - PRO is secondary (not primary outcome)	3. NA - trial does not have multiple co-primary outcomes		7. NA - PROs not primary	2. Functional status	6. NA - trial does not have PROs as primary outcome(s)	2. No	2. No	1. Yes, for (co)primary	10. Target difference not justified	N/A or unclear	4. NA		2. No	"2. Government, international agency, university"	Superiority	Frequentist
13299	2014	BMC Cancer	2.933	No	No	Screening	Refrigerator Magnet, Behavioral	a. Canada	a. Clinical	b. Cluster randomized trial	1. Yes, one primary	3. No - There are no PROs	3. NA - trial does not have multiple co-primary outcomes		7. NA - PROs not primary	7. NA - PROs not secondary	6. NA - trial does not have PROs as primary outcome(s)	2. No	2. No	1. Yes, for (co)primary	10. Target difference not justified	N/A or unclear	4. NA		3. Unclear or other	"2. Government, international agency, university"	Superiority	Frequentist
13561	2014	PLoS ONE [Electronic Resource]	2.776	No	No	Supportive Care	Training course for practice nurses in autonomy support, Behavioral	d. Other European Union (EU) country	a. Clinical	b. Cluster randomized trial	4. No or unclear	1. Yes - PRO is primary or co-primary outcome	1. Yes	No	2. Functional status	2. Functional status,5. Patient experience	4. No	2. No	2. No	1. Yes, for (co)primary	6. Evidence review	realistic	4. NA		2. No	"3. Foundation, special interest group"	Superiority	Frequentist
13289	2014	Lancet	59.102	No	No	Prevention	isoniazid, Drug; Placebo, Drug	f. Low or Middle Income Country (LMIC)	a. Clinical	a. Individually randomized trial (Skip Q12)	1. Yes, one primary	3. No - There are no PROs	3. NA - trial does not have multiple co-primary outcomes		7. NA - PROs not primary	7. NA - PROs not secondary	6. NA - trial does not have PROs as primary outcome(s)	2. No	2. No	1. Yes, for (co)primary	10. Target difference not justified	N/A or unclear	4. NA		1. Yes	"2. Government, international agency, university","3. Foundation, special interest group"	Superiority	Frequentist
4346	2015	Schizophrenia Bulletin	7.289	No	No	Treatment	Risperidone microspheres, Drug; Risperidone, Drug; Olanzapine, Drug; Quetiapine, Drug; Ziprasidone, Drug; Aripiprazole, Drug; Paliperidone, Drug	g. Other developed	a. Clinical	a. Individually randomized trial (Skip Q12)	1. Yes, one primary	3. No - There are no PROs	3. NA - trial does not have multiple co-primary outcomes		7. NA - PROs not primary	7. NA - PROs not secondary	6. NA - trial does not have PROs as primary outcome(s)	2. No	2. No	3. No	13. No SS calc	N/A or unclear	4. NA		4. NA - no sample size calculation	"2. Government, international agency, university"	Superiority	Bayesian
12752	2014	BMC Public Health	2.567	No	No	Health Services Research	Full Smoking Cessation Treatment Coverage (100%), Other; No Smoking Cessation Treatment Coverage (0%), Other	a. Canada	a. Clinical	a. Individually randomized trial (Skip Q12)	1. Yes, one primary	1. Yes - PRO is primary or co-primary outcome	3. NA - trial does not have multiple co-primary outcomes		4. Health behaviours	4. Health behaviours	1. Yes, lit citation or explanation	2. No	2. No	1. Yes, for (co)primary	6. Evidence review	both	4. NA		2. No	1. Industry	Superiority	Frequentist
13214	2014	Lancet	59.102	Yes	No	Prevention	Control, Behavioral; ECD, Behavioral; Enhanced Nutrition, Behavioral	f. Low or Middle Income Country (LMIC)	b. Public health	b. Cluster randomized trial	2. Yes, two co-primaries	3. No - There are no PROs	2. No		7. NA - PROs not primary	7. NA - PROs not secondary	6. NA - trial does not have PROs as primary outcome(s)	3. Unclear or other (specify)	1. Yes	1. Yes, for (co)primary	6. Evidence review	realistic	4. NA		1. Yes	"3. Foundation, special interest group"	Superiority	Frequentist
12897	2014	Pediatrics	5.401	No	No	Health Services Research	Assessment , Feedback, Incentives, and eXchange Program, Other	b. USA	b. Public health	b. Cluster randomized trial	2. Yes, two co-primaries	3. No - There are no PROs	2. No		7. NA - PROs not primary	7. NA - PROs not secondary	6. NA - trial does not have PROs as primary outcome(s)	2. No	2. No	1. Yes, for (co)primary	9. Calculated the detectable difference given sample size	realistic	4. NA		2. No	1. Industry,"2. Government, international agency, university"	Superiority	Frequentist
12776	2014	Anesthesia & Analgesia	3.489	No	No	Prevention	Hemodynamic monitoring, Device; Usual treatment, Other	d. Other European Union (EU) country ,g. Other developed	a. Clinical	a. Individually randomized trial (Skip Q12)	4. No or unclear	3. No - There are no PROs	2. No		7. NA - PROs not primary	7. NA - PROs not secondary	6. NA - trial does not have PROs as primary outcome(s)	2. No	2. No	2. Yes, but not for (co)primary	11. Authors state difference is important	important	4. NA		2. No	1. Industry	Superiority	Frequentist
4197	2014	BMJ Open	2.376	No	No	Prevention	Thiazide diuretics, Drug; No diuretics, Drug	g. Other developed	a. Clinical	a. Individually randomized trial (Skip Q12)	1. Yes, one primary	3. No - There are no PROs	3. NA - trial does not have multiple co-primary outcomes		7. NA - PROs not primary	7. NA - PROs not secondary	6. NA - trial does not have PROs as primary outcome(s)	2. No	2. No	1. Yes, for (co)primary	7. Pilot study or realistic difference	N/A or unclear	4. NA		1. Yes	"2. Government, international agency, university","3. Foundation, special interest group",1. Industry	Equivalence	Frequentist
11652	2015	Transplantation	4.593	No	No	Prevention	Monitoring - blood samples drawn to test for HHV-6 and HHV-7, Procedure	a. Canada	a. Clinical	a. Individually randomized trial (Skip Q12)	1. Yes, one primary	3. No - There are no PROs	3. NA - trial does not have multiple co-primary outcomes		7. NA - PROs not primary	7. NA - PROs not secondary	6. NA - trial does not have PROs as primary outcome(s)	2. No	2. No	1. Yes, for (co)primary	10. Target difference not justified	N/A or unclear	4. NA		2. No	"3. Foundation, special interest group"	Superiority	Frequentist
12734	2014	Clinical Therapeutics	2.935	No	No	Health Services Research	Pharmacist-Physician Collaborative Medication Therapy Management, Other	b. USA	a. Clinical	a. Individually randomized trial (Skip Q12)	1. Yes, one primary	2. Yes - PRO is secondary (not primary outcome)	3. NA - trial does not have multiple co-primary outcomes		7. NA - PROs not primary	5. Patient experience	6. NA - trial does not have PROs as primary outcome(s)	1. Yes	1. Yes	1. Yes, for (co)primary	10. Target difference not justified	N/A or unclear	4. NA		2. No	"2. Government, international agency, university"	Superiority	Frequentist
12799	2014	Annals of Internal Medicine	19.315	No	No	Treatment	Manual Physical Therapy, Procedure; Corticosteroid Injection, Procedure	b. USA	a. Clinical	a. Individually randomized trial (Skip Q12)	1. Yes, one primary	1. Yes - PRO is primary or co-primary outcome	3. NA - trial does not have multiple co-primary outcomes		3. Symptoms/symptom burden	1. HRQoL or QoL,3. Symptoms/symptom burden	1. Yes, lit citation or explanation	2. No	2. No	1. Yes, for (co)primary	6. Evidence review	important	4. NA		1. Yes	1. Industry,"3. Foundation, special interest group"	Superiority	Frequentist
12654	2014	Jacc: Cardiovascular Interventions	9.544	No	No	Treatment	Transradial PCI, Procedure; Transfemoral PCI, Procedure	b. USA	a. Clinical	a. Individually randomized trial (Skip Q12)	2. Yes, two co-primaries	3. No - There are no PROs	2. No		7. NA - PROs not primary	7. NA - PROs not secondary	6. NA - trial does not have PROs as primary outcome(s)	2. No	2. No	1. Yes, for (co)primary	10. Target difference not justified	N/A or unclear	4. NA		2. No	"2. Government, international agency, university"	Superiority	Frequentist
13408	2014	Intensive Care Medicine	18.967	No	No	Prevention	repositioning, Other	d. Other European Union (EU) country	a. Clinical	a. Individually randomized trial (Skip Q12)	1. Yes, one primary	3. No - There are no PROs	3. NA - trial does not have multiple co-primary outcomes		7. NA - PROs not primary	7. NA - PROs not secondary	6. NA - trial does not have PROs as primary outcome(s)	2. No	2. No	1. Yes, for (co)primary	7. Pilot study or realistic difference	realistic	4. NA		1. Yes	"2. Government, international agency, university"	Superiority	Frequentist
13032	2014	American Journal of Preventive Medicine	4.435	No	No	Prevention	Small change approach to improve physical activity and diet, Behavioral; MOVE! Usual Care, Behavioral	b. USA	a. Clinical	a. Individually randomized trial (Skip Q12)	1. Yes, one primary	2. Yes - PRO is secondary (not primary outcome)	3. NA - trial does not have multiple co-primary outcomes		7. NA - PROs not primary	1. HRQoL or QoL	6. NA - trial does not have PROs as primary outcome(s)	2. No	2. No	1. Yes, for (co)primary	7. Pilot study or realistic difference	realistic	4. NA		1. Yes	"2. Government, international agency, university"	Non-inferiority	Frequentist
11857	2015	International Journal of Nursing Studies	3.57	No	No	Supportive Care	Pressurized irrigation method, Procedure; Swabbing wound cleansing method, Procedure	g. Other developed	a. Clinical	a. Individually randomized trial (Skip Q12)	1. Yes, one primary	2. Yes - PRO is secondary (not primary outcome)	3. NA - trial does not have multiple co-primary outcomes		7. NA - PROs not primary	1. HRQoL or QoL,5. Patient experience,3. Symptoms/symptom burden	6. NA - trial does not have PROs as primary outcome(s)	2. No	2. No	2. Yes, but not for (co)primary	10. Target difference not justified	N/A or unclear	4. NA		1. Yes	"2. Government, international agency, university"	Superiority	Frequentist
13020	2014	Annals of Internal Medicine	19.315	No	No	Treatment	Home exercise, Other; Chiropractic Spinal Manipulative Therapy + Home exercise, Other	b. USA	a. Clinical	a. Individually randomized trial (Skip Q12)	1. Yes, one primary	1. Yes - PRO is primary or co-primary outcome	3. NA - trial does not have multiple co-primary outcomes	Yes	3. Symptoms/symptom burden	2. Functional status,3. Symptoms/symptom burden,4. Health behaviours,5. Patient experience	4. No	2. No	2. No	1. Yes, for (co)primary	6. Evidence review	important	4. NA		1. Yes	"2. Government, international agency, university"	Superiority	Frequentist
12962	2014	New England Journal of Medicine	70.67	No	No	Diagnostic	Point-of-care Ultrasound, Other; Radiology Ultrasound, Radiation; Radiology CT, Other	b. USA	a. Clinical	a. Individually randomized trial (Skip Q12)	2. Yes, two co-primaries	2. Yes - PRO is secondary (not primary outcome)	2. No		7. NA - PROs not primary	3. Symptoms/symptom burden	6. NA - trial does not have PROs as primary outcome(s)	2. No	2. No	1. Yes, for (co)primary	10. Target difference not justified	N/A or unclear	4. NA		2. No	"2. Government, international agency, university"	Superiority	Frequentist
12674	2014	Diabetes Care	15.27	No	No	Treatment	Intervention Phone Call, Behavioral	b. USA	a. Clinical	b. Cluster randomized trial	1. Yes, one primary	3. No - There are no PROs	2. No		7. NA - PROs not primary	7. NA - PROs not secondary	6. NA - trial does not have PROs as primary outcome(s)	2. No	2. No	3. No	13. No SS calc	N/A or unclear	4. NA		2. No	"2. Government, international agency, university"	Superiority	Frequentist
12709	2014	Journal of Translational Medicine	4.098	No	No	Prevention	Shared glycaemic control care within the local three-tier's antenatal care network, Behavioral	f. Low or Middle Income Country (LMIC)	a. Clinical	a. Individually randomized trial (Skip Q12)	1. Yes, one primary	3. No - There are no PROs	3. NA - trial does not have multiple co-primary outcomes		7. NA - PROs not primary	7. NA - PROs not secondary	6. NA - trial does not have PROs as primary outcome(s)	2. No	2. No	1. Yes, for (co)primary	10. Target difference not justified	N/A or unclear	4. NA		2. No	1. Industry	Superiority	Frequentist
11893	2015	Cancer Epidemiology, Biomarkers & Prevention	5.057	No	No	Health Services Research	Health counselling by nurse navigator, Behavioral; Usual primary care counselling, Behavioral	a. Canada	a. Clinical	a. Individually randomized trial (Skip Q12)	1. Yes, one primary	3. No - There are no PROs	3. NA - trial does not have multiple co-primary outcomes		7. NA - PROs not primary	7. NA - PROs not secondary	6. NA - trial does not have PROs as primary outcome(s)	2. No	2. No	1. Yes, for (co)primary	10. Target difference not justified	N/A or unclear	4. NA		2. No	"2. Government, international agency, university"	Superiority	Frequentist
13056	2014	Thorax	9.64	Yes	No	Treatment	3% hypertonic saline, Device	c. UK	a. Clinical	a. Individually randomized trial (Skip Q12)	1. Yes, one primary	2. Yes - PRO is secondary (not primary outcome)	3. NA - trial does not have multiple co-primary outcomes		7. NA - PROs not primary	1. HRQoL or QoL,6. Other (specify),3. Symptoms/symptom burden	6. NA - trial does not have PROs as primary outcome(s)	2. No	2. No	1. Yes, for (co)primary	10. Target difference not justified	N/A or unclear	4. NA		2. No	"2. Government, international agency, university"	Superiority	Frequentist
11965	2014	PLoS ONE [Electronic Resource]	2.776	No	No	Prevention	Methadone, Drug	d. Other European Union (EU) country	a. Clinical	a. Individually randomized trial (Skip Q12)	1. Yes, one primary	1. Yes - PRO is primary or co-primary outcome	3. NA - trial does not have multiple co-primary outcomes	Yes	4. Health behaviours	4. Health behaviours,5. Patient experience,6. Other (specify)	1. Yes, lit citation or explanation	2. No	2. No	1. Yes, for (co)primary	6. Evidence review	realistic	4. NA		2. No	"2. Government, international agency, university"	Non-inferiority	Frequentist
12159	2014	Annals of Internal Medicine	19.315	No	No	Prevention	Stage 1, Behavioral; Stage 2, Behavioral	b. USA	a. Clinical	b. Cluster randomized trial	1. Yes, one primary	3. No - There are no PROs	3. NA - trial does not have multiple co-primary outcomes		7. NA - PROs not primary	7. NA - PROs not secondary	6. NA - trial does not have PROs as primary outcome(s)	2. No	2. No	1. Yes, for (co)primary	6. Evidence review	realistic	4. NA		2. No	"2. Government, international agency, university","3. Foundation, special interest group"	Superiority	Frequentist
11691	2015	JAMA Psychiatry	15.916	No	No	Treatment	Telemedicine Outreach for PTSD, Other	b. USA	a. Clinical	a. Individually randomized trial (Skip Q12)	1. Yes, one primary	1. Yes - PRO is primary or co-primary outcome	3. NA - trial does not have multiple co-primary outcomes		3. Symptoms/symptom burden	1. HRQoL or QoL,3. Symptoms/symptom burden,4. Health behaviours	4. No	2. No	2. No	1. Yes, for (co)primary	9. Calculated the detectable difference given sample size	N/A or unclear	4. NA	0.5	2. No	"2. Government, international agency, university"	Superiority	Frequentist
12579	2015	Diabetes Research & Clinical Practice	3.239	No	No	Treatment	Lifestyle Counseling, Behavioral	d. Other European Union (EU) country	a. Clinical	b. Cluster randomized trial	4. No or unclear	2. Yes - PRO is secondary (not primary outcome)	3. NA - trial does not have multiple co-primary outcomes		7. NA - PROs not primary	4. Health behaviours	6. NA - trial does not have PROs as primary outcome(s)	2. No	1. Yes	1. Yes, for (co)primary	7. Pilot study or realistic difference	realistic	4. NA		1. Yes	"2. Government, international agency, university"	Superiority	Frequentist
12436	2015	Journal of Allergy & Clinical Immunology	14.11	Yes	No	Treatment	Asthma Coaching Program, Behavioral; Usual Care, Behavioral	b. USA	a. Clinical	b. Cluster randomized trial	1. Yes, one primary	1. Yes - PRO is primary or co-primary outcome	3. NA - trial does not have multiple co-primary outcomes		3. Symptoms/symptom burden	7. NA - PROs not secondary	4. No	2. No	2. No	1. Yes, for (co)primary	10. Target difference not justified	N/A or unclear	4. NA	0.3	2. No	"2. Government, international agency, university"	Superiority	Frequentist
11883	2015	Lancet	59.102	No	No	Treatment	Increasing use of Antenatal Corticosteroids (ACS), Behavioral	f. Low or Middle Income Country (LMIC) ,g. Other developed	a. Clinical	b. Cluster randomized trial	1. Yes, one primary	3. No - There are no PROs	3. NA - trial does not have multiple co-primary outcomes		7. NA - PROs not primary	7. NA - PROs not secondary	6. NA - trial does not have PROs as primary outcome(s)	2. No	2. No	1. Yes, for (co)primary	7. Pilot study or realistic difference	realistic	4. NA		2. No	"2. Government, international agency, university"	Superiority	Frequentist
12028	2014	The Lancet Respiratory Medicine	22.992	No	No	Health Services Research	Breathlessness Support Service, Other	c. UK	a. Clinical	a. Individually randomized trial (Skip Q12)	1. Yes, one primary	2. Yes - PRO is secondary (not primary outcome)	3. NA - trial does not have multiple co-primary outcomes		7. NA - PROs not primary	1. HRQoL or QoL,3. Symptoms/symptom burden	6. NA - trial does not have PROs as primary outcome(s)	2. No	1. Yes	1. Yes, for (co)primary	10. Target difference not justified	N/A or unclear	4. NA		1. Yes	"2. Government, international agency, university"	Superiority	Frequentist
12095	2014	PLoS Medicine / Public Library of Science	11.048	No	No	Diagnostic	Xpert MTB/Rif, Other; Smear microscopy, Other	g. Other developed	b. Public health	b. Cluster randomized trial	4. No or unclear	3. No - There are no PROs	2. No		7. NA - PROs not primary	7. NA - PROs not secondary	6. NA - trial does not have PROs as primary outcome(s)	2. No	2. No	1. Yes, for (co)primary	10. Target difference not justified	N/A or unclear	4. NA		2. No	"2. Government, international agency, university","3. Foundation, special interest group"	Superiority	Frequentist
11844	2015	JAMA Internal Medicine	20.768	No	No	Health Services Research	Tobacco Treatment, Behavioral	b. USA	b. Public health	a. Individually randomized trial (Skip Q12)	1. Yes, one primary	1. Yes - PRO is primary or co-primary outcome	3. NA - trial does not have multiple co-primary outcomes		4. Health behaviours	7. NA - PROs not secondary	4. No	2. No	2. No	3. No	13. No SS calc	N/A or unclear	4. NA		4. NA - no sample size calculation	"2. Government, international agency, university"	Superiority	Frequentist
12400	2015	Gut	17.943	No	No	Health Services Research	Colonoscopy, Procedure	g. Other developed	a. Clinical	a. Individually randomized trial (Skip Q12)	1. Yes, one primary	2. Yes - PRO is secondary (not primary outcome)	3. NA - trial does not have multiple co-primary outcomes		7. NA - PROs not primary	3. Symptoms/symptom burden,5. Patient experience	6. NA - trial does not have PROs as primary outcome(s)	2. No	2. No	1. Yes, for (co)primary	7. Pilot study or realistic difference	realistic	4. NA		3. Unclear or other	5. Not specified	Non-inferiority	Frequentist
3876	2015	Clinical Infectious Diseases	9.055	Yes	No	Treatment	Amoxicillin, Drug; Benzyl penicillin, Drug	f. Low or Middle Income Country (LMIC)	b. Public health	a. Individually randomized trial (Skip Q12)	1. Yes, one primary	3. No - There are no PROs	3. NA - trial does not have multiple co-primary outcomes		7. NA - PROs not primary	7. NA - PROs not secondary	6. NA - trial does not have PROs as primary outcome(s)	2. No	2. No	1. Yes, for (co)primary	6. Evidence review	realistic	4. NA		2. No	"2. Government, international agency, university"	Non-inferiority	Frequentist
12033	2015	Ultrasound in Obstetrics & Gynecology	5.595	No	No	Diagnostic	echography, Other	d. Other European Union (EU) country	a. Clinical	a. Individually randomized trial (Skip Q12)	1. Yes, one primary	3. No - There are no PROs	3. NA - trial does not have multiple co-primary outcomes		7. NA - PROs not primary	7. NA - PROs not secondary	6. NA - trial does not have PROs as primary outcome(s)	2. No	2. No	1. Yes, for (co)primary	10. Target difference not justified	N/A or unclear	4. NA		2. No	5. Not specified	Superiority	Frequentist
11821	2015	Intensive Care Medicine	18.967	No	No	Supportive Care	Protocolized care, Procedure	b. USA	a. Clinical	a. Individually randomized trial (Skip Q12)	1. Yes, one primary	3. No - There are no PROs	3. NA - trial does not have multiple co-primary outcomes		7. NA - PROs not primary	7. NA - PROs not secondary	6. NA - trial does not have PROs as primary outcome(s)	2. No	2. No	1. Yes, for (co)primary	10. Target difference not justified	N/A or unclear	4. NA		2. No	"2. Government, international agency, university",1. Industry	Superiority	Frequentist
12464	2015	JAMA	51.273	No	No	Prevention	Chlorhexidine bathing, Other; Non-chlorhexidine bathing, Other	b. USA	a. Clinical	b. Cluster randomized trial	1. Yes, one primary	3. No - There are no PROs	3. NA - trial does not have multiple co-primary outcomes		7. NA - PROs not primary	7. NA - PROs not secondary	6. NA - trial does not have PROs as primary outcome(s)	2. No	2. No	1. Yes, for (co)primary	10. Target difference not justified	realistic	4. NA		2. No	"2. Government, international agency, university"	Superiority	Frequentist
12155	2015	Psychiatric Services	2.253	No	No	Treatment	Cognitive Behavioral Group Therapy, Behavioral; Cognitive remediation, Behavioral; Medications, Drug; MFG, Behavioral; Assertive case management, Behavioral; Treatment as Usual in the community, Other	b. USA	a. Clinical	a. Individually randomized trial (Skip Q12)	1. Yes, one primary	1. Yes - PRO is primary or co-primary outcome	3. NA - trial does not have multiple co-primary outcomes		6. Other (specify)	7. NA - PROs not secondary	4. No	2. No	2. No	3. No	13. No SS calc	N/A or unclear	4. NA		4. NA - no sample size calculation	"2. Government, international agency, university","3. Foundation, special interest group"	Superiority	Frequentist
11675	2015	JAMA	51.273	No	No	Treatment	1:1:1 Blood Transfusion Ratio, Biological; 1:1:2 Blood Transfusion Ratio, Biological	a. Canada ,b. USA	a. Clinical	a. Individually randomized trial (Skip Q12)	1. Yes, one primary	3. No - There are no PROs	2. No		7. NA - PROs not primary	7. NA - PROs not secondary	6. NA - trial does not have PROs as primary outcome(s)	2. No	2. No	1. Yes, for (co)primary	7. Pilot study or realistic difference	realistic	4. NA		2. No	"2. Government, international agency, university"	Superiority	Frequentist
12045	2015	Critical Care Medicine	6.971	No	No	Treatment	Knowledge Translation, Behavioral	a. Canada	a. Clinical	b. Cluster randomized trial	1. Yes, one primary	3. No - There are no PROs	3. NA - trial does not have multiple co-primary outcomes		7. NA - PROs not primary	7. NA - PROs not secondary	6. NA - trial does not have PROs as primary outcome(s)	2. No	2. No	1. Yes, for (co)primary	9. Calculated the detectable difference given sample size	N/A or unclear	4. NA		2. No	"2. Government, international agency, university","3. Foundation, special interest group"	Superiority	Frequentist
11981	2015	The Lancet Respiratory Medicine	22.992	No	No	Diagnostic	Endobronchial or Endoscopic Ultrasound, Procedure; Bronchoscopy, CT-guided biopsy, PET scan, Mediastinoscopy, Procedure	c. UK	a. Clinical	a. Individually randomized trial (Skip Q12)	1. Yes, one primary	3. No - There are no PROs	3. NA - trial does not have multiple co-primary outcomes		7. NA - PROs not primary	7. NA - PROs not secondary	6. NA - trial does not have PROs as primary outcome(s)	2. No	3. Unclear or other (specify)	1. Yes, for (co)primary	7. Pilot study or realistic difference	realistic	4. NA		2. No	"2. Government, international agency, university"	Superiority	Frequentist
11872	2015	JAMA Pediatrics	12.004	Yes	No	Treatment	Speech recognition, Behavioral; Speech recognition, Behavioral	b. USA	a. Clinical	a. Individually randomized trial (Skip Q12)	1. Yes, one primary	2. Yes - PRO is secondary (not primary outcome)	3. NA - trial does not have multiple co-primary outcomes		7. NA - PROs not primary	5. Patient experience	6. NA - trial does not have PROs as primary outcome(s)	1. Yes	2. No	3. No	13. No SS calc	N/A or unclear	4. NA		4. NA - no sample size calculation	"2. Government, international agency, university"	Superiority	Frequentist
12280	2015	Obesity	3.969	No	No	Treatment	INCENT weight loss program, Behavioral; Livin My Weigh, Behavioral	b. USA	b. Public health	b. Cluster randomized trial	1. Yes, one primary	2. Yes - PRO is secondary (not primary outcome)	3. NA - trial does not have multiple co-primary outcomes		7. NA - PROs not primary	4. Health behaviours	6. NA - trial does not have PROs as primary outcome(s)	2. No	2. No	3. No	13. No SS calc	N/A or unclear	4. NA		4. NA - no sample size calculation	"2. Government, international agency, university"	Superiority	Frequentist
12427	2015	JAMA Pediatrics	12.004	Yes	No	Health Services Research	Collaborative Pop-Based R/R: Phone/Mail Group, Behavioral; Collaborative Pop-Based R/R: Mail-Only Group, Behavioral; Practice-based Recall, Behavioral	b. USA	b. Public health	b. Cluster randomized trial	1. Yes, one primary	3. No - There are no PROs	3. NA - trial does not have multiple co-primary outcomes		7. NA - PROs not primary	7. NA - PROs not secondary	6. NA - trial does not have PROs as primary outcome(s)	1. Yes	1. Yes	1. Yes, for (co)primary	10. Target difference not justified	N/A or unclear	4. NA		2. No	"2. Government, international agency, university"	Superiority	Frequentist
11005	2015	Preventive Medicine	3.449	No	No		Healthy Eating + Eco-Friendly Campaign, Behavioral; Healthy Eating Campaign, Behavioral	b. USA	b. Public health	b. Cluster randomized trial	4. No or unclear	3. No - There are no PROs	3. NA - trial does not have multiple co-primary outcomes		7. NA - PROs not primary	7. NA - PROs not secondary	6. NA - trial does not have PROs as primary outcome(s)	1. Yes	2. No	1. Yes, for (co)primary	7. Pilot study or realistic difference	realistic	4. NA		1. Yes	"2. Government, international agency, university","3. Foundation, special interest group"	Superiority	Frequentist
10947	2015	PLoS ONE [Electronic Resource]	2.776	No	No	Prevention	Intervention Group, Behavioral; Control Group, Behavioral	a. Canada	b. Public health	b. Cluster randomized trial	1. Yes, one primary	3. No - There are no PROs	3. NA - trial does not have multiple co-primary outcomes		7. NA - PROs not primary	7. NA - PROs not secondary	6. NA - trial does not have PROs as primary outcome(s)	2. No	2. No	1. Yes, for (co)primary	5. Stakeholder/patient opinion	important	4. NA		2. No	"3. Foundation, special interest group","2. Government, international agency, university"	Superiority	Frequentist
10666	2015	Infection Control & Hospital Epidemiology	2.856	No	No	Prevention	intervention, Other	g. Other developed	a. Clinical	b. Cluster randomized trial	4. No or unclear	3. No - There are no PROs	3. NA - trial does not have multiple co-primary outcomes		7. NA - PROs not primary	7. NA - PROs not secondary	6. NA - trial does not have PROs as primary outcome(s)	2. No	2. No	1. Yes, for (co)primary	6. Evidence review	N/A or unclear	4. NA		2. No	"2. Government, international agency, university","3. Foundation, special interest group"	Superiority	Frequentist
11108	2015	JAMA Internal Medicine	20.768	No	No	Health Services Research	discontinue statins, Other	b. USA	a. Clinical	a. Individually randomized trial (Skip Q12)	1. Yes, one primary	2. Yes - PRO is secondary (not primary outcome)	3. NA - trial does not have multiple co-primary outcomes		7. NA - PROs not primary	1. HRQoL or QoL,2. Functional status,3. Symptoms/symptom burden,4. Health behaviours,5. Patient experience	6. NA - trial does not have PROs as primary outcome(s)	2. No	2. No	1. Yes, for (co)primary	8. No target difference stated	N/A or unclear	4. NA		2. No	"2. Government, international agency, university"	Non-inferiority	Frequentist
10872	2015	American Journal of Psychiatry	13.655	No	No	Prevention	In SHAPE, Behavioral; Fitness Club Membership, Behavioral	b. USA	a. Clinical	a. Individually randomized trial (Skip Q12)	2. Yes, two co-primaries	2. Yes - PRO is secondary (not primary outcome)	2. No		7. NA - PROs not primary	4. Health behaviours	6. NA - trial does not have PROs as primary outcome(s)	2. No	2. No	2. Yes, but not for (co)primary	7. Pilot study or realistic difference	realistic	4. NA		1. Yes	"2. Government, international agency, university"	Superiority	Frequentist
11604	2015	New England Journal of Medicine	70.67	No	No	Treatment	Preferred empirical treatment, Other	d. Other European Union (EU) country	a. Clinical	b. Cluster randomized trial	1. Yes, one primary	3. No - There are no PROs	3. NA - trial does not have multiple co-primary outcomes		7. NA - PROs not primary	7. NA - PROs not secondary	6. NA - trial does not have PROs as primary outcome(s)	2. No	2. No	3. No	13. No SS calc	N/A or unclear	4. NA		1. Yes	"2. Government, international agency, university"	Non-inferiority	Frequentist
11401	2015	Lancet	59.102	No	No	Treatment	Induction of labor vs waiting, Procedure	d. Other European Union (EU) country ,g. Other developed	a. Clinical	a. Individually randomized trial (Skip Q12)	1. Yes, one primary	3. No - There are no PROs	3. NA - trial does not have multiple co-primary outcomes		7. NA - PROs not primary	7. NA - PROs not secondary	6. NA - trial does not have PROs as primary outcome(s)	2. No	2. No	1. Yes, for (co)primary	10. Target difference not justified	N/A or unclear	4. NA		2. No	"2. Government, international agency, university"	Superiority	Frequentist
11619	2015	Acupuncture in Medicine	2.637	Yes	No	Treatment	Acupuncture, Device	g. Other developed	a. Clinical	a. Individually randomized trial (Skip Q12)	1. Yes, one primary	1. Yes - PRO is primary or co-primary outcome	3. NA - trial does not have multiple co-primary outcomes		3. Symptoms/symptom burden	3. Symptoms/symptom burden	4. No	2. No	2. No	1. Yes, for (co)primary	10. Target difference not justified	N/A or unclear	4. NA		1. Yes	5. Not specified	Superiority	Frequentist
10894	2015	BMC Nephrology	2.088	No	No	Health Services Research	Pharmacist based QI program, Other; Usual Care, Other	b. USA	a. Clinical	a. Individually randomized trial (Skip Q12)	2. Yes, two co-primaries	2. Yes - PRO is secondary (not primary outcome)	2. No		7. NA - PROs not primary	1. HRQoL or QoL,3. Symptoms/symptom burden,5. Patient experience,4. Health behaviours	6. NA - trial does not have PROs as primary outcome(s)	2. No	2. No	1. Yes, for (co)primary	10. Target difference not justified	N/A or unclear	4. NA		2. No	"3. Foundation, special interest group","2. Government, international agency, university"	Superiority	Frequentist
11375	2015	Implementation Science	4.525	No	No	Health Services Research	Knowledge translation intervention, Other; Palm-Plus, Other	f. Low or Middle Income Country (LMIC)	a. Clinical	b. Cluster randomized trial	1. Yes, one primary	3. No - There are no PROs	3. NA - trial does not have multiple co-primary outcomes		7. NA - PROs not primary	7. NA - PROs not secondary	6. NA - trial does not have PROs as primary outcome(s)	2. No	1. Yes	1. Yes, for (co)primary	7. Pilot study or realistic difference	realistic	4. NA		2. No	"3. Foundation, special interest group"	Superiority	Frequentist
10668	2015	CMAJ Canadian Medical Association Journal	6.938	Yes	No	Supportive Care	Veinviewer, Device; Ultrasound, Device; Conventional technique, Other	a. Canada	a. Clinical	a. Individually randomized trial (Skip Q12)	1. Yes, one primary	3. No - There are no PROs	3. NA - trial does not have multiple co-primary outcomes		7. NA - PROs not primary	7. NA - PROs not secondary	6. NA - trial does not have PROs as primary outcome(s)	2. No	2. No	1. Yes, for (co)primary	11. Authors state difference is important	important	4. NA		1. Yes	"3. Foundation, special interest group"	Superiority	Frequentist
10780	2015	Journal of Clinical Psychiatry	4.023	No	No	Prevention	paliperidone, Drug; risperidone, Drug; haloperidole, Drug; perphenazine, Drug; aripiprazole, Drug; quetiapine, Drug; paliperidone palmitate, Drug; olanzapine, Drug	b. USA	a. Clinical	a. Individually randomized trial (Skip Q12)	1. Yes, one primary	2. Yes - PRO is secondary (not primary outcome)	3. NA - trial does not have multiple co-primary outcomes		7. NA - PROs not primary	2. Functional status,3. Symptoms/symptom burden	6. NA - trial does not have PROs as primary outcome(s)	2. No	2. No	1. Yes, for (co)primary	10. Target difference not justified	N/A or unclear	4. NA		1. Yes	1. Industry	Superiority	Frequentist
10794	2015	General Hospital Psychiatry	3.22	No	No	Treatment	Supported self-care, Behavioral; Unsupported self-care, Behavioral	a. Canada	a. Clinical	a. Individually randomized trial (Skip Q12)	1. Yes, one primary		3. NA - trial does not have multiple co-primary outcomes		3. Symptoms/symptom burden	5. Patient experience,6. Other (specify)	4. No			1. Yes, for (co)primary	10. Target difference not justified	N/A or unclear	4. NA		1. Yes	"2. Government, international agency, university"	Superiority	Frequentist
11287	2015	Circulation: Cardiovascular Interventions	6.06	No	No		ADP receptor inhibitors, Drug	b. USA	a. Clinical	b. Cluster randomized trial	1. Yes, one primary	3. No - There are no PROs	3. NA - trial does not have multiple co-primary outcomes		7. NA - PROs not primary	7. NA - PROs not secondary	6. NA - trial does not have PROs as primary outcome(s)	2. No	2. No	1. Yes, for (co)primary	10. Target difference not justified	N/A or unclear	4. NA		1. Yes	1. Industry	Superiority	Frequentist
11400	2015	Complementary Therapies in Medicine	1.979	No	No	Treatment	additive homeopathic treatment, Other	d. Other European Union (EU) country	a. Clinical	a. Individually randomized trial (Skip Q12)	2. Yes, two co-primaries	1. Yes - PRO is primary or co-primary outcome	2. No	Yes	2. Functional status,3. Symptoms/symptom burden	2. Functional status,3. Symptoms/symptom burden	4. No	2. No	2. No	1. Yes, for (co)primary	4. Standardized effect size	N/A or unclear	4. NA		1. Yes	6. No funding	Superiority	Frequentist
11323	2015	Scandinavian Journal of Primary Health Care	2.095	No	Yes	Prevention	Receive municipality-based follow-up visit, Behavioral	d. Other European Union (EU) country	a. Clinical	a. Individually randomized trial (Skip Q12)	1. Yes, one primary	3. No - There are no PROs	3. NA - trial does not have multiple co-primary outcomes		7. NA - PROs not primary	7. NA - PROs not secondary	6. NA - trial does not have PROs as primary outcome(s)	2. No	2. No	1. Yes, for (co)primary	7. Pilot study or realistic difference	realistic	4. NA		2. No	"2. Government, international agency, university"	Superiority	Frequentist
10792	2015	Chest	9.657	No	No	Diagnostic	Rapid on-site evaluation, Other; EBUS-TBNA, Device	d. Other European Union (EU) country	a. Clinical	a. Individually randomized trial (Skip Q12)	4. No or unclear	3. No - There are no PROs	3. NA - trial does not have multiple co-primary outcomes		7. NA - PROs not primary	7. NA - PROs not secondary	6. NA - trial does not have PROs as primary outcome(s)	2. No	2. No	1. Yes, for (co)primary	10. Target difference not justified	N/A or unclear	4. NA		1. Yes	6. No funding	Superiority	Frequentist
11148	2015	BMJ	27.604	No	Yes	Prevention	Fall prevention exercise program, Other	d. Other European Union (EU) country	b. Public health	a. Individually randomized trial (Skip Q12)	1. Yes, one primary	2. Yes - PRO is secondary (not primary outcome)	3. NA - trial does not have multiple co-primary outcomes		7. NA - PROs not primary	1. HRQoL or QoL,2. Functional status,4. Health behaviours	6. NA - trial does not have PROs as primary outcome(s)	2. No	2. No	1. Yes, for (co)primary	10. Target difference not justified	N/A or unclear	4. NA		1. Yes	"2. Government, international agency, university"	Superiority	Frequentist
11380	2015	Journal of Medical Internet Research	4.945	No	No	Prevention	Tool, Device; Self-management Support Program, Behavioral	d. Other European Union (EU) country	a. Clinical	b. Cluster randomized trial	1. Yes, one primary	2. Yes - PRO is secondary (not primary outcome)	3. NA - trial does not have multiple co-primary outcomes		7. NA - PROs not primary	1. HRQoL or QoL,6. Other (specify)	6. NA - trial does not have PROs as primary outcome(s)	1. Yes	2. No	1. Yes, for (co)primary	10. Target difference not justified	N/A or unclear	4. NA		1. Yes	"3. Foundation, special interest group",1. Industry	Superiority	Frequentist
10706	2015	American Journal of Preventive Medicine	4.435	No	No	Supportive Care	telephonic, Behavioral	b. USA	b. Public health	a. Individually randomized trial (Skip Q12)	1. Yes, one primary	2. Yes - PRO is secondary (not primary outcome)	3. NA - trial does not have multiple co-primary outcomes		7. NA - PROs not primary	4. Health behaviours,3. Symptoms/symptom burden,2. Functional status	6. NA - trial does not have PROs as primary outcome(s)	2. No	2. No	1. Yes, for (co)primary	10. Target difference not justified	N/A or unclear	4. NA		2. No	"2. Government, international agency, university"	Superiority	Frequentist
10639	2015	Occupational & Environmental Medicine	3.556	No	No	Treatment	Workcoping and IPS, Behavioral; Ordinary care by GP or NAV, Behavioral	d. Other European Union (EU) country	a. Clinical	a. Individually randomized trial (Skip Q12)	1. Yes, one primary	2. Yes - PRO is secondary (not primary outcome)	3. NA - trial does not have multiple co-primary outcomes		7. NA - PROs not primary	1. HRQoL or QoL,3. Symptoms/symptom burden	6. NA - trial does not have PROs as primary outcome(s)	2. No	2. No	1. Yes, for (co)primary	10. Target difference not justified	N/A or unclear	4. NA		2. No	"2. Government, international agency, university"	Superiority	Frequentist
10395	2016	Acta Psychiatrica Scandinavica	4.694	No	No	Treatment	Aripiprazole, Drug; Olanzapine, Drug; Haloperidol, Drug	d. Other European Union (EU) country	a. Clinical	a. Individually randomized trial (Skip Q12)	1. Yes, one primary	3. No - There are no PROs	3. NA - trial does not have multiple co-primary outcomes		7. NA - PROs not primary	7. NA - PROs not secondary	6. NA - trial does not have PROs as primary outcome(s)	2. No	2. No	1. Yes, for (co)primary	6. Evidence review	realistic	4. NA		1. Yes	1. Industry,"3. Foundation, special interest group"	Superiority	Frequentist
11414	2015	American Journal of Medicine	4.76	No	No	Prevention	Complex tailored intervention, Behavioral; Usual care, Behavioral	d. Other European Union (EU) country	a. Clinical	a. Individually randomized trial (Skip Q12)	1. Yes, one primary	3. No - There are no PROs	3. NA - trial does not have multiple co-primary outcomes		7. NA - PROs not primary	7. NA - PROs not secondary	6. NA - trial does not have PROs as primary outcome(s)	2. No	2. No	1. Yes, for (co)primary	10. Target difference not justified	N/A or unclear	4. NA		1. Yes	"3. Foundation, special interest group"	Superiority	Frequentist
11446	2015	Journal of Clinical Oncology	28.245	No	No	Supportive Care	SCP care, Other	d. Other European Union (EU) country	a. Clinical	b. Cluster randomized trial	2. Yes, two co-primaries	1. Yes - PRO is primary or co-primary outcome	2. No	Yes	5. Patient experience	3. Symptoms/symptom burden,6. Other (specify)	4. No	1. Yes	2. No	1. Yes, for (co)primary	10. Target difference not justified	N/A or unclear	4. NA		1. Yes	"3. Foundation, special interest group"	Superiority	Frequentist
9963	2015	The Lancet. HIV	14.753	No	No	Supportive Care	Palliative care, Other; Standard care, Other	f. Low or Middle Income Country (LMIC)	a. Clinical	a. Individually randomized trial (Skip Q12)	1. Yes, one primary	1. Yes - PRO is primary or co-primary outcome	3. NA - trial does not have multiple co-primary outcomes		3. Symptoms/symptom burden	1. HRQoL or QoL,4. Health behaviours,3. Symptoms/symptom burden	4. No	2. No	2. No	1. Yes, for (co)primary	10. Target difference not justified	N/A or unclear	4. NA		1. Yes	"3. Foundation, special interest group"	Superiority	Frequentist
9813	2016	American Journal of Respiratory & Critical Care Medicine	16.494	No	No	Treatment	Video Laryngoscopy, Device; Apneic Oxygenation, Device; Direct Laryngoscopy, Device; No Apneic Oxygenation, Device	b. USA	a. Clinical	a. Individually randomized trial (Skip Q12)	1. Yes, one primary	3. No - There are no PROs	3. NA - trial does not have multiple co-primary outcomes		7. NA - PROs not primary	7. NA - PROs not secondary	6. NA - trial does not have PROs as primary outcome(s)	2. No	2. No	1. Yes, for (co)primary	6. Evidence review	important	4. NA		2. No	"2. Government, international agency, university"	Superiority	Frequentist
10425	2015	JAMA	51.273	No	No	Treatment	Surgery for acute perforated diverticulitis, Procedure	d. Other European Union (EU) country	a. Clinical	a. Individually randomized trial (Skip Q12)	1. Yes, one primary	2. Yes - PRO is secondary (not primary outcome)	3. NA - trial does not have multiple co-primary outcomes		7. NA - PROs not primary	1. HRQoL or QoL	6. NA - trial does not have PROs as primary outcome(s)	2. No	2. No	1. Yes, for (co)primary	6. Evidence review	realistic	4. NA		1. Yes	"2. Government, international agency, university"	Superiority	Frequentist
10046	2015	Journal of Medical Internet Research	4.945	No	No	Treatment	Lifestyle counseling with smartphone, Behavioral; Lifestyle counseling, Behavioral	a. Canada	a. Clinical	a. Individually randomized trial (Skip Q12)	1. Yes, one primary	2. Yes - PRO is secondary (not primary outcome)	3. NA - trial does not have multiple co-primary outcomes		7. NA - PROs not primary	1. HRQoL or QoL,2. Functional status,3. Symptoms/symptom burden	6. NA - trial does not have PROs as primary outcome(s)	1. Yes	2. No	1. Yes, for (co)primary	10. Target difference not justified	N/A or unclear	4. NA		1. Yes	"2. Government, international agency, university"	Non-inferiority	Frequentist
9699	2015	Journal of Traumatic Stress	1.804	No	No	Treatment	Stepped Care Management, Behavioral	b. USA	a. Clinical	a. Individually randomized trial (Skip Q12)	1. Yes, one primary	1. Yes - PRO is primary or co-primary outcome	3. NA - trial does not have multiple co-primary outcomes		3. Symptoms/symptom burden	3. Symptoms/symptom burden,5. Patient experience,4. Health behaviours,6. Other (specify)	4. No	2. No	2. No	3. No	13. No SS calc	N/A or unclear	4. NA		4. NA - no sample size calculation	"2. Government, international agency, university"	Superiority	Frequentist
9882	2015	Pediatrics	5.401	Yes	No	Health Services Research	HPV brochure, recall, reminders, Behavioral; General Adolescent Vaccine Brochure, Behavioral	b. USA	a. Clinical	a. Individually randomized trial (Skip Q12)	2. Yes, two co-primaries	3. No - There are no PROs	2. No		7. NA - PROs not primary	7. NA - PROs not secondary	6. NA - trial does not have PROs as primary outcome(s)	1. Yes	1. Yes	1. Yes, for (co)primary	6. Evidence review	realistic	4. NA		2. No	"2. Government, international agency, university"	Superiority	Frequentist
10508	2015	JAMA Pediatrics	12.004	Yes	No	Health Services Research	Telephone Interpretation, Other; Video Interpretation, Other	b. USA	a. Clinical	b. Cluster randomized trial	4. No or unclear	1. Yes - PRO is primary or co-primary outcome	1. Yes		5. Patient experience	7. NA - PROs not secondary	4. No	2. No	2. No	1. Yes, for (co)primary	7. Pilot study or realistic difference	N/A or unclear	4. NA		2. No	"2. Government, international agency, university"	Superiority	Frequentist
10605	2015	JAMA	51.273	No	No	Treatment	Tiotropium, Drug; Salmeterol, Drug; Formoterol, Drug	b. USA	a. Clinical	a. Individually randomized trial (Skip Q12)	1. Yes, one primary	2. Yes - PRO is secondary (not primary outcome)	3. NA - trial does not have multiple co-primary outcomes		7. NA - PROs not primary	1. HRQoL or QoL,3. Symptoms/symptom burden,4. Health behaviours	6. NA - trial does not have PROs as primary outcome(s)	2. No	2. No	1. Yes, for (co)primary	10. Target difference not justified	N/A or unclear	4. NA		2. No	"2. Government, international agency, university"	Superiority	Frequentist
9800	2015	Implementation Science	4.525	No	No	Health Services Research	Outreach Facilitation implementing elements of the Chronic Care Model, Other	a. Canada	a. Clinical	b. Cluster randomized trial	1. Yes, one primary	3. No - There are no PROs	3. NA - trial does not have multiple co-primary outcomes		7. NA - PROs not primary	7. NA - PROs not secondary	6. NA - trial does not have PROs as primary outcome(s)	2. No	2. No	1. Yes, for (co)primary	5. Stakeholder/patient opinion,7. Pilot study or realistic difference	both	4. NA		1. Yes	1. Industry,"2. Government, international agency, university"	Superiority	Frequentist
9996	2015	JAMA Pediatrics	12.004	No	No	Screening	Primary Care Physician, Behavioral; Behavioral Medicine Specialist, Behavioral	b. USA	a. Clinical	b. Cluster randomized trial	1. Yes, one primary	3. No - There are no PROs	3. NA - trial does not have multiple co-primary outcomes		7. NA - PROs not primary	7. NA - PROs not secondary	6. NA - trial does not have PROs as primary outcome(s)	2. No	1. Yes	1. Yes, for (co)primary	9. Calculated the detectable difference given sample size	realistic	4. NA		2. No	"2. Government, international agency, university"	Superiority	Frequentist
10100	2015	Implementation Science	4.525	No	No	Health Services Research	Decide2Quit, Behavioral; Smoking Coach, Behavioral	b. USA	b. Public health	b. Cluster randomized trial	4. No or unclear	1. Yes - PRO is primary or co-primary outcome	3. NA - trial does not have multiple co-primary outcomes	Yes	4. Health behaviours	7. NA - PROs not secondary	4. No	2. No	2. No	3. No	13. No SS calc	N/A or unclear	4. NA		4. NA - no sample size calculation	"2. Government, international agency, university"	Superiority	Frequentist
10527	2016	British Journal of Psychiatry	7.233	No	No	Treatment	Sertraline, Drug; trauma-focused cognitive behavioural therapy, Behavioral	d. Other European Union (EU) country	a. Clinical	a. Individually randomized trial (Skip Q12)	1. Yes, one primary	1. Yes - PRO is primary or co-primary outcome	3. NA - trial does not have multiple co-primary outcomes		3. Symptoms/symptom burden	2. Functional status,3. Symptoms/symptom burden	4. No	2. No	2. No	1. Yes, for (co)primary	4. Standardized effect size	realistic	4. NA		1. Yes	"2. Government, international agency, university","3. Foundation, special interest group"	Superiority	Frequentist
10310	2015	American Heart Journal	4.023	No	No	Health Services Research	Educational Reminder, Behavioral	a. Canada	a. Clinical	b. Cluster randomized trial	1. Yes, one primary	1. Yes - PRO is primary or co-primary outcome	3. NA - trial does not have multiple co-primary outcomes		4. Health behaviours	4. Health behaviours	4. No	2. No	2. No	1. Yes, for (co)primary	10. Target difference not justified	N/A or unclear	4. NA		1. Yes	"2. Government, international agency, university","3. Foundation, special interest group"	Superiority	Frequentist
9957	2015	BMC Infectious Diseases	2.565	No	No	Treatment	Daptomycin, Drug; Vancomycin, Drug	b. USA	a. Clinical	a. Individually randomized trial (Skip Q12)	1. Yes, one primary	2. Yes - PRO is secondary (not primary outcome)	3. NA - trial does not have multiple co-primary outcomes		7. NA - PROs not primary	3. Symptoms/symptom burden,1. HRQoL or QoL	6. NA - trial does not have PROs as primary outcome(s)	2. No	2. No	1. Yes, for (co)primary	6. Evidence review	realistic	4. NA		1. Yes	1. Industry	Superiority	Frequentist
10456	2015	Circulation. Cardiovascular Quality & Outcomes	4.378	No	No	Prevention	Population Health Management Intervention, Behavioral	b. USA	a. Clinical	a. Individually randomized trial (Skip Q12)	2. Yes, two co-primaries	3. No - There are no PROs	2. No		7. NA - PROs not primary	7. NA - PROs not secondary	6. NA - trial does not have PROs as primary outcome(s)	2. No	2. No	1. Yes, for (co)primary	10. Target difference not justified	N/A or unclear	4. NA		2. No	"2. Government, international agency, university"	Superiority	Frequentist
9811	2016	Annals of Oncology	14.196	No	No	Diagnostic	surveillance program after completion of primary treatment, Other	d. Other European Union (EU) country	a. Clinical	a. Individually randomized trial (Skip Q12)	2. Yes, two co-primaries	1. Yes - PRO is primary or co-primary outcome	1. Yes		1. HRQoL or QoL	7. NA - PROs not secondary	4. No	2. No	1. Yes	1. Yes, for (co)primary	10. Target difference not justified	N/A or unclear	2. Clinical outcome		2. No	"2. Government, international agency, university"	Superiority	Frequentist
10280	2016	Addiction	6.851	No	No	Treatment	Short Term Combination Nicotine Replacement Therapy (patch + gum), Drug; Long Term Combination Nicotine Replacement Therapy (patch + gum), Drug; Intensive Maintenance Counseling, Behavioral; Cognitive Medication Adherence Counseling (CAM), Behavioral; Electronic Medication Monitoring Device (the Helping Hand) + Feedback, Behavioral; Automated Adherence Prompting Phone Calls, Behavioral	b. USA	b. Public health	a. Individually randomized trial (Skip Q12)	1. Yes, one primary	1. Yes - PRO is primary or co-primary outcome	3. NA - trial does not have multiple co-primary outcomes	Yes	4. Health behaviours	4. Health behaviours	4. No	2. No	2. No	2. Yes, but not for (co)primary	10. Target difference not justified	N/A or unclear	4. NA		2. No	"2. Government, international agency, university","3. Foundation, special interest group"	Superiority	Frequentist
10278	2016	Addiction	6.851	No	No	Treatment	Nicotine Patch, Drug; Nicotine Gum, Drug; Motivational Interviewing, Behavioral; Smoking Reduction, Behavioral; No Intervention, Other; Nicotine Patch + Nicotine Gum, Drug	b. USA	a. Clinical	a. Individually randomized trial (Skip Q12)	1. Yes, one primary	1. Yes - PRO is primary or co-primary outcome	3. NA - trial does not have multiple co-primary outcomes		4. Health behaviours	4. Health behaviours	4. No	2. No	2. No	3. No	13. No SS calc	N/A or unclear	4. NA		4. NA - no sample size calculation	"2. Government, international agency, university"	Superiority	Frequentist
9704	2016	BMJ Quality & Safety	7.043	No	No	Supportive Care	New Medicine Service, Other	b. USA	a. Clinical	a. Individually randomized trial (Skip Q12)	1. Yes, one primary	1. Yes - PRO is primary or co-primary outcome	3. NA - trial does not have multiple co-primary outcomes	Yes	4. Health behaviours	2. Functional status,6. Other (specify)	4. No	3. Unclear or other (specify)	3. Unclear or other (specify)	1. Yes, for (co)primary	7. Pilot study or realistic difference	realistic	4. NA		1. Yes	"2. Government, international agency, university"	Superiority	Frequentist
10281	2016	Diabetes Care	15.27	No	No	Health Services Research	Lifestyle Counseling, Behavioral	b. USA	a. Clinical	b. Cluster randomized trial	2. Yes, two co-primaries	2. Yes - PRO is secondary (not primary outcome)	2. No		7. NA - PROs not primary	3. Symptoms/symptom burden,4. Health behaviours	6. NA - trial does not have PROs as primary outcome(s)	2. No	2. No	1. Yes, for (co)primary	9. Calculated the detectable difference given sample size	N/A or unclear	4. NA		2. No	"2. Government, international agency, university"	Superiority	Frequentist
10334	2016	Mayo Clinic Proceedings	7.091	No	No	Health Services Research	Cardiac Rehabilitation, Behavioral	a. Canada	a. Clinical	a. Individually randomized trial (Skip Q12)	1. Yes, one primary	3. No - There are no PROs	3. NA - trial does not have multiple co-primary outcomes		7. NA - PROs not primary	7. NA - PROs not secondary	6. NA - trial does not have PROs as primary outcome(s)	2. No	2. No	1. Yes, for (co)primary	7. Pilot study or realistic difference	realistic	4. NA		2. No	"3. Foundation, special interest group"	Superiority	Frequentist
10020	2015	BMJ	27.604	No	No	Treatment	Ibuprofen, Drug; Fosfomycin-Trometamol, Drug	d. Other European Union (EU) country	a. Clinical	a. Individually randomized trial (Skip Q12)	2. Yes, two co-primaries	1. Yes - PRO is primary or co-primary outcome	1. Yes		3. Symptoms/symptom burden	3. Symptoms/symptom burden,2. Functional status	4. No	2. No	2. No	1. Yes, for (co)primary	4. Standardized effect size	N/A or unclear	1. PRO		1. Yes	"2. Government, international agency, university"	Non-inferiority	Frequentist
4250	2016	Journal of Interferon & Cytokine Research	1.774	Missing data	Missing data			d. Other European Union (EU) country	a. Clinical	a. Individually randomized trial (Skip Q12)	1. Yes, one primary	2. Yes - PRO is secondary (not primary outcome)	3. NA - trial does not have multiple co-primary outcomes		7. NA - PROs not primary	1. HRQoL or QoL,3. Symptoms/symptom burden	6. NA - trial does not have PROs as primary outcome(s)	2. No	2. No	1. Yes, for (co)primary	10. Target difference not justified	N/A or unclear	4. NA		1. Yes	1. Industry,"2. Government, international agency, university"	Superiority	Frequentist
10218	2016	Plastic & Reconstructive Surgery	3.946	No	No	Diagnostic	laser Doppler imager (Moor), Device	d. Other European Union (EU) country	a. Clinical	a. Individually randomized trial (Skip Q12)	1. Yes, one primary	2. Yes - PRO is secondary (not primary outcome)	3. NA - trial does not have multiple co-primary outcomes		7. NA - PROs not primary	1. HRQoL or QoL	6. NA - trial does not have PROs as primary outcome(s)	2. No	2. No	1. Yes, for (co)primary	7. Pilot study or realistic difference	realistic	4. NA		1. Yes	"3. Foundation, special interest group"	Superiority	Frequentist
9899	2016	JAMA Internal Medicine	20.768	No	No	Treatment	Antibiotic prescription strategies, Other	d. Other European Union (EU) country	a. Clinical	a. Individually randomized trial (Skip Q12)	2. Yes, two co-primaries	1. Yes - PRO is primary or co-primary outcome	2. No		3. Symptoms/symptom burden	2. Functional status,6. Other (specify),4. Health behaviours	4. No	2. No	2. No	1. Yes, for (co)primary	10. Target difference not justified	important	4. NA	2 day reduction in symptom duration	2. No	"2. Government, international agency, university","3. Foundation, special interest group"	Superiority	Frequentist
10542	2016	BMC Health Services Research	1.932	No	No		Use of a PDA to assist shared decision making, Behavioral	b. USA	a. Clinical	a. Individually randomized trial (Skip Q12)	1. Yes, one primary	1. Yes - PRO is primary or co-primary outcome	3. NA - trial does not have multiple co-primary outcomes	Yes	6. Other (specify)	6. Other (specify)	4. No	1. Yes	2. No	1. Yes, for (co)primary	6. Evidence review	realistic	4. NA		2. No	1. Industry	Superiority	Frequentist
10317	2016	Contemporary Clinical Trials	2.28	No	No	Treatment	Cognitive behavioral treatment/farmacotherapy intervention, Other; Treatment As Usual, Other	d. Other European Union (EU) country	a. Clinical	a. Individually randomized trial (Skip Q12)	2. Yes, two co-primaries	1. Yes - PRO is primary or co-primary outcome	2. No		3. Symptoms/symptom burden	2. Functional status,1. HRQoL or QoL,5. Patient experience	4. No	2. No	2. No	1. Yes, for (co)primary	11. Authors state difference is important	important	4. NA		2. No	"2. Government, international agency, university"	Equivalence	Frequentist
10388	2016	Circulation	23.054	No	No	Supportive Care	Informational SMS-text, Behavioral; Interactive SMS-text, Behavioral; Enhanced usual care, Behavioral	f. Low or Middle Income Country (LMIC)	a. Clinical	a. Individually randomized trial (Skip Q12)	1. Yes, one primary	2. Yes - PRO is secondary (not primary outcome)	3. NA - trial does not have multiple co-primary outcomes		7. NA - PROs not primary	5. Patient experience,1. HRQoL or QoL	6. NA - trial does not have PROs as primary outcome(s)	2. No	2. No	1. Yes, for (co)primary	6. Evidence review	important	4. NA		1. Yes	"2. Government, international agency, university","3. Foundation, special interest group"	Superiority	Frequentist
7382	2017	Maternal & Child Nutrition	3.305	Yes	No	Health Services Research	Improve Early Breastfeeding, Behavioral	f. Low or Middle Income Country (LMIC)	b. Public health	b. Cluster randomized trial	4. No or unclear	1. Yes - PRO is primary or co-primary outcome	2. No	N/A	4. Health behaviours	7. NA - PROs not secondary	4. No	2. No	2. No	2. Yes, but not for (co)primary	10. Target difference not justified	N/A or unclear	4. NA		2. No	"2. Government, international agency, university","3. Foundation, special interest group"	Superiority	Frequentist
10472	2016	The Journal of Allergy & Clinical Immunology in Practice	7.55	No	No	Treatment	Propeller Health System (formerly Asthmapolis System), Device	b. USA	a. Clinical	a. Individually randomized trial (Skip Q12)	1. Yes, one primary	2. Yes - PRO is secondary (not primary outcome)	3. NA - trial does not have multiple co-primary outcomes		7. NA - PROs not primary	2. Functional status	6. NA - trial does not have PROs as primary outcome(s)	2. No	2. No	3. No	13. No SS calc	N/A or unclear	4. NA		4. NA - no sample size calculation	1. Industry,"3. Foundation, special interest group"	Superiority	Frequentist
10420	2016	Annals of the American Thoracic Society	4.026	No	No	Supportive Care	Physical activity self-management, Behavioral; COPD education + Usual care, Other	b. USA	a. Clinical	a. Individually randomized trial (Skip Q12)	2. Yes, two co-primaries	1. Yes - PRO is primary or co-primary outcome	1. Yes	Yes	3. Symptoms/symptom burden,2. Functional status	4. Health behaviours,2. Functional status	1. Yes, lit citation or explanation	2. No	2. No	1. Yes, for (co)primary	2. Distribution	important	1. PRO		1. Yes	"2. Government, international agency, university"	Superiority	Frequentist
8891	2016	New England Journal of Medicine	70.67	No	No	Health Services Research	flexible duty hours, Behavioral	b. USA	a. Clinical	b. Cluster randomized trial	2. Yes, two co-primaries	3. No - There are no PROs	2. No		7. NA - PROs not primary	7. NA - PROs not secondary	6. NA - trial does not have PROs as primary outcome(s)	2. No	1. Yes	1. Yes, for (co)primary	7. Pilot study or realistic difference	realistic	4. NA		2. No	"3. Foundation, special interest group"	Non-inferiority	Frequentist
9402	2016	Journal of Clinical Psychiatry	4.023	No	No	Treatment	Lithium, Drug; Quetiapine, Drug	b. USA	a. Clinical	a. Individually randomized trial (Skip Q12)	2. Yes, two co-primaries	2. Yes - PRO is secondary (not primary outcome)	2. No		7. NA - PROs not primary	1. HRQoL or QoL,2. Functional status,4. Health behaviours,3. Symptoms/symptom burden	6. NA - trial does not have PROs as primary outcome(s)	2. No	2. No	1. Yes, for (co)primary	4. Standardized effect size	N/A or unclear	4. NA		2. No	"2. Government, international agency, university"	Superiority	Frequentist
9252	2016	Depression & Anxiety	4.935	No	No	Treatment	DBT, Behavioral; CAMS, Behavioral	d. Other European Union (EU) country	a. Clinical	a. Individually randomized trial (Skip Q12)	1. Yes, one primary	1. Yes - PRO is primary or co-primary outcome	3. NA - trial does not have multiple co-primary outcomes	Yes	4. Health behaviours	3. Symptoms/symptom burden	4. No	2. No	2. No	1. Yes, for (co)primary	7. Pilot study or realistic difference	realistic	4. NA		2. No	"3. Foundation, special interest group","2. Government, international agency, university"	Superiority	Frequentist
9258	2016	Journal of Medical Internet Research	4.945	No	No	Treatment	Walkadoo, Behavioral	b. USA	b. Public health	a. Individually randomized trial (Skip Q12)	1. Yes, one primary	3. No - There are no PROs	3. NA - trial does not have multiple co-primary outcomes		7. NA - PROs not primary	7. NA - PROs not secondary	6. NA - trial does not have PROs as primary outcome(s)	2. No	2. No	3. No	13. No SS calc	N/A or unclear	4. NA		4. NA - no sample size calculation	1. Industry	Superiority	Frequentist
9501	2016	JAMA	51.273	No	No	Treatment	Accelerated Skill Acquisition Program (ASAP), Behavioral; Dose-Equivalent Usual & Customary Care - DEUCC, Behavioral; Usual and Customary Care - UCC, Behavioral	b. USA	a. Clinical	a. Individually randomized trial (Skip Q12)	1. Yes, one primary	2. Yes - PRO is secondary (not primary outcome)	3. NA - trial does not have multiple co-primary outcomes		7. NA - PROs not primary	2. Functional status,4. Health behaviours,6. Other (specify)	6. NA - trial does not have PROs as primary outcome(s)	2. No	2. No	1. Yes, for (co)primary	7. Pilot study or realistic difference	both	4. NA		1. Yes	"2. Government, international agency, university"	Superiority	Frequentist
9041	2016	Resuscitation	4.572	No	No	Prevention	Control group, Other; Increased monitoring frequency, Other	d. Other European Union (EU) country	a. Clinical	b. Cluster randomized trial	1. Yes, one primary	3. No - There are no PROs	3. NA - trial does not have multiple co-primary outcomes		7. NA - PROs not primary	7. NA - PROs not secondary	6. NA - trial does not have PROs as primary outcome(s)	2. No	2. No	1. Yes, for (co)primary	10. Target difference not justified	N/A or unclear	4. NA		1. Yes	"3. Foundation, special interest group","2. Government, international agency, university"	Superiority	Frequentist
8860	2016	Pediatrics	5.401	Yes	No	Health Services Research	Text Message Reminder/Recall, Behavioral; Parent Preference, Behavioral	b. USA	a. Clinical	b. Cluster randomized trial	1. Yes, one primary	3. No - There are no PROs	3. NA - trial does not have multiple co-primary outcomes		7. NA - PROs not primary	7. NA - PROs not secondary	6. NA - trial does not have PROs as primary outcome(s)	2. No	2. No	3. No	13. No SS calc	N/A or unclear	4. NA		4. NA - no sample size calculation	"2. Government, international agency, university"	Superiority	Frequentist
9529	2016	British Journal of Clinical Pharmacology	3.867	No	Yes	Treatment	E-learning, Other	d. Other European Union (EU) country	a. Clinical	b. Cluster randomized trial	1. Yes, one primary	3. No - There are no PROs	3. NA - trial does not have multiple co-primary outcomes		7. NA - PROs not primary	7. NA - PROs not secondary	6. NA - trial does not have PROs as primary outcome(s)	2. No	2. No	1. Yes, for (co)primary	10. Target difference not justified	N/A or unclear	4. NA		2. No	"2. Government, international agency, university"	Superiority	Frequentist
8884	2016	PLoS Medicine / Public Library of Science	11.048	No	No	Treatment	Attempted Suicide Short Intervention Program (ASSIP), Behavioral; Control Group (CG), Behavioral	g. Other developed	a. Clinical	a. Individually randomized trial (Skip Q12)	1. Yes, one primary	1. Yes - PRO is primary or co-primary outcome	3. NA - trial does not have multiple co-primary outcomes		3. Symptoms/symptom burden	3. Symptoms/symptom burden,5. Patient experience	4. No	2. No	2. No	1. Yes, for (co)primary	7. Pilot study or realistic difference	realistic	4. NA		2. No	6. No funding	Superiority	Frequentist
8707	2016	Implementation Science	4.525	No	Yes		Implementation intervention, Other	g. Other developed	a. Clinical	b. Cluster randomized trial	1. Yes, one primary	2. Yes - PRO is secondary (not primary outcome)	3. NA - trial does not have multiple co-primary outcomes		7. NA - PROs not primary	2. Functional status,3. Symptoms/symptom burden,4. Health behaviours,6. Other (specify)	6. NA - trial does not have PROs as primary outcome(s)	2. No	2. No	1. Yes, for (co)primary	10. Target difference not justified	N/A or unclear	4. NA		2. No	"2. Government, international agency, university"	Superiority	Frequentist
9467	2016	Lancet	59.102	No	No	Diagnostic	Urine LAM strip test, Device	f. Low or Middle Income Country (LMIC) ,g. Other developed	a. Clinical	a. Individually randomized trial (Skip Q12)	1. Yes, one primary	3. No - There are no PROs	3. NA - trial does not have multiple co-primary outcomes		7. NA - PROs not primary	7. NA - PROs not secondary	6. NA - trial does not have PROs as primary outcome(s)	2. No	2. No	1. Yes, for (co)primary	10. Target difference not justified	N/A or unclear	4. NA		2. No	"3. Foundation, special interest group"	Superiority	Frequentist
8763	2016	New England Journal of Medicine	70.67	No	No	Health Services Research	DQIP Intervention, Behavioral	d. Other European Union (EU) country	a. Clinical	b. Cluster randomized trial	1. Yes, one primary	3. No - There are no PROs	3. NA - trial does not have multiple co-primary outcomes		7. NA - PROs not primary	7. NA - PROs not secondary	6. NA - trial does not have PROs as primary outcome(s)	2. No	2. No	1. Yes, for (co)primary	7. Pilot study or realistic difference,6. Evidence review	realistic	4. NA		2. No	"2. Government, international agency, university"	Superiority	Frequentist
9229	2016	International Journal of Behavioral Nutrition & Physical Activity	6.037	No	No	Prevention	SipSmarter, Behavioral; MoveMore, Behavioral	b. USA	b. Public health	a. Individually randomized trial (Skip Q12)	4. No or unclear	2. Yes - PRO is secondary (not primary outcome)	3. NA - trial does not have multiple co-primary outcomes		7. NA - PROs not primary	1. HRQoL or QoL	6. NA - trial does not have PROs as primary outcome(s)	2. No	2. No	2. Yes, but not for (co)primary	4. Standardized effect size	N/A or unclear	4. NA	0.34	2. No	"2. Government, international agency, university","3. Foundation, special interest group"	Superiority	Frequentist
9621	2016	Journal of Clinical Oncology	28.245	No	No	Treatment	acupuncture, Device; self care, Other	b. USA	a. Clinical	a. Individually randomized trial (Skip Q12)	1. Yes, one primary	1. Yes - PRO is primary or co-primary outcome	3. NA - trial does not have multiple co-primary outcomes		3. Symptoms/symptom burden	3. Symptoms/symptom burden,1. HRQoL or QoL,4. Health behaviours	4. No	2. No	1. Yes	1. Yes, for (co)primary	10. Target difference not justified	N/A or unclear	4. NA		1. Yes	"2. Government, international agency, university"	Superiority	Frequentist
9619	2016	Menopause	2.942	No	No	Treatment	Acupuncture, Procedure	b. USA	b. Public health	a. Individually randomized trial (Skip Q12)	1. Yes, one primary	1. Yes - PRO is primary or co-primary outcome	3. NA - trial does not have multiple co-primary outcomes		3. Symptoms/symptom burden	1. HRQoL or QoL,2. Functional status,3. Symptoms/symptom burden	4. No	2. No	2. No	3. No	13. No SS calc	N/A or unclear	4. NA		4. NA - no sample size calculation	"2. Government, international agency, university"	Superiority	Frequentist
9087	2016	Lancet	59.102	No	No	Treatment	Atripla (r), Drug; Efavirenz, Drug; Truvada, Drug; Rifampin/isoniazid/pyrazinamide/ethambutol FDC, Drug; Rifampin/isoniazid FDC, Drug; Isoniazid, Drug	f. Low or Middle Income Country (LMIC)	a. Clinical	a. Individually randomized trial (Skip Q12)	1. Yes, one primary	3. No - There are no PROs	3. NA - trial does not have multiple co-primary outcomes		7. NA - PROs not primary	7. NA - PROs not secondary	6. NA - trial does not have PROs as primary outcome(s)	2. No	2. No	1. Yes, for (co)primary	10. Target difference not justified	N/A or unclear	4. NA		2. No	"2. Government, international agency, university",1. Industry	Superiority	Frequentist
4055	2016	PLoS ONE [Electronic Resource]	2.776	No	No	Treatment	Acupuncture, Device	c. UK	a. Clinical	a. Individually randomized trial (Skip Q12)	1. Yes, one primary	1. Yes - PRO is primary or co-primary outcome	3. NA - trial does not have multiple co-primary outcomes		3. Symptoms/symptom burden	5. Patient experience,3. Symptoms/symptom burden	1. Yes, lit citation or explanation	2. No	2. No	1. Yes, for (co)primary	6. Evidence review,5. Stakeholder/patient opinion	both	4. NA	0.35	1. Yes	"2. Government, international agency, university"	Superiority	Frequentist
1804	2016	General Hospital Psychiatry	3.22	No	No	Treatment	Supported self-care, Behavioral; Unsupported self-care, Behavioral	a. Canada	a. Clinical	a. Individually randomized trial (Skip Q12)	1. Yes, one primary	1. Yes - PRO is primary or co-primary outcome	3. NA - trial does not have multiple co-primary outcomes		3. Symptoms/symptom burden	5. Patient experience,6. Other (specify),4. Health behaviours	4. No	2. No	2. No	1. Yes, for (co)primary	10. Target difference not justified	N/A or unclear	4. NA		1. Yes	"2. Government, international agency, university"	Superiority	Frequentist
9002	2016	Journal of Acquired Immune Deficiency Syndromes: JAIDS	3.863	No	No	Health Services Research	pMTCT systems analysis and improvement, Other	f. Low or Middle Income Country (LMIC)	a. Clinical	b. Cluster randomized trial	2. Yes, two co-primaries	3. No - There are no PROs	2. No		7. NA - PROs not primary	7. NA - PROs not secondary	6. NA - trial does not have PROs as primary outcome(s)	2. No	2. No	3. No	13. No SS calc	N/A or unclear	4. NA		4. NA - no sample size calculation	"2. Government, international agency, university","3. Foundation, special interest group"	Superiority	Frequentist
9468	2016	PLoS ONE [Electronic Resource]	2.776	No	No	Health Services Research	community health workers, Behavioral	f. Low or Middle Income Country (LMIC)	b. Public health	b. Cluster randomized trial	1. Yes, one primary	2. Yes - PRO is secondary (not primary outcome)	3. NA - trial does not have multiple co-primary outcomes		7. NA - PROs not primary	4. Health behaviours	6. NA - trial does not have PROs as primary outcome(s)	2. No	2. No	1. Yes, for (co)primary	10. Target difference not justified	N/A or unclear	4. NA		1. Yes	"2. Government, international agency, university"	Superiority	Frequentist
9114	2016	British Journal of Anaesthesia	6.199	No	No	Prevention	SARI, Procedure	d. Other European Union (EU) country	a. Clinical	b. Cluster randomized trial	2. Yes, two co-primaries	3. No - There are no PROs	2. No		7. NA - PROs not primary	7. NA - PROs not secondary	6. NA - trial does not have PROs as primary outcome(s)	2. No	2. No	1. Yes, for (co)primary	10. Target difference not justified	both	4. NA		2. No	"2. Government, international agency, university","3. Foundation, special interest group"	Superiority	Frequentist
8993	2016	American Journal of Respiratory & Critical Care Medicine	16.494	No	No	Health Services Research	Quality improvement, Behavioral	a. Canada	a. Clinical	b. Cluster randomized trial	1. Yes, one primary	3. No - There are no PROs	3. NA - trial does not have multiple co-primary outcomes		7. NA - PROs not primary	7. NA - PROs not secondary	6. NA - trial does not have PROs as primary outcome(s)	2. No	2. No	1. Yes, for (co)primary	7. Pilot study or realistic difference	realistic	4. NA		2. No	"2. Government, international agency, university"	Superiority	Frequentist
4284	2016	Clinical Infectious Diseases	9.055	No	No	Screening	Conventional Video, Behavioral; Crowdsourced Video, Behavioral	g. Other developed	b. Public health	a. Individually randomized trial (Skip Q12)	1. Yes, one primary	1. Yes - PRO is primary or co-primary outcome	3. NA - trial does not have multiple co-primary outcomes		4. Health behaviours	7. NA - PROs not secondary	1. Yes, lit citation or explanation	2. No	1. Yes	3. No	13. No SS calc	N/A or unclear	4. NA		4. NA - no sample size calculation	"2. Government, international agency, university"	Non-inferiority	Frequentist
9457	2016	Lancet	59.102	No	No	Diagnostic	Office hysteroscopy (in combination with a 'Saline Infusion Sonography'(SIS)), Procedure	d. Other European Union (EU) country	a. Clinical	a. Individually randomized trial (Skip Q12)	1. Yes, one primary	2. Yes - PRO is secondary (not primary outcome)	3. NA - trial does not have multiple co-primary outcomes		7. NA - PROs not primary	5. Patient experience	6. NA - trial does not have PROs as primary outcome(s)	2. No	2. No	1. Yes, for (co)primary	10. Target difference not justified	N/A or unclear	4. NA		1. Yes	"2. Government, international agency, university"	Superiority	Frequentist
9533	2016	Journal of Women's Health	2.009	No	No	Prevention	Public Health Nurse Home Visit, Behavioral; Intimate Partner Violence (IPV) Protocol, Behavioral	b. USA	b. Public health	b. Cluster randomized trial	1. Yes, one primary	1. Yes - PRO is primary or co-primary outcome	3. NA - trial does not have multiple co-primary outcomes	Yes	6. Other (specify)	3. Symptoms/symptom burden	4. No	2. No	2. No	1. Yes, for (co)primary	6. Evidence review,4. Standardized effect size	realistic	4. NA		1. Yes	"2. Government, international agency, university"	Superiority	Frequentist
9224	2016	Psychotherapy & Psychosomatics	13.744	No	No	Treatment	Deprexis, Behavioral	d. Other European Union (EU) country	a. Clinical	a. Individually randomized trial (Skip Q12)	1. Yes, one primary	1. Yes - PRO is primary or co-primary outcome	3. NA - trial does not have multiple co-primary outcomes		3. Symptoms/symptom burden	3. Symptoms/symptom burden,1. HRQoL or QoL	4. No	2. No	2. No	1. Yes, for (co)primary	6. Evidence review,4. Standardized effect size	both	4. NA	cohen's d=0.23 / 5 point reduction on PHQ-9	1. Yes	"2. Government, international agency, university"	Superiority	Frequentist
9376	2016	JAMA Internal Medicine	20.768	No	No	Treatment	STEPS UP, Behavioral; OUC, Behavioral	b. USA	a. Clinical	a. Individually randomized trial (Skip Q12)	2. Yes, two co-primaries	1. Yes - PRO is primary or co-primary outcome	2. No		3. Symptoms/symptom burden	1. HRQoL or QoL,3. Symptoms/symptom burden,4. Health behaviours	4. No	2. No	2. No	1. Yes, for (co)primary	10. Target difference not justified	N/A or unclear	4. NA		1. Yes	"2. Government, international agency, university","3. Foundation, special interest group"	Superiority	Frequentist
9530	2016	Translational Behavioral Medicine	2.237	No	No	Health Services Research	IVR-Enhanced Care, Behavioral	b. USA	a. Clinical	a. Individually randomized trial (Skip Q12)	1. Yes, one primary	1. Yes - PRO is primary or co-primary outcome	3. NA - trial does not have multiple co-primary outcomes	Yes	6. Other (specify)	6. Other (specify)	1. Yes, lit citation or explanation	2. No	2. No	1. Yes, for (co)primary	10. Target difference not justified	N/A or unclear	4. NA		2. No	"2. Government, international agency, university"	Superiority	Frequentist
9437	2016	Translational Behavioral Medicine	2.237	No	No	Prevention	Implementation of the MOHR assessment in primary care workflow, Other	b. USA	a. Clinical	b. Cluster randomized trial	4. No or unclear	1. Yes - PRO is primary or co-primary outcome	2. No		4. Health behaviours	5. Patient experience	4. No	3. Unclear or other (specify)	3. Unclear or other (specify)	3. No	13. No SS calc	N/A or unclear	4. NA		4. NA - no sample size calculation	"2. Government, international agency, university"	Superiority	Frequentist
8854	2016	Osteoporosis International	3.819	No	No	Health Services Research	Bone Mineral Density Result Letter and Bone Health Brochure, Behavioral	b. USA	a. Clinical	a. Individually randomized trial (Skip Q12)	1. Yes, one primary	1. Yes - PRO is primary or co-primary outcome	3. NA - trial does not have multiple co-primary outcomes	Yes	4. Health behaviours	7. NA - PROs not secondary	3. Yes, other stakeholder consultation	2. No	2. No	1. Yes, for (co)primary	10. Target difference not justified	N/A or unclear	4. NA		2. No	"2. Government, international agency, university"	Superiority	Frequentist
6700	2017	Telemedicine Journal & E-Health	1.996	No	No	Supportive Care	Self-monitoring for patients with Dibetes mellitus, Other	d. Other European Union (EU) country	a. Clinical	a. Individually randomized trial (Skip Q12)	1. Yes, one primary	1. Yes - PRO is primary or co-primary outcome	3. NA - trial does not have multiple co-primary outcomes		1. HRQoL or QoL	3. Symptoms/symptom burden	4. No	2. No	2. No	1. Yes, for (co)primary	4. Standardized effect size	N/A or unclear	4. NA	0.5	1. Yes	5. Not specified	Superiority	Frequentist
8835	2016	International Journal of Copd	3.274	No	No	Prevention	Discontinuation of Antibiotcs, Other	d. Other European Union (EU) country	a. Clinical	a. Individually randomized trial (Skip Q12)	1. Yes, one primary	3. No - There are no PROs	3. NA - trial does not have multiple co-primary outcomes		7. NA - PROs not primary	7. NA - PROs not secondary	6. NA - trial does not have PROs as primary outcome(s)	2. No	2. No	1. Yes, for (co)primary	6. Evidence review	realistic	4. NA		2. No	1. Industry	Superiority	Frequentist
9264	2016	Annals of Internal Medicine	19.315	No	No	Prevention	Care Coordinator + Decision Support Software, Other; Usual care, Other	f. Low or Middle Income Country (LMIC)	a. Clinical	a. Individually randomized trial (Skip Q12)	2. Yes, two co-primaries	2. Yes - PRO is secondary (not primary outcome)	2. No		7. NA - PROs not primary	1. HRQoL or QoL,5. Patient experience	6. NA - trial does not have PROs as primary outcome(s)	2. No	1. Yes	1. Yes, for (co)primary	10. Target difference not justified	N/A or unclear	4. NA		1. Yes	"2. Government, international agency, university",1. Industry	Superiority	Frequentist
7344	2017	Journal of General Internal Medicine	4.606	No	No	Supportive Care	Case Management, Other	g. Other developed	a. Clinical	a. Individually randomized trial (Skip Q12)	1. Yes, one primary	3. No - There are no PROs	3. NA - trial does not have multiple co-primary outcomes		7. NA - PROs not primary	7. NA - PROs not secondary	6. NA - trial does not have PROs as primary outcome(s)	2. No	2. No	1. Yes, for (co)primary	6. Evidence review	realistic	4. NA	2 ED visits annually	1. Yes	"2. Government, international agency, university"	Superiority	Frequentist
9495	2016	Critical Care Medicine	6.971	No	No	Prevention	Chlorhexidine gluconate, Drug; Standard bathing, Other	b. USA	a. Clinical	a. Individually randomized trial (Skip Q12)	1. Yes, one primary	3. No - There are no PROs	3. NA - trial does not have multiple co-primary outcomes		7. NA - PROs not primary	7. NA - PROs not secondary	6. NA - trial does not have PROs as primary outcome(s)	2. No	2. No	1. Yes, for (co)primary	10. Target difference not justified	N/A or unclear	4. NA		2. No	"3. Foundation, special interest group"	Superiority	Frequentist
9432	2016	BMC Family Practice	2.431	No	No		Therapeutic education, Procedure	d. Other European Union (EU) country	a. Clinical	b. Cluster randomized trial	4. No or unclear	1. Yes - PRO is primary or co-primary outcome	3. NA - trial does not have multiple co-primary outcomes		1. HRQoL or QoL	7. NA - PROs not secondary	4. No	2. No	2. No	1. Yes, for (co)primary	10. Target difference not justified	N/A or unclear	4. NA		1. Yes	1. Industry,"2. Government, international agency, university"	Superiority	Frequentist
8255	2016	Canadian Journal of Anaesthesia	3.374	No	No	Treatment	Volatile anesthetic, Drug	a. Canada	a. Clinical	a. Individually randomized trial (Skip Q12)	1. Yes, one primary	3. No - There are no PROs	3. NA - trial does not have multiple co-primary outcomes		7. NA - PROs not primary	7. NA - PROs not secondary	6. NA - trial does not have PROs as primary outcome(s)	2. No	2. No	1. Yes, for (co)primary	10. Target difference not justified	N/A or unclear	4. NA		2. No	"2. Government, international agency, university"	Non-inferiority	Frequentist
7040	2017	Gaceta Sanitaria	1.656	No	No	Prevention	Face-to-face, Other; Face-to-face intervention plus telephone reinforcement, Other	d. Other European Union (EU) country	a. Clinical	b. Cluster randomized trial	1. Yes, one primary	3. No - There are no PROs	3. NA - trial does not have multiple co-primary outcomes		7. NA - PROs not primary	7. NA - PROs not secondary	6. NA - trial does not have PROs as primary outcome(s)	2. No	2. No	2. Yes, but not for (co)primary	10. Target difference not justified	N/A or unclear	4. NA		2. No	"2. Government, international agency, university"	Superiority	Frequentist
8017	2016	American Journal of Gastroenterology	10.241	No	No	Health Services Research	FIT Invitation Only, Other; FIT plus Incentive, Other	b. USA	b. Public health	a. Individually randomized trial (Skip Q12)	1. Yes, one primary	3. No - There are no PROs	3. NA - trial does not have multiple co-primary outcomes		7. NA - PROs not primary	7. NA - PROs not secondary	6. NA - trial does not have PROs as primary outcome(s)	2. No	2. No	1. Yes, for (co)primary	10. Target difference not justified	N/A or unclear	4. NA		2. No	"2. Government, international agency, university"	Superiority	Frequentist
8571	2016	BMJ	27.604	No	No	Prevention	Usual care, Other; Feedback of Performance, Other; Feedback of Performance + Health Psychology Informed Intervention, Other	d. Other European Union (EU) country	a. Clinical	b. Cluster randomized trial	1. Yes, one primary	3. No - There are no PROs	3. NA - trial does not have multiple co-primary outcomes		7. NA - PROs not primary	7. NA - PROs not secondary	6. NA - trial does not have PROs as primary outcome(s)	2. No	2. No	1. Yes, for (co)primary	7. Pilot study or realistic difference	realistic	4. NA		2. No	"2. Government, international agency, university"	Superiority	Frequentist
7829	2016	Journal of General Internal Medicine	4.606	No	No		Enhanced Label, Other	b. USA	a. Clinical	a. Individually randomized trial (Skip Q12)	1. Yes, one primary	1. Yes - PRO is primary or co-primary outcome	3. NA - trial does not have multiple co-primary outcomes	Yes	4. Health behaviours	4. Health behaviours	1. Yes, lit citation or explanation	2. No	2. No	3. No	13. No SS calc	N/A or unclear	4. NA		4. NA - no sample size calculation	"2. Government, international agency, university"	Superiority	Frequentist
6941	2017	Addiction	6.851	No	No	Treatment	Usual care, Behavioral; Reduction, Behavioral; 5Rs, Behavioral	b. USA	b. Public health	a. Individually randomized trial (Skip Q12)	1. Yes, one primary	1. Yes - PRO is primary or co-primary outcome	3. NA - trial does not have multiple co-primary outcomes		4. Health behaviours	4. Health behaviours	4. No	2. No	2. No	1. Yes, for (co)primary	7. Pilot study or realistic difference	realistic	4. NA		2. No	"2. Government, international agency, university"	Superiority	Frequentist
8501	2016	JAMA	51.273	No	No	Diagnostic	3T CMR, Other; SPECT, Other; CT calcium score, Other; CT coronary angiography, Other; X-Ray coronary angiography, Other	c. UK	a. Clinical	a. Individually randomized trial (Skip Q12)	1. Yes, one primary	3. No - There are no PROs	3. NA - trial does not have multiple co-primary outcomes		7. NA - PROs not primary	7. NA - PROs not secondary	6. NA - trial does not have PROs as primary outcome(s)	1. Yes	2. No	1. Yes, for (co)primary	10. Target difference not justified	N/A or unclear	4. NA		1. Yes	"2. Government, international agency, university"	Superiority	Frequentist
8291	2016	Pharmacotherapy:The Journal of Human Pharmacology & Drug Therapy	3.045	No	No	Health Services Research	CPATCH intervention to support statin adherence, Behavioral	a. Canada	a. Clinical	b. Cluster randomized trial	1. Yes, one primary	3. No - There are no PROs	3. NA - trial does not have multiple co-primary outcomes		7. NA - PROs not primary	7. NA - PROs not secondary	6. NA - trial does not have PROs as primary outcome(s)	2. No	1. Yes	1. Yes, for (co)primary	10. Target difference not justified	N/A or unclear	4. NA		2. No	1. Industry,"2. Government, international agency, university"	Superiority	Frequentist
6649	2017	Diabetic Medicine	3.107	No	No	Prevention	Structured Education, Behavioral; Written Information, Behavioral	c. UK	a. Clinical	b. Cluster randomized trial	1. Yes, one primary	2. Yes - PRO is secondary (not primary outcome)	3. NA - trial does not have multiple co-primary outcomes		7. NA - PROs not primary	1. HRQoL or QoL,3. Symptoms/symptom burden,4. Health behaviours,6. Other (specify)	6. NA - trial does not have PROs as primary outcome(s)	2. No	1. Yes	1. Yes, for (co)primary	7. Pilot study or realistic difference	realistic	4. NA		1. Yes	"2. Government, international agency, university"	Superiority	Frequentist
7317	2017	American Journal of Preventive Medicine	4.435	No	No	Prevention	Intervention, Other	b. USA	a. Clinical	b. Cluster randomized trial	4. No or unclear	1. Yes - PRO is primary or co-primary outcome	2. No	N/A	4. Health behaviours,6. Other (specify)	7. NA - PROs not secondary	4. No	2. No	2. No	3. No	13. No SS calc	N/A or unclear	4. NA		4. NA - no sample size calculation	"2. Government, international agency, university"	Superiority	Frequentist
7801	2016	Circulation	23.054	No	No	Diagnostic	POC-based transfusion algorithm, Other	a. Canada	a. Clinical	b. Cluster randomized trial	1. Yes, one primary	3. No - There are no PROs	3. NA - trial does not have multiple co-primary outcomes		7. NA - PROs not primary	7. NA - PROs not secondary	6. NA - trial does not have PROs as primary outcome(s)	2. No	2. No	1. Yes, for (co)primary	9. Calculated the detectable difference given sample size	N/A or unclear	4. NA		2. No	1. Industry,"2. Government, international agency, university"	Superiority	Frequentist
2122	2016	JAMA	51.273	No	No	Treatment	infliximab, etanercept, adalimumab, Drug; abatacept, rituximab or tocilizumab, Drug	d. Other European Union (EU) country	a. Clinical	a. Individually randomized trial (Skip Q12)	1. Yes, one primary	1. Yes - PRO is primary or co-primary outcome	3. NA - trial does not have multiple co-primary outcomes	Yes	3. Symptoms/symptom burden,2. Functional status	3. Symptoms/symptom burden,2. Functional status,4. Health behaviours	4. No	2. No	2. No	1. Yes, for (co)primary	6. Evidence review	realistic	4. NA		2. No	"2. Government, international agency, university"	Superiority	Frequentist
3171	2016	The Lancet. HIV	14.753	No	No	Treatment	START, Behavioral	f. Low or Middle Income Country (LMIC)	a. Clinical	b. Cluster randomized trial	1. Yes, one primary	3. No - There are no PROs	3. NA - trial does not have multiple co-primary outcomes		7. NA - PROs not primary	7. NA - PROs not secondary	6. NA - trial does not have PROs as primary outcome(s)	2. No	2. No	2. Yes, but not for (co)primary	10. Target difference not justified	N/A or unclear	4. NA		2. No	"2. Government, international agency, university"	Superiority	Frequentist
2051	2016	PLoS ONE [Electronic Resource]	2.776	No	No	Basic Science	therapeutic education program, Behavioral	d. Other European Union (EU) country	a. Clinical	a. Individually randomized trial (Skip Q12)	1. Yes, one primary	1. Yes - PRO is primary or co-primary outcome	3. NA - trial does not have multiple co-primary outcomes		1. HRQoL or QoL	1. HRQoL or QoL,3. Symptoms/symptom burden,2. Functional status	4. No	2. No	2. No	1. Yes, for (co)primary	7. Pilot study or realistic difference	realistic	4. NA	0.52	1. Yes	"2. Government, international agency, university"	Superiority	Frequentist
6891	2017	Arthritis care & research	4.53	No	No	Other	standardized reeducation and readaptation program, Procedure	d. Other European Union (EU) country	a. Clinical	a. Individually randomized trial (Skip Q12)	1. Yes, one primary	1. Yes - PRO is primary or co-primary outcome	3. NA - trial does not have multiple co-primary outcomes		2. Functional status	2. Functional status,1. HRQoL or QoL,4. Health behaviours,6. Other (specify),3. Symptoms/symptom burden	4. No	3. Unclear or other (specify)	3. Unclear or other (specify)	1. Yes, for (co)primary	10. Target difference not justified	N/A or unclear	4. NA	0.4	1. Yes	"2. Government, international agency, university"	Superiority	Frequentist
6698	2017	Journal of General Internal Medicine	4.606	No	No	Treatment	Telephone-based collaborative care, Behavioral; Usual care, Behavioral	b. USA	a. Clinical	a. Individually randomized trial (Skip Q12)	1. Yes, one primary	1. Yes - PRO is primary or co-primary outcome	3. NA - trial does not have multiple co-primary outcomes	Yes	1. HRQoL or QoL	3. Symptoms/symptom burden	4. No	2. No	2. No	1. Yes, for (co)primary	4. Standardized effect size	realistic	4. NA		1. Yes	"2. Government, international agency, university"	Superiority	Frequentist
7306	2017	Academic Emergency Medicine	2.963	No	No	Treatment	Cognitive rest, Other; Usual care, Other	a. Canada	a. Clinical	a. Individually randomized trial (Skip Q12)	1. Yes, one primary	1. Yes - PRO is primary or co-primary outcome	3. NA - trial does not have multiple co-primary outcomes		3. Symptoms/symptom burden	3. Symptoms/symptom burden,6. Other (specify)	4. No	2. No	2. No	1. Yes, for (co)primary	10. Target difference not justified	important	4. NA	10 points on PCSS	1. Yes	"3. Foundation, special interest group"	Superiority	Frequentist
7677	2016	BMC Psychiatry	2.666	No	No	Treatment	Venlafaxine, Drug; Sertraline, Drug	d. Other European Union (EU) country	a. Clinical	a. Individually randomized trial (Skip Q12)	1. Yes, one primary	1. Yes - PRO is primary or co-primary outcome	3. NA - trial does not have multiple co-primary outcomes	Yes	3. Symptoms/symptom burden	3. Symptoms/symptom burden,1. HRQoL or QoL,2. Functional status	4. No	2. No	2. No	3. No	13. No SS calc	N/A or unclear	4. NA		4. NA - no sample size calculation	"2. Government, international agency, university","3. Foundation, special interest group"	Superiority	Frequentist
7396	2017	Nicotine & Tobacco Research	3.786	No	No	Treatment	WEB, Behavioral; Social Network, Behavioral; Nicotine Replacement Therapy (NRT), Behavioral	b. USA	b. Public health	a. Individually randomized trial (Skip Q12)	4. No or unclear	2. Yes - PRO is secondary (not primary outcome)	3. NA - trial does not have multiple co-primary outcomes		7. NA - PROs not primary	4. Health behaviours	6. NA - trial does not have PROs as primary outcome(s)	2. No	2. No	3. No	13. No SS calc	N/A or unclear	4. NA		4. NA - no sample size calculation	"2. Government, international agency, university"	Superiority	Frequentist
8218	2016	BMC Family Practice	2.431	No	No	Health Services Research	EMPOWER-PAR Intervention, Other	f. Low or Middle Income Country (LMIC)	a. Clinical	b. Cluster randomized trial	1. Yes, one primary	3. No - There are no PROs	3. NA - trial does not have multiple co-primary outcomes		7. NA - PROs not primary	7. NA - PROs not secondary	6. NA - trial does not have PROs as primary outcome(s)	2. No	2. No	1. Yes, for (co)primary	7. Pilot study or realistic difference	realistic	4. NA		1. Yes	"2. Government, international agency, university"	Superiority	Frequentist
4196	2016	BMJ Open	2.376	No	No	Health Services Research	Email message regarding the HealthyFood benefit, Other	g. Other developed	b. Public health	a. Individually randomized trial (Skip Q12)	1. Yes, one primary	3. No - There are no PROs	3. NA - trial does not have multiple co-primary outcomes		7. NA - PROs not primary	7. NA - PROs not secondary	6. NA - trial does not have PROs as primary outcome(s)	2. No	2. No	1. Yes, for (co)primary	9. Calculated the detectable difference given sample size	N/A or unclear	4. NA		1. Yes	1. Industry	Superiority	Frequentist
7375	2017	The Lancet. HIV	14.753	No	No	Health Services Research	Assisted-partner notification services, Other	f. Low or Middle Income Country (LMIC)	b. Public health	b. Cluster randomized trial	2. Yes, two co-primaries	1. Yes - PRO is primary or co-primary outcome	1. Yes	Yes	4. Health behaviours,6. Other (specify)	7. NA - PROs not secondary	4. No	2. No	2. No	1. Yes, for (co)primary	10. Target difference not justified	N/A or unclear	2. Clinical outcome		2. No	"2. Government, international agency, university"	Superiority	Frequentist
8105	2016	BMJ	27.604	No	No	Health Services Research	Chest Pain Choice Decision Aid, Other	b. USA	a. Clinical	a. Individually randomized trial (Skip Q12)	1. Yes, one primary	1. Yes - PRO is primary or co-primary outcome	3. NA - trial does not have multiple co-primary outcomes	Yes	6. Other (specify)	5. Patient experience	2. Yes, patient consultation	1. Yes	1. Yes	1. Yes, for (co)primary	10. Target difference not justified	N/A or unclear	4. NA		1. Yes	"2. Government, international agency, university"	Superiority	Frequentist
7968	2016	International Journal of Copd	3.274	No	No	Health Services Research	COPD evidence based care pathway, Other	d. Other European Union (EU) country	a. Clinical	b. Cluster randomized trial	1. Yes, one primary	1. Yes - PRO is primary or co-primary outcome	3. NA - trial does not have multiple co-primary outcomes	Yes	6. Other (specify)	6. Other (specify)	4. No	2. No	2. No	1. Yes, for (co)primary	7. Pilot study or realistic difference	realistic	4. NA		2. No	1. Industry,"2. Government, international agency, university"	Superiority	Frequentist
8213	2016	PLoS ONE [Electronic Resource]	2.776	No	No	Prevention	High-risk patient standardized management package, Behavioral; Community based salt reduction program, Behavioral	g. Other developed	b. Public health	b. Cluster randomized trial	1. Yes, one primary	3. No - There are no PROs	3. NA - trial does not have multiple co-primary outcomes		7. NA - PROs not primary	7. NA - PROs not secondary	6. NA - trial does not have PROs as primary outcome(s)	2. No	2. No	1. Yes, for (co)primary	10. Target difference not justified	N/A or unclear	4. NA		2. No	"2. Government, international agency, university","3. Foundation, special interest group"	Superiority	Frequentist
7354	2017	American Journal of Preventive Medicine	4.435	No	No	Health Services Research	Physical activity prescription to develop program in group., Behavioral	f. Low or Middle Income Country (LMIC)	a. Clinical	b. Cluster randomized trial	1. Yes, one primary	2. Yes - PRO is secondary (not primary outcome)	3. NA - trial does not have multiple co-primary outcomes		7. NA - PROs not primary	6. Other (specify)	6. NA - trial does not have PROs as primary outcome(s)	2. No	2. No	1. Yes, for (co)primary	6. Evidence review	realistic	4. NA		1. Yes	"2. Government, international agency, university"	Superiority	Frequentist
6694	2017	Cancer	6.102	No	No	Screening	Lifestyle, screening, Behavioral	b. USA	b. Public health	a. Individually randomized trial (Skip Q12)	1. Yes, one primary	3. No - There are no PROs	3. NA - trial does not have multiple co-primary outcomes		7. NA - PROs not primary	7. NA - PROs not secondary	6. NA - trial does not have PROs as primary outcome(s)	1. Yes	1. Yes	3. No	13. No SS calc	N/A or unclear	4. NA		4. NA - no sample size calculation	"2. Government, international agency, university"	Superiority	Frequentist
7170	2017	Pediatrics	5.401	Yes	No	Diagnostic	Cord care by simple debridement (soaping, rinsing and drying), Other; Cord care with the use of antiseptics, Other	d. Other European Union (EU) country	a. Clinical	b. Cluster randomized trial	1. Yes, one primary	2. Yes - PRO is secondary (not primary outcome)	3. NA - trial does not have multiple co-primary outcomes		7. NA - PROs not primary	5. Patient experience	6. NA - trial does not have PROs as primary outcome(s)	2. No	2. No	1. Yes, for (co)primary	10. Target difference not justified	N/A or unclear	4. NA		2. No	"3. Foundation, special interest group"	Non-inferiority	Frequentist
8385	2016	CMAJ open		No	No	Supportive Care	Support, management, educational, counselling, follow-up, Behavioral	a. Canada	a. Clinical	a. Individually randomized trial (Skip Q12)	1. Yes, one primary	1. Yes - PRO is primary or co-primary outcome	3. NA - trial does not have multiple co-primary outcomes		6. Other (specify)	1. HRQoL or QoL,3. Symptoms/symptom burden,4. Health behaviours,6. Other (specify)	4. No	2. No	2. No	1. Yes, for (co)primary	9. Calculated the detectable difference given sample size	realistic	4. NA		1. Yes	1. Industry,"2. Government, international agency, university"	Superiority	Frequentist
6890	2017	JAMA Internal Medicine	20.768	No	No	Health Services Research	Antibiotic prescription feedback, Behavioral; No Feedback, Behavioral	g. Other developed	a. Clinical	b. Cluster randomized trial	1. Yes, one primary	3. No - There are no PROs	3. NA - trial does not have multiple co-primary outcomes		7. NA - PROs not primary	7. NA - PROs not secondary	6. NA - trial does not have PROs as primary outcome(s)	2. No	2. No	1. Yes, for (co)primary	10. Target difference not justified	N/A or unclear	4. NA		2. No	1. Industry,"2. Government, international agency, university"	Superiority	Frequentist
6873	2017	Journal of Consulting & Clinical Psychology	4.358	No	No	Treatment	Behavioral activation psychotherapy, Behavioral; Usual care, Other	b. USA	a. Clinical	a. Individually randomized trial (Skip Q12)	1. Yes, one primary	1. Yes - PRO is primary or co-primary outcome	3. NA - trial does not have multiple co-primary outcomes	Yes	3. Symptoms/symptom burden	3. Symptoms/symptom burden,2. Functional status,5. Patient experience,6. Other (specify)	1. Yes, lit citation or explanation	2. No	2. No	1. Yes, for (co)primary	4. Standardized effect size	N/A or unclear	4. NA		1. Yes	"2. Government, international agency, university"	Superiority	Frequentist
6072	2017	The Lancet Infectious Diseases	27.516	No	No	Diagnostic	GeneXpert MTB/RIF assay, Procedure; Smear microscopy, Procedure	f. Low or Middle Income Country (LMIC)	b. Public health	a. Individually randomized trial (Skip Q12)	1. Yes, one primary	3. No - There are no PROs	3. NA - trial does not have multiple co-primary outcomes		7. NA - PROs not primary	7. NA - PROs not secondary	6. NA - trial does not have PROs as primary outcome(s)	1. Yes	2. No	1. Yes, for (co)primary	10. Target difference not justified	N/A or unclear	4. NA		2. No	"2. Government, international agency, university"	Superiority	Frequentist
5796	2017	Journal of Investigative Medicine	1.994	No	No	Diagnostic	nasogastric tube placement, Procedure	b. USA	a. Clinical	a. Individually randomized trial (Skip Q12)	1. Yes, one primary	3. No - There are no PROs	3. NA - trial does not have multiple co-primary outcomes		7. NA - PROs not primary	7. NA - PROs not secondary	6. NA - trial does not have PROs as primary outcome(s)	2. No	2. No	1. Yes, for (co)primary	6. Evidence review	realistic	4. NA		2. No	5. Not specified	Non-inferiority	Frequentist
5907	2017	Ajnr: American Journal of Neuroradiology	3.256	No	No	Treatment	endovascular coil embolization, Procedure	a. Canada ,b. USA ,c. UK ,d. Other European Union (EU) country ,g. Other developed	a. Clinical	a. Individually randomized trial (Skip Q12)	1. Yes, one primary	3. No - There are no PROs	3. NA - trial does not have multiple co-primary outcomes		7. NA - PROs not primary	7. NA - PROs not secondary	6. NA - trial does not have PROs as primary outcome(s)	2. No	2. No	1. Yes, for (co)primary	10. Target difference not justified	N/A or unclear	4. NA		1. Yes	1. Industry	Superiority	Frequentist
5984	2017	Lancet	59.102	No	No	Prevention	Quaternary ammonium, Other; Bleach, Other; Quaternary ammonium and UV-C light, Other; Bleach and UV-C light, Other	b. USA	a. Clinical	b. Cluster randomized trial	2. Yes, two co-primaries	3. No - There are no PROs	2. No		7. NA - PROs not primary	7. NA - PROs not secondary	6. NA - trial does not have PROs as primary outcome(s)	2. No	1. Yes	1. Yes, for (co)primary	10. Target difference not justified	realistic	4. NA		2. No	"2. Government, international agency, university"	Superiority	Frequentist
5795	2017	Journal of Substance Abuse Treatment	2.542	No	No	Treatment	SBIRT, Behavioral; Control Group, Behavioral	b. USA	b. Public health	a. Individually randomized trial (Skip Q12)	2. Yes, two co-primaries	1. Yes - PRO is primary or co-primary outcome	2. No		4. Health behaviours	1. HRQoL or QoL,4. Health behaviours,6. Other (specify)	4. No	2. No	2. No	1. Yes, for (co)primary	8. No target difference stated	N/A or unclear	4. NA	0.22	2. No	"2. Government, international agency, university"	Superiority	Frequentist
5784	2017	Canadian Journal of Anaesthesia	3.374	No	No	Prevention	Nabilone, Drug; Placebo, Drug	a. Canada	a. Clinical	a. Individually randomized trial (Skip Q12)	1. Yes, one primary	2. Yes - PRO is secondary (not primary outcome)	3. NA - trial does not have multiple co-primary outcomes	Yes	7. NA - PROs not primary	3. Symptoms/symptom burden	6. NA - trial does not have PROs as primary outcome(s)	2. No	2. No	1. Yes, for (co)primary	6. Evidence review	realistic	4. NA		1. Yes	"3. Foundation, special interest group"	Superiority	Frequentist
3900	2017	PLoS ONE [Electronic Resource]	2.776	No	No	Treatment	moxibustion, Device; Ibuprofen Sustained Release Capsules, Drug	g. Other developed	a. Clinical	a. Individually randomized trial (Skip Q12)	1. Yes, one primary	1. Yes - PRO is primary or co-primary outcome	3. NA - trial does not have multiple co-primary outcomes	Yes	3. Symptoms/symptom burden	3. Symptoms/symptom burden	4. No	2. No	2. No	1. Yes, for (co)primary	10. Target difference not justified	N/A or unclear	4. NA		1. Yes	"2. Government, international agency, university"	Superiority	Frequentist
3664	2016	BMJ Open	2.376	No	No	Health Services Research	Diabetes Medication Choice decision aid, Other	d. Other European Union (EU) country	a. Clinical	b. Cluster randomized trial	1. Yes, one primary	1. Yes - PRO is primary or co-primary outcome	3. NA - trial does not have multiple co-primary outcomes		5. Patient experience	6. Other (specify),4. Health behaviours,5. Patient experience	4. No	2. No	2. No	1. Yes, for (co)primary	7. Pilot study or realistic difference	realistic	4. NA	0.58	1. Yes	1. Industry,"3. Foundation, special interest group"	Superiority	Frequentist
5809	2017	Archives of Physical Medicine & Rehabilitation	2.697	No	Yes	Prevention	physical therapy, Other	g. Other developed	a. Clinical	a. Individually randomized trial (Skip Q12)	1. Yes, one primary	1. Yes - PRO is primary or co-primary outcome	3. NA - trial does not have multiple co-primary outcomes	Yes	6. Other (specify)	6. Other (specify)	4. No	2. No	2. No	1. Yes, for (co)primary	10. Target difference not justified	important	4. NA		2. No	"2. Government, international agency, university"	Superiority	Frequentist
6045	2017	International Journal of Nursing Studies	3.57	No	Yes	Treatment	Cetaphil® Restoraderm, Other; Excipial, Other	d. Other European Union (EU) country	a. Clinical	b. Cluster randomized trial	1. Yes, one primary	3. No - There are no PROs	3. NA - trial does not have multiple co-primary outcomes		7. NA - PROs not primary	7. NA - PROs not secondary	6. NA - trial does not have PROs as primary outcome(s)	2. No	2. No	1. Yes, for (co)primary	9. Calculated the detectable difference given sample size	realistic	4. NA		2. No	1. Industry,"2. Government, international agency, university"	Superiority	Frequentist
5906	2017	The Lancet Respiratory Medicine	22.992	No	No	Treatment	oxygen and saline, Drug	d. Other European Union (EU) country	a. Clinical	a. Individually randomized trial (Skip Q12)	1. Yes, one primary	3. No - There are no PROs	3. NA - trial does not have multiple co-primary outcomes		7. NA - PROs not primary	7. NA - PROs not secondary	6. NA - trial does not have PROs as primary outcome(s)	2. No	2. No	1. Yes, for (co)primary	6. Evidence review,7. Pilot study or realistic difference	both	4. NA		2. No	1. Industry	Superiority	Frequentist
6060	2017	Journal of Consulting & Clinical Psychology	4.358	No	No	Treatment	Computerized self-help program for depression, Behavioral	b. USA	a. Clinical	a. Individually randomized trial (Skip Q12)	1. Yes, one primary	1. Yes - PRO is primary or co-primary outcome	3. NA - trial does not have multiple co-primary outcomes		3. Symptoms/symptom burden	3. Symptoms/symptom burden,2. Functional status	4. No	2. No	2. No	3. No	13. No SS calc	N/A or unclear	4. NA		4. NA - no sample size calculation	"3. Foundation, special interest group",1. Industry	Superiority	Frequentist
5831	2017	Addiction	6.851	No	No	Prevention	ASSIST-linked brief intervention for hazardous and harmful substance use., Other; Observation, Other	g. Other developed	a. Clinical	a. Individually randomized trial (Skip Q12)	1. Yes, one primary	1. Yes - PRO is primary or co-primary outcome	3. NA - trial does not have multiple co-primary outcomes		4. Health behaviours	4. Health behaviours	4. No	2. No	2. No	1. Yes, for (co)primary	7. Pilot study or realistic difference	realistic	4. NA	0.26	2. No	5. Not specified	Superiority	Frequentist
5978	2017	BMC Medicine	8.285	No	No	Supportive Care	Weight Wise Community Modules, Behavioral	a. Canada	a. Clinical	a. Individually randomized trial (Skip Q12)	1. Yes, one primary	2. Yes - PRO is secondary (not primary outcome)	3. NA - trial does not have multiple co-primary outcomes		7. NA - PROs not primary	5. Patient experience,1. HRQoL or QoL,6. Other (specify),3. Symptoms/symptom burden	6. NA - trial does not have PROs as primary outcome(s)	2. No	2. No	1. Yes, for (co)primary	7. Pilot study or realistic difference	realistic	4. NA		1. Yes	"2. Government, international agency, university"	Superiority	Frequentist
6574	2017	The Lancet Infectious Diseases	27.516	No	No	Supportive Care	Treatment as usual, Behavioral; AIMS intervention, Behavioral	d. Other European Union (EU) country	a. Clinical	a. Individually randomized trial (Skip Q12)	1. Yes, one primary	3. No - There are no PROs	3. NA - trial does not have multiple co-primary outcomes		7. NA - PROs not primary	7. NA - PROs not secondary	6. NA - trial does not have PROs as primary outcome(s)	2. No	2. No	1. Yes, for (co)primary	8. No target difference stated	N/A or unclear	4. NA		1. Yes	"2. Government, international agency, university",1. Industry	Superiority	Frequentist
5718	2017	Journal of Hospital Medicine (Online)	2.276	No	No	Health Services Research	Standardized attending morning rounds, Other	b. USA	a. Clinical	b. Cluster randomized trial	1. Yes, one primary	1. Yes - PRO is primary or co-primary outcome	3. NA - trial does not have multiple co-primary outcomes		5. Patient experience	7. NA - PROs not secondary	4. No	2. No	2. No	1. Yes, for (co)primary	9. Calculated the detectable difference given sample size	realistic	4. NA		2. No	5. Not specified	Superiority	Frequentist
6525	2017	Annals of Family Medicine	4.185	No	No		Brief Intervention, Behavioral	d. Other European Union (EU) country	a. Clinical	b. Cluster randomized trial	1. Yes, one primary	1. Yes - PRO is primary or co-primary outcome	3. NA - trial does not have multiple co-primary outcomes		4. Health behaviours	4. Health behaviours	4. No	2. No	2. No	1. Yes, for (co)primary	10. Target difference not justified	N/A or unclear	4. NA		1. Yes	"2. Government, international agency, university"	Superiority	Frequentist
6616	2017	Journal of the American Geriatrics Society	4.113	No	Yes	Treatment	Donepezil, Drug; Galantamine, Drug; Rivastigmine, Drug	b. USA	a. Clinical	a. Individually randomized trial (Skip Q12)	1. Yes, one primary	1. Yes - PRO is primary or co-primary outcome	3. NA - trial does not have multiple co-primary outcomes		4. Health behaviours	6. Other (specify)	4. No	2. No	2. No	1. Yes, for (co)primary	6. Evidence review	realistic	4. NA		2. No	"2. Government, international agency, university"	Superiority	Frequentist
4572	2017	PLoS ONE [Electronic Resource]	2.776	No	No	Prevention	Injury Prevention Briefing Plus facilitation, Behavioral; Injury Prevention Briefing, Behavioral	c. UK	b. Public health	b. Cluster randomized trial	1. Yes, one primary	1. Yes - PRO is primary or co-primary outcome	3. NA - trial does not have multiple co-primary outcomes		4. Health behaviours	4. Health behaviours,5. Patient experience	4. No	2. No	2. No	1. Yes, for (co)primary	10. Target difference not justified	N/A or unclear	4. NA		1. Yes	"2. Government, international agency, university"	Superiority	Frequentist
3714	2017	BMJ Open	2.376	No	No	Treatment	Open reduction internal fixation of the ankle, Procedure; Non Operative, Procedure	e. Australia or New Zealand	a. Clinical	a. Individually randomized trial (Skip Q12)	2. Yes, two co-primaries	1. Yes - PRO is primary or co-primary outcome	2. No		3. Symptoms/symptom burden,1. HRQoL or QoL	1. HRQoL or QoL,2. Functional status,3. Symptoms/symptom burden	1. Yes, lit citation or explanation	1. Yes	1. Yes	1. Yes, for (co)primary	5. Stakeholder/patient opinion,4. Standardized effect size	both	4. NA	0.5	1. Yes	"3. Foundation, special interest group"	Superiority	Frequentist
5797	2017	The Journal of Allergy & Clinical Immunology in Practice	7.55	No	No	Treatment	Fluticasone 250/formoterol 10, Drug; Fluticasone 250/salmeterol 25, Drug; Fluticasone 125/formoterol 5, Drug	c. UK	a. Clinical	a. Individually randomized trial (Skip Q12)	1. Yes, one primary	1. Yes - PRO is primary or co-primary outcome	3. NA - trial does not have multiple co-primary outcomes	Yes	3. Symptoms/symptom burden	1. HRQoL or QoL,3. Symptoms/symptom burden	4. No	2. No	2. No	1. Yes, for (co)primary	10. Target difference not justified	N/A or unclear	4. NA		1. Yes	1. Industry	Non-inferiority	Frequentist
5673	2017	BMC Medicine	8.285	No	No	Treatment	short treatment (ciprofloxacin), Drug	d. Other European Union (EU) country	a. Clinical	a. Individually randomized trial (Skip Q12)	1. Yes, one primary	3. No - There are no PROs	3. NA - trial does not have multiple co-primary outcomes		7. NA - PROs not primary	7. NA - PROs not secondary	6. NA - trial does not have PROs as primary outcome(s)	2. No	2. No	1. Yes, for (co)primary	7. Pilot study or realistic difference	realistic	4. NA		2. No	"3. Foundation, special interest group"	Non-inferiority	Frequentist
6306	2017	Psychological Medicine	5.641	No	No	Treatment	Routine Care, Other; Mindfulness-based program, Behavioral; Psychoeducation group, Behavioral	g. Other developed	a. Clinical	a. Individually randomized trial (Skip Q12)	2. Yes, two co-primaries	1. Yes - PRO is primary or co-primary outcome	1. Yes	Yes	2. Functional status	2. Functional status,6. Other (specify)	4. No	2. No	2. No	1. Yes, for (co)primary	7. Pilot study or realistic difference	realistic	3. Both		1. Yes	"2. Government, international agency, university"	Superiority	Frequentist
4143	2017	JAMA Internal Medicine	20.768	No	No	Health Services Research	Displaying medicare fee data, Other	b. USA	a. Clinical	b. Cluster randomized trial	1. Yes, one primary	3. No - There are no PROs	3. NA - trial does not have multiple co-primary outcomes		7. NA - PROs not primary	7. NA - PROs not secondary	6. NA - trial does not have PROs as primary outcome(s)	2. No	2. No	3. No	13. No SS calc	N/A or unclear	4. NA		4. NA - no sample size calculation	"2. Government, international agency, university"	Superiority	Frequentist
6576	2017	Annals of Internal Medicine	19.315	No	No	Diagnostic	usual care, Other; use of HEART risk score, Other	d. Other European Union (EU) country	a. Clinical	b. Cluster randomized trial	1. Yes, one primary	2. Yes - PRO is secondary (not primary outcome)	3. NA - trial does not have multiple co-primary outcomes		7. NA - PROs not primary	1. HRQoL or QoL,6. Other (specify)	6. NA - trial does not have PROs as primary outcome(s)	2. No	2. No	1. Yes, for (co)primary	7. Pilot study or realistic difference	realistic	4. NA		2. No	"2. Government, international agency, university"	Non-inferiority	Frequentist
6340	2017	International Journal of Nursing Studies	3.57	No	No	Treatment	Group treatment for insomnia, Behavioral	d. Other European Union (EU) country	a. Clinical	a. Individually randomized trial (Skip Q12)	1. Yes, one primary	1. Yes - PRO is primary or co-primary outcome	3. NA - trial does not have multiple co-primary outcomes		3. Symptoms/symptom burden	3. Symptoms/symptom burden,4. Health behaviours	1. Yes, lit citation or explanation	2. No	2. No	1. Yes, for (co)primary	1. Anchor,7. Pilot study or realistic difference	both	4. NA	0.97	1. Yes	"2. Government, international agency, university"	Superiority	Frequentist
4153	2017	JAMA Internal Medicine	20.768	No	No	Supportive Care	CARIÑO Project, Behavioral; Enhanced Usual Care, Behavioral	b. USA	a. Clinical	a. Individually randomized trial (Skip Q12)	2. Yes, two co-primaries	2. Yes - PRO is secondary (not primary outcome)	2. No		7. NA - PROs not primary	4. Health behaviours	6. NA - trial does not have PROs as primary outcome(s)	2. No	2. No	1. Yes, for (co)primary	10. Target difference not justified	N/A or unclear	4. NA		1. Yes	"2. Government, international agency, university"	Superiority	Frequentist
6155	2017	International Journal of Nursing Studies	3.57	No	No	Prevention	CBPM-system, Device; Control, Other	d. Other European Union (EU) country	a. Clinical	a. Individually randomized trial (Skip Q12)	2. Yes, two co-primaries	2. Yes - PRO is secondary (not primary outcome)	2. No		7. NA - PROs not primary	3. Symptoms/symptom burden	6. NA - trial does not have PROs as primary outcome(s)	2. No	2. No	1. Yes, for (co)primary	5. Stakeholder/patient opinion	important	4. NA		2. No	"2. Government, international agency, university","3. Foundation, special interest group"	Superiority	Frequentist
7909	2017	Chiropractic & manual therapies	0.57	No	No	Treatment	Manual Therapy Utrecht, Other; Physical Therapy, Other	d. Other European Union (EU) country	a. Clinical	a. Individually randomized trial (Skip Q12)	2. Yes, two co-primaries	1. Yes - PRO is primary or co-primary outcome	2. No		3. Symptoms/symptom burden,2. Functional status	3. Symptoms/symptom burden,2. Functional status	4. No	2. No	1. Yes	1. Yes, for (co)primary	7. Pilot study or realistic difference	realistic	4. NA		2. No	"2. Government, international agency, university"	Superiority	Frequentist
6108	2017	Intensive Care Medicine	18.967	No	No	Other	Change Management, Behavioral	d. Other European Union (EU) country	a. Clinical	b. Cluster randomized trial	1. Yes, one primary	3. No - There are no PROs	3. NA - trial does not have multiple co-primary outcomes		7. NA - PROs not primary	7. NA - PROs not secondary	6. NA - trial does not have PROs as primary outcome(s)	2. No	2. No	1. Yes, for (co)primary	7. Pilot study or realistic difference	realistic	4. NA		2. No	"2. Government, international agency, university"	Superiority	Frequentist
5714	2017	Journal of Acquired Immune Deficiency Syndromes: JAIDS	3.863	No	No	Health Services Research	Point of care CD4 testing, Other; Care Facilitation, Behavioral; Transport support, Other	g. Other developed	a. Clinical	a. Individually randomized trial (Skip Q12)	1. Yes, one primary	3. No - There are no PROs	3. NA - trial does not have multiple co-primary outcomes		7. NA - PROs not primary	7. NA - PROs not secondary	6. NA - trial does not have PROs as primary outcome(s)	2. No	2. No	1. Yes, for (co)primary	11. Authors state difference is important	important	4. NA		1. Yes	"2. Government, international agency, university"	Superiority	Frequentist
6171	2017	European Urology	17.298	No	No	Treatment	Retzius sparing radical prostatectomy, Procedure; Vattikuti Urology Institute radical prostatectomy, Procedure; da Vinci Surgical System, Device	b. USA	a. Clinical	a. Individually randomized trial (Skip Q12)	1. Yes, one primary	1. Yes - PRO is primary or co-primary outcome	3. NA - trial does not have multiple co-primary outcomes	Yes	3. Symptoms/symptom burden	3. Symptoms/symptom burden	4. No	2. No	3. Unclear or other (specify)	1. Yes, for (co)primary	7. Pilot study or realistic difference	realistic	4. NA		1. Yes	6. No funding	Superiority	Frequentist
3699	2017	BMJ Open	2.376	No	No	Treatment	Telemedicine, Device	d. Other European Union (EU) country	a. Clinical	b. Cluster randomized trial	1. Yes, one primary	1. Yes - PRO is primary or co-primary outcome	3. NA - trial does not have multiple co-primary outcomes	Yes	1. HRQoL or QoL	7. NA - PROs not secondary	4. No	2. No	3. Unclear or other (specify)	1. Yes, for (co)primary	10. Target difference not justified	N/A or unclear	4. NA		1. Yes	"2. Government, international agency, university"	Superiority	Frequentist
5859	2017	Arthritis & Rheumatology	9.002	No	No	Other	Learning Collaborative, Behavioral	b. USA	a. Clinical	b. Cluster randomized trial	1. Yes, one primary	3. No - There are no PROs	3. NA - trial does not have multiple co-primary outcomes		7. NA - PROs not primary	7. NA - PROs not secondary	6. NA - trial does not have PROs as primary outcome(s)	2. No	2. No	1. Yes, for (co)primary	7. Pilot study or realistic difference	realistic	4. NA		2. No	"2. Government, international agency, university"	Superiority	Frequentist
8274	2016	Translational Journal of the American College of Sports Medicine		No	No	Prevention	Nutritional counseling, Behavioral; Walking program, Behavioral; Nutritional counseling, Behavioral; Walking program, Behavioral; Simple pedometer, Device; Nutritional counseling, Behavioral; Walking program, Behavioral; Simple pedometer, Device; Enhanced pedometer, Device	b. USA	a. Clinical	a. Individually randomized trial (Skip Q12)	1. Yes, one primary	2. Yes - PRO is secondary (not primary outcome)	3. NA - trial does not have multiple co-primary outcomes		7. NA - PROs not primary	1. HRQoL or QoL,2. Functional status,4. Health behaviours,5. Patient experience	6. NA - trial does not have PROs as primary outcome(s)	2. No	2. No	1. Yes, for (co)primary	10. Target difference not justified	N/A or unclear	4. NA		1. Yes	"2. Government, international agency, university","3. Foundation, special interest group"	Superiority	Frequentist
6046	2017	Health Expectations	2.847	No	No	Treatment	Shared decision making, Behavioral	d. Other European Union (EU) country	a. Clinical	b. Cluster randomized trial	1. Yes, one primary	3. No - There are no PROs	3. NA - trial does not have multiple co-primary outcomes		7. NA - PROs not primary	7. NA - PROs not secondary	6. NA - trial does not have PROs as primary outcome(s)	1. Yes	2. No	1. Yes, for (co)primary	7. Pilot study or realistic difference	realistic	4. NA		1. Yes	"2. Government, international agency, university"	Superiority	Frequentist
6008	2017	Spine Journal: Official Journal of the North American Spine Society	3.196	No	No	Prevention	Silver Alloy-Coated Urinary Catheters, Device; Conventional Urinary Catheter, Device	g. Other developed	a. Clinical	a. Individually randomized trial (Skip Q12)	1. Yes, one primary	3. No - There are no PROs	3. NA - trial does not have multiple co-primary outcomes		7. NA - PROs not primary	7. NA - PROs not secondary	6. NA - trial does not have PROs as primary outcome(s)	2. No	2. No	1. Yes, for (co)primary	10. Target difference not justified	N/A or unclear	4. NA		1. Yes	"2. Government, international agency, university","3. Foundation, special interest group"	Superiority	Frequentist
5798	2017	American Journal of Obstetrics & Gynecology	6.12	No	No	Treatment	Chlorhexidine - Isopropyl alcohol, Drug; Povidone-Iodine Scrub and Paint, Drug	b. USA	a. Clinical	a. Individually randomized trial (Skip Q12)	1. Yes, one primary	3. No - There are no PROs	3. NA - trial does not have multiple co-primary outcomes		7. NA - PROs not primary	7. NA - PROs not secondary	6. NA - trial does not have PROs as primary outcome(s)	2. No	2. No	1. Yes, for (co)primary	11. Authors state difference is important	important	4. NA		2. No	5. Not specified	Superiority	Frequentist
6625	2017	Lancet Oncology	35.386	No	No	Treatment	pegfilgrastim, Biological; capecitabine, Drug; cyclophosphamide, Drug; epirubicin hydrochloride, Drug; fluorouracil, Drug; methotrexate, Drug; adjuvant therapy, Procedure	c. UK	a. Clinical	a. Individually randomized trial (Skip Q12)	1. Yes, one primary	2. Yes - PRO is secondary (not primary outcome)	3. NA - trial does not have multiple co-primary outcomes		7. NA - PROs not primary	1. HRQoL or QoL	6. NA - trial does not have PROs as primary outcome(s)	2. No	2. No	1. Yes, for (co)primary	10. Target difference not justified	N/A or unclear	4. NA		2. No	1. Industry,"3. Foundation, special interest group"	Superiority	Frequentist
4522	2017	JAMA Internal Medicine	20.768	No	No	Treatment	SMBG, Behavioral	b. USA	a. Clinical	a. Individually randomized trial (Skip Q12)	2. Yes, two co-primaries	1. Yes - PRO is primary or co-primary outcome	1. Yes	Yes	1. HRQoL or QoL	1. HRQoL or QoL,3. Symptoms/symptom burden,5. Patient experience,6. Other (specify)	4. No	2. No	1. Yes	1. Yes, for (co)primary	10. Target difference not justified	N/A or unclear	2. Clinical outcome		2. No	"2. Government, international agency, university"	Superiority	Frequentist
6469	2017	Annals of Emergency Medicine	5.209	No	No	Treatment	Patient controlled analgesia (PCA), Device; Usual Care, Other	b. USA	a. Clinical	a. Individually randomized trial (Skip Q12)	1. Yes, one primary	1. Yes - PRO is primary or co-primary outcome	3. NA - trial does not have multiple co-primary outcomes	Yes	3. Symptoms/symptom burden	5. Patient experience	4. No	2. No	2. No	1. Yes, for (co)primary	1. Anchor	important	4. NA		2. No	"2. Government, international agency, university"	Superiority	Frequentist
6334	2017	Bulletin of the World Health Organization	6.818	Yes	No	Health Services Research	Quality Improvement intervention, Other	f. Low or Middle Income Country (LMIC)	a. Clinical	b. Cluster randomized trial	1. Yes, one primary	3. No - There are no PROs	2. No		7. NA - PROs not primary	7. NA - PROs not secondary	6. NA - trial does not have PROs as primary outcome(s)	2. No	2. No	1. Yes, for (co)primary	10. Target difference not justified	N/A or unclear	4. NA		2. No	"2. Government, international agency, university"	Superiority	Frequentist
6575	2017	Global Health Science & Practice	2.35	Yes	No	Health Services Research	Community Based, Other	f. Low or Middle Income Country (LMIC)	a. Clinical	b. Cluster randomized trial	1. Yes, one primary	1. Yes - PRO is primary or co-primary outcome	3. NA - trial does not have multiple co-primary outcomes	Yes	6. Other (specify)	7. NA - PROs not secondary	4. No	1. Yes	1. Yes	1. Yes, for (co)primary	10. Target difference not justified	N/A or unclear	4. NA		2. No	"2. Government, international agency, university"	Superiority	Frequentist
8606	2017	JMIR Medical Informatics	3.188	No	No	Prevention	STOPP Criteria Decision Support Content, Other	a. Canada	a. Clinical	b. Cluster randomized trial	1. Yes, one primary	3. No - There are no PROs	3. NA - trial does not have multiple co-primary outcomes		7. NA - PROs not primary	7. NA - PROs not secondary	6. NA - trial does not have PROs as primary outcome(s)	2. No	1. Yes	1. Yes, for (co)primary	10. Target difference not justified	N/A or unclear	4. NA		1. Yes	"2. Government, international agency, university"	Superiority	Frequentist
5647	2017	Addiction	6.851	No	No	Health Services Research	Smoking reduction intervention, Behavioral; Exercise and diet advice control, Behavioral	f. Low or Middle Income Country (LMIC)	a. Clinical	a. Individually randomized trial (Skip Q12)	1. Yes, one primary	1. Yes - PRO is primary or co-primary outcome	3. NA - trial does not have multiple co-primary outcomes		4. Health behaviours	4. Health behaviours	4. No	2. No	2. No	1. Yes, for (co)primary	7. Pilot study or realistic difference	realistic	4. NA	10% difference in abstinence (15% of intervention group would quit)	1. Yes	"2. Government, international agency, university"	Superiority	Frequentist
6393	2017	Journal of General Internal Medicine	4.606	No	No	Treatment	ACCESS, Behavioral	b. USA	a. Clinical	a. Individually randomized trial (Skip Q12)	2. Yes, two co-primaries	1. Yes - PRO is primary or co-primary outcome	2. No		3. Symptoms/symptom burden	1. HRQoL or QoL,2. Functional status	4. No	2. No	2. No	1. Yes, for (co)primary	8. No target difference stated	N/A or unclear	4. NA		1. Yes	"2. Government, international agency, university"	Superiority	Frequentist
6497	2017	New England Journal of Medicine	70.67	No	No	Treatment	The lying flat (0°) head position for 24 hours, Other; The sitting-up (≥30°) head position for 24 hours, Other	e. Australia or New Zealand,g. Other developed,f. Low or Middle Income Country (LMIC) ,c. UK	a. Clinical	b. Cluster randomized trial	1. Yes, one primary	2. Yes - PRO is secondary (not primary outcome)	3. NA - trial does not have multiple co-primary outcomes		7. NA - PROs not primary	1. HRQoL or QoL	6. NA - trial does not have PROs as primary outcome(s)	2. No	2. No	1. Yes, for (co)primary	7. Pilot study or realistic difference	realistic	4. NA		1. Yes	"2. Government, international agency, university"	Superiority	Frequentist
5723	2017	Journal of the American Academy of Child & Adolescent Psychiatry	6.391	Yes	No	Treatment	Social skills group training, KONTAKT, Behavioral	d. Other European Union (EU) country	a. Clinical	a. Individually randomized trial (Skip Q12)	1. Yes, one primary	1. Yes - PRO is primary or co-primary outcome	3. NA - trial does not have multiple co-primary outcomes		2. Functional status	2. Functional status,3. Symptoms/symptom burden,6. Other (specify)	4. No	2. No	2. No	1. Yes, for (co)primary	7. Pilot study or realistic difference	realistic	4. NA		1. Yes	"2. Government, international agency, university","3. Foundation, special interest group"	Superiority	Frequentist
4125	2017	JAMA Internal Medicine	20.768	No	No	Health Services Research	Electronic Pill Bottle, Incentives, Social Influence, Behavioral	b. USA	a. Clinical	a. Individually randomized trial (Skip Q12)	1. Yes, one primary	3. No - There are no PROs	3. NA - trial does not have multiple co-primary outcomes		7. NA - PROs not primary	7. NA - PROs not secondary	6. NA - trial does not have PROs as primary outcome(s)	2. No	2. No	1. Yes, for (co)primary	7. Pilot study or realistic difference	realistic	4. NA		2. No	"2. Government, international agency, university"	Superiority	Frequentist
6114	2017	Thorax	9.64	No	No	Other	Enhanced education, Other; Usual education, Other; Usual follow up, Other; Enhanced follow up, Other	b. USA	a. Clinical	a. Individually randomized trial (Skip Q12)	1. Yes, one primary	3. No - There are no PROs	3. NA - trial does not have multiple co-primary outcomes		7. NA - PROs not primary	7. NA - PROs not secondary	6. NA - trial does not have PROs as primary outcome(s)	2. No	2. No	1. Yes, for (co)primary	6. Evidence review	realistic	4. NA		2. No	"2. Government, international agency, university"	Superiority	Frequentist
5756	2017	Anesthesia & Analgesia	3.489	No	No	Treatment	0.9% Normal Saline, Drug; Ringer's Lactate, Drug	f. Low or Middle Income Country (LMIC)	a. Clinical	a. Individually randomized trial (Skip Q12)	1. Yes, one primary	2. Yes - PRO is secondary (not primary outcome)	3. NA - trial does not have multiple co-primary outcomes		7. NA - PROs not primary	3. Symptoms/symptom burden	6. NA - trial does not have PROs as primary outcome(s)	2. No	2. No	1. Yes, for (co)primary	10. Target difference not justified	N/A or unclear	4. NA		2. No	6. No funding	Superiority	Frequentist
5259	2017	BMC Geriatrics	2.818	No	Yes	Prevention	RENEW, Behavioral	b. USA	a. Clinical	a. Individually randomized trial (Skip Q12)	4. No or unclear	1. Yes - PRO is primary or co-primary outcome	1. Yes		6. Other (specify)	6. Other (specify)	4. No	2. No	2. No	3. No	13. No SS calc	N/A or unclear	4. NA		4. NA - no sample size calculation	"2. Government, international agency, university"	Superiority	Frequentist
3698	2017	Lancet	59.102	No	No	Health Services Research	myIBDcoach, Other; Standard care, Other	d. Other European Union (EU) country	a. Clinical	a. Individually randomized trial (Skip Q12)	2. Yes, two co-primaries	1. Yes - PRO is primary or co-primary outcome	1. Yes	Yes	5. Patient experience	1. HRQoL or QoL,5. Patient experience,6. Other (specify),4. Health behaviours	4. No	2. No	2. No	1. Yes, for (co)primary	10. Target difference not justified	N/A or unclear	3. Both		1. Yes	"2. Government, international agency, university"	Superiority	Frequentist
4773	2017	European Journal of Clinical Pharmacology	2.774	No	Yes	Treatment	Pharmacist-physician intervention to reduce high-risk medication use by elderly inpatients, Procedure	a. Canada	a. Clinical	a. Individually randomized trial (Skip Q12)	1. Yes, one primary	3. No - There are no PROs	3. NA - trial does not have multiple co-primary outcomes		7. NA - PROs not primary	7. NA - PROs not secondary	6. NA - trial does not have PROs as primary outcome(s)	2. No	2. No	1. Yes, for (co)primary	7. Pilot study or realistic difference	realistic	4. NA		2. No	1. Industry	Superiority	Frequentist
5216	2017	JAMA	51.273	Yes	No	Prevention	Vitamin D - Cholecalciferol 400 IU, Drug; Vitamin D3 - Cholecalciferol 2000 IU, Drug	a. Canada	a. Clinical	a. Individually randomized trial (Skip Q12)	1. Yes, one primary	2. Yes - PRO is secondary (not primary outcome)	3. NA - trial does not have multiple co-primary outcomes		7. NA - PROs not primary	3. Symptoms/symptom burden	6. NA - trial does not have PROs as primary outcome(s)	2. No	2. No	1. Yes, for (co)primary	4. Standardized effect size	important	4. NA		1. Yes	1. Industry,"3. Foundation, special interest group","2. Government, international agency, university"	Superiority	Frequentist
5402	2017	The Lancet Respiratory Medicine	22.992	No	Yes	Prevention	HD Vaccine, Biological; SD Vaccine, Biological; Free Vaccine, Biological; Usual Care, Biological	b. USA	a. Clinical	b. Cluster randomized trial	1. Yes, one primary	3. No - There are no PROs	3. NA - trial does not have multiple co-primary outcomes		7. NA - PROs not primary	7. NA - PROs not secondary	6. NA - trial does not have PROs as primary outcome(s)	2. No	2. No	1. Yes, for (co)primary	10. Target difference not justified	N/A or unclear	4. NA		2. No	1. Industry	Superiority	Frequentist
4702	2017	JAMA	51.273	No	No	Treatment	Therapeutic hypothermia, Other	h. Unclear	a. Clinical	a. Individually randomized trial (Skip Q12)	1. Yes, one primary	3. No - There are no PROs	3. NA - trial does not have multiple co-primary outcomes		7. NA - PROs not primary	7. NA - PROs not secondary	6. NA - trial does not have PROs as primary outcome(s)	2. No	2. No	1. Yes, for (co)primary	6. Evidence review	realistic	4. NA		1. Yes	"3. Foundation, special interest group"	Superiority	Frequentist
4083	2017	JAMA Psychiatry	15.916	No	Yes	Supportive Care	Implementation of Dementia Care Manager, Other	d. Other European Union (EU) country	a. Clinical	b. Cluster randomized trial	4. No or unclear	1. Yes - PRO is primary or co-primary outcome	2. No	Yes	1. HRQoL or QoL,3. Symptoms/symptom burden,4. Health behaviours,6. Other (specify)	2. Functional status,4. Health behaviours,6. Other (specify)	4. No	2. No	2. No	1. Yes, for (co)primary	4. Standardized effect size	N/A or unclear	4. NA		1. Yes	"2. Government, international agency, university"	Superiority	Frequentist
4853	2017	Clinical Journal of The American Society of Nephrology: CJASN	6.243	No	No	Prevention	Enhanced MyChart, Other; Patient Navigator, Other; MyChart, Other	b. USA	a. Clinical	a. Individually randomized trial (Skip Q12)	1. Yes, one primary	3. No - There are no PROs	3. NA - trial does not have multiple co-primary outcomes		7. NA - PROs not primary	7. NA - PROs not secondary	6. NA - trial does not have PROs as primary outcome(s)	2. No	2. No	1. Yes, for (co)primary	10. Target difference not justified	N/A or unclear	4. NA		2. No	"2. Government, international agency, university",1. Industry	Superiority	Frequentist
5246	2017	Pharmacoepidemiology & Drug Safety	2.87	Missing data	Missing data	Prevention	Educational intervention, Other	d. Other European Union (EU) country	a. Clinical	b. Cluster randomized trial	1. Yes, one primary	3. No - There are no PROs	3. NA - trial does not have multiple co-primary outcomes		7. NA - PROs not primary	7. NA - PROs not secondary	6. NA - trial does not have PROs as primary outcome(s)	2. No	1. Yes	1. Yes, for (co)primary	7. Pilot study or realistic difference	realistic	4. NA		2. No	"2. Government, international agency, university"	Superiority	Frequentist
5587	2017	Annals of Surgery	9.476	No	No	Supportive Care	Rehabilitation program, Other	d. Other European Union (EU) country	a. Clinical	a. Individually randomized trial (Skip Q12)	1. Yes, one primary	2. Yes - PRO is secondary (not primary outcome)	3. NA - trial does not have multiple co-primary outcomes		7. NA - PROs not primary	1. HRQoL or QoL	6. NA - trial does not have PROs as primary outcome(s)	2. No	2. No	1. Yes, for (co)primary	10. Target difference not justified	N/A or unclear	4. NA		2. No	"2. Government, international agency, university"	Superiority	Frequentist
5151	2017	Lancet	59.102	No	No	Prevention	Ultraviolet light-resistant plastic in-ground pesticide storage container, Device	g. Other developed	b. Public health	b. Cluster randomized trial	1. Yes, one primary	3. No - There are no PROs	3. NA - trial does not have multiple co-primary outcomes		7. NA - PROs not primary	7. NA - PROs not secondary	6. NA - trial does not have PROs as primary outcome(s)	2. No	2. No	1. Yes, for (co)primary	10. Target difference not justified	N/A or unclear	4. NA		2. No	"2. Government, international agency, university","3. Foundation, special interest group"	Superiority	Frequentist
4852	2017	Journal of Clinical Anesthesia	3.542	No	No		Call, Other	b. USA	a. Clinical	a. Individually randomized trial (Skip Q12)	1. Yes, one primary	3. No - There are no PROs	3. NA - trial does not have multiple co-primary outcomes		7. NA - PROs not primary	7. NA - PROs not secondary	6. NA - trial does not have PROs as primary outcome(s)	1. Yes	2. No	1. Yes, for (co)primary	10. Target difference not justified	N/A or unclear	4. NA		2. No	"2. Government, international agency, university"	Superiority	Bayesian
4896	2017	New England Journal of Medicine	70.67	No	No	Treatment	Oxygen, Drug	d. Other European Union (EU) country	a. Clinical	a. Individually randomized trial (Skip Q12)	1. Yes, one primary	3. No - There are no PROs	3. NA - trial does not have multiple co-primary outcomes		7. NA - PROs not primary	7. NA - PROs not secondary	6. NA - trial does not have PROs as primary outcome(s)	2. No	2. No	1. Yes, for (co)primary	10. Target difference not justified	important	4. NA		1. Yes	"2. Government, international agency, university"	Superiority	Frequentist
4993	2017	Trials [Electronic Resource]	1.975	No	No	Health Services Research	integrated client care group, Other	a. Canada	a. Clinical	b. Cluster randomized trial	1. Yes, one primary	3. No - There are no PROs	3. NA - trial does not have multiple co-primary outcomes		7. NA - PROs not primary	7. NA - PROs not secondary	6. NA - trial does not have PROs as primary outcome(s)	2. No	1. Yes	3. No	13. No SS calc	N/A or unclear	4. NA		4. NA - no sample size calculation	"2. Government, international agency, university"	Superiority	Frequentist
4738	2017	PLoS ONE [Electronic Resource]	2.776	No	No	Prevention	Community Health Worker intervention, Behavioral	f. Low or Middle Income Country (LMIC)	a. Clinical	b. Cluster randomized trial	1. Yes, one primary	3. No - There are no PROs	3. NA - trial does not have multiple co-primary outcomes		7. NA - PROs not primary	7. NA - PROs not secondary	6. NA - trial does not have PROs as primary outcome(s)	2. No	2. No	1. Yes, for (co)primary	7. Pilot study or realistic difference	realistic	4. NA		3. Unclear or other	"2. Government, international agency, university"	Superiority	Frequentist
5225	2017	JAMA	51.273	No	No	Screening	FIT Screening Strategy, Other; Colon Screening Strategy, Other	b. USA	b. Public health	a. Individually randomized trial (Skip Q12)	1. Yes, one primary	3. No - There are no PROs	3. NA - trial does not have multiple co-primary outcomes		7. NA - PROs not primary	7. NA - PROs not secondary	6. NA - trial does not have PROs as primary outcome(s)	2. No	2. No	1. Yes, for (co)primary	6. Evidence review	realistic	4. NA		2. No	1. Industry,"2. Government, international agency, university"	Superiority	Frequentist
5223	2017	PLoS ONE [Electronic Resource]	2.776	No	No	Health Services Research	Early intervention, Behavioral; Delayed intervention, Behavioral	f. Low or Middle Income Country (LMIC)	b. Public health	b. Cluster randomized trial	2. Yes, two co-primaries	3. No - There are no PROs	2. No		7. NA - PROs not primary	7. NA - PROs not secondary	6. NA - trial does not have PROs as primary outcome(s)	1. Yes	1. Yes	1. Yes, for (co)primary	10. Target difference not justified	N/A or unclear	4. NA		2. No	"3. Foundation, special interest group"	Superiority	Frequentist
4715	2017	PLoS ONE [Electronic Resource]	2.776	No	No	Treatment	A structured training program, Other	g. Other developed	a. Clinical	b. Cluster randomized trial	1. Yes, one primary	3. No - There are no PROs	3. NA - trial does not have multiple co-primary outcomes		7. NA - PROs not primary	7. NA - PROs not secondary	6. NA - trial does not have PROs as primary outcome(s)	2. No	1. Yes	1. Yes, for (co)primary	5. Stakeholder/patient opinion	important	4. NA		1. Yes	"2. Government, international agency, university"	Superiority	Frequentist
5108	2017	New England Journal of Medicine	70.67	No	No	Treatment	Exenatide Once Weekly, Drug; Placebo, Drug	h. Unclear	a. Clinical	a. Individually randomized trial (Skip Q12)	1. Yes, one primary	3. No - There are no PROs	3. NA - trial does not have multiple co-primary outcomes		7. NA - PROs not primary	7. NA - PROs not secondary	6. NA - trial does not have PROs as primary outcome(s)	2. No	2. No	1. Yes, for (co)primary	10. Target difference not justified	N/A or unclear	4. NA		2. No	1. Industry	Non-inferiority	Frequentist
5098	2017	The Lancet Diabetes & Endocrinology	24.54	No	No	Treatment	add-on pioglitazone, Drug; add-on sulphonylurea, Drug	d. Other European Union (EU) country	a. Clinical	a. Individually randomized trial (Skip Q12)	1. Yes, one primary	3. No - There are no PROs	3. NA - trial does not have multiple co-primary outcomes		7. NA - PROs not primary	7. NA - PROs not secondary	6. NA - trial does not have PROs as primary outcome(s)	2. No	2. No	1. Yes, for (co)primary	7. Pilot study or realistic difference	realistic	4. NA		1. Yes	1. Industry,"3. Foundation, special interest group"	Superiority	Frequentist
2133	2018	Chest	9.657	No	No	Prevention	Written Checklist, Procedure; Head of Bed Up, Procedure	b. USA	a. Clinical	a. Individually randomized trial (Skip Q12)	2. Yes, two co-primaries	3. No - There are no PROs	2. No		7. NA - PROs not primary	7. NA - PROs not secondary	6. NA - trial does not have PROs as primary outcome(s)	2. No	2. No	3. No	13. No SS calc	important	4. NA		1. Yes	"2. Government, international agency, university"	Superiority	Frequentist
8156	2018	Jacc: Cardiovascular Imaging	10.975	No	No	Diagnostic	mHealth, Device; Standard-Care, Other	f. Low or Middle Income Country (LMIC)	a. Clinical	a. Individually randomized trial (Skip Q12)	1. Yes, one primary	3. No - There are no PROs	3. NA - trial does not have multiple co-primary outcomes		7. NA - PROs not primary	7. NA - PROs not secondary	6. NA - trial does not have PROs as primary outcome(s)	2. No	2. No	3. No	13. No SS calc	N/A or unclear	4. NA		2. No	1. Industry,"3. Foundation, special interest group"	Superiority	Frequentist
5192	2017	JAMA	51.273	No	Yes		recommendations to admit to ICU all the patients included, Other	d. Other European Union (EU) country	a. Clinical	b. Cluster randomized trial	1. Yes, one primary	2. Yes - PRO is secondary (not primary outcome)	3. NA - trial does not have multiple co-primary outcomes		7. NA - PROs not primary	1. HRQoL or QoL,2. Functional status	6. NA - trial does not have PROs as primary outcome(s)	2. No	2. No	1. Yes, for (co)primary	7. Pilot study or realistic difference	realistic	4. NA		2. No	"2. Government, international agency, university"	Superiority	Frequentist
7939	2018	BMJ Quality & Safety	7.043	No	No	Health Services Research	Pharmacist obtains admission medication history, Other; Pharmacy technician obtains admission medication history, Other	b. USA	a. Clinical	a. Individually randomized trial (Skip Q12)	1. Yes, one primary	3. No - There are no PROs	3. NA - trial does not have multiple co-primary outcomes		7. NA - PROs not primary	7. NA - PROs not secondary	6. NA - trial does not have PROs as primary outcome(s)	2. No	2. No	1. Yes, for (co)primary	11. Authors state difference is important	important	4. NA		2. No	"2. Government, international agency, university"	Superiority	Frequentist
5283	2017	Annals of Internal Medicine	19.315	No	No	Supportive Care	Multidisciplinary medication review, Procedure	d. Other European Union (EU) country	a. Clinical	b. Cluster randomized trial	1. Yes, one primary	2. Yes - PRO is secondary (not primary outcome)	3. NA - trial does not have multiple co-primary outcomes		7. NA - PROs not primary	1. HRQoL or QoL	6. NA - trial does not have PROs as primary outcome(s)	2. No	2. No	1. Yes, for (co)primary	10. Target difference not justified	N/A or unclear	4. NA		2. No	"2. Government, international agency, university"	Superiority	Frequentist
3972	2017	JAMA Internal Medicine	20.768	No	No	Health Services Research	AWARD and brief leaflet/ Referral leaflet and active referral/ Smoking cessation booklet and general advices, Behavioral	g. Other developed	b. Public health	b. Cluster randomized trial	1. Yes, one primary	1. Yes - PRO is primary or co-primary outcome	3. NA - trial does not have multiple co-primary outcomes		4. Health behaviours	4. Health behaviours,6. Other (specify)	4. No	2. No	2. No	1. Yes, for (co)primary	7. Pilot study or realistic difference	realistic	4. NA		1. Yes	"2. Government, international agency, university"	Superiority	Frequentist
4951	2018	Ultrasound in Obstetrics & Gynecology	5.595	No	No	Treatment	misoprostol, Drug	d. Other European Union (EU) country	a. Clinical	a. Individually randomized trial (Skip Q12)	1. Yes, one primary	2. Yes - PRO is secondary (not primary outcome)	3. NA - trial does not have multiple co-primary outcomes		7. NA - PROs not primary	3. Symptoms/symptom burden,4. Health behaviours	6. NA - trial does not have PROs as primary outcome(s)	2. No	2. No	1. Yes, for (co)primary	6. Evidence review	realistic	4. NA		1. Yes	"2. Government, international agency, university"	Superiority	Frequentist
7708	2018	Annals of Emergency Medicine	5.209	No	No	Screening	Nurse-driven HIV targeted screening, Procedure; Current practice, Procedure	g. Other developed	a. Clinical	b. Cluster randomized trial	1. Yes, one primary	2. Yes - PRO is secondary (not primary outcome)	3. NA - trial does not have multiple co-primary outcomes		7. NA - PROs not primary	4. Health behaviours	6. NA - trial does not have PROs as primary outcome(s)	2. No	2. No	1. Yes, for (co)primary	7. Pilot study or realistic difference	realistic	4. NA		2. No	"2. Government, international agency, university","3. Foundation, special interest group"	Superiority	Frequentist
5538	2018	The Lancet Respiratory Medicine	22.992	No	No	Treatment	Qvar (100 mcg), Drug	c. UK ,g. Other developed	a. Clinical	a. Individually randomized trial (Skip Q12)	1. Yes, one primary	1. Yes - PRO is primary or co-primary outcome	3. NA - trial does not have multiple co-primary outcomes		3. Symptoms/symptom burden	3. Symptoms/symptom burden	4. No	2. No	2. No	1. Yes, for (co)primary	8. No target difference stated	N/A or unclear	4. NA		1. Yes	"2. Government, international agency, university",1. Industry	Superiority	Frequentist
4636	2017	Pediatrics	5.401	No	No	Prevention	Social Media plus information pages, Behavioral; Vaccine Information Pages, Behavioral	b. USA	a. Clinical	a. Individually randomized trial (Skip Q12)	1. Yes, one primary	3. No - There are no PROs	3. NA - trial does not have multiple co-primary outcomes		7. NA - PROs not primary	7. NA - PROs not secondary	6. NA - trial does not have PROs as primary outcome(s)	2. No	2. No	1. Yes, for (co)primary	10. Target difference not justified	important	4. NA		2. No	"2. Government, international agency, university"	Superiority	Frequentist
4917	2018	Radiotherapy & Oncology	5.252	No	No	Treatment	Intensive nutritional counseling, Dietary Supplement; Nutritional counseling, Other	d. Other European Union (EU) country	a. Clinical	a. Individually randomized trial (Skip Q12)	1. Yes, one primary	2. Yes - PRO is secondary (not primary outcome)	3. NA - trial does not have multiple co-primary outcomes		7. NA - PROs not primary	1. HRQoL or QoL	6. NA - trial does not have PROs as primary outcome(s)	2. No	2. No	1. Yes, for (co)primary	10. Target difference not justified	important	4. NA		2. No	1. Industry,"2. Government, international agency, university"	Superiority	Frequentist
5178	2017	PLoS Medicine / Public Library of Science	11.048	No	No	Treatment	POC (point-of-care) CD4+ (cluster of differentiation 4) Count, Procedure; Accelerated ART (antiretroviral therapy) Initiation, Procedure; Basic Care and Prevention Package, Behavioral; Cellular Appointment Reminders and Follow-Up, Behavioral; Financial Incentive, Other	f. Low or Middle Income Country (LMIC)	a. Clinical	b. Cluster randomized trial	1. Yes, one primary	2. Yes - PRO is secondary (not primary outcome)	3. NA - trial does not have multiple co-primary outcomes		7. NA - PROs not primary	6. Other (specify)	6. NA - trial does not have PROs as primary outcome(s)	2. No	2. No	1. Yes, for (co)primary	9. Calculated the detectable difference given sample size	N/A or unclear	4. NA		2. No	"2. Government, international agency, university","3. Foundation, special interest group"	Superiority	Frequentist
1887	2018	Canadian Journal of Anaesthesia	3.374	No	No	Treatment	Dexamethasone, Drug; Bupivacaine, Drug; Interscalene brachial plexus block, Procedure	a. Canada	a. Clinical	a. Individually randomized trial (Skip Q12)	1. Yes, one primary	1. Yes - PRO is primary or co-primary outcome	3. NA - trial does not have multiple co-primary outcomes		3. Symptoms/symptom burden	2. Functional status,3. Symptoms/symptom burden,5. Patient experience	4. No	2. No	2. No	1. Yes, for (co)primary	6. Evidence review	both	4. NA		1. Yes	"2. Government, international agency, university","3. Foundation, special interest group"	Superiority	Frequentist
5161	2018	American Journal of Obstetrics & Gynecology	6.12	No	No	Treatment	Self-care acupressure at three predefined points, Procedure	d. Other European Union (EU) country	a. Clinical	a. Individually randomized trial (Skip Q12)	1. Yes, one primary	1. Yes - PRO is primary or co-primary outcome	3. NA - trial does not have multiple co-primary outcomes		3. Symptoms/symptom burden	3. Symptoms/symptom burden,4. Health behaviours,6. Other (specify)	2. Yes, patient consultation	2. No	1. Yes	1. Yes, for (co)primary	4. Standardized effect size,6. Evidence review	realistic	4. NA		1. Yes	5. Not specified	Superiority	Frequentist
5213	2018	Gastrointestinal Endoscopy	7.229	No	No	Diagnostic	left lateral tilt-down position, Procedure; left lateral horizontal position, Procedure	g. Other developed	a. Clinical	a. Individually randomized trial (Skip Q12)	1. Yes, one primary	2. Yes - PRO is secondary (not primary outcome)	3. NA - trial does not have multiple co-primary outcomes		7. NA - PROs not primary	3. Symptoms/symptom burden	6. NA - trial does not have PROs as primary outcome(s)	2. No	2. No	1. Yes, for (co)primary	7. Pilot study or realistic difference	realistic	4. NA		2. No	"2. Government, international agency, university"	Superiority	Frequentist
5596	2018	Lancet	59.102	No	No	Treatment	Arthroscopic Sub-acromial Decompression Surgery, Procedure; Shoulder Arthroscopy, Procedure; Active Monitoring with Specialist Reassessment, Other	c. UK	a. Clinical	a. Individually randomized trial (Skip Q12)	1. Yes, one primary	1. Yes - PRO is primary or co-primary outcome	3. NA - trial does not have multiple co-primary outcomes		3. Symptoms/symptom burden	1. HRQoL or QoL,3. Symptoms/symptom burden,5. Patient experience,6. Other (specify)	4. No	2. No	2. No	1. Yes, for (co)primary	4. Standardized effect size	important	4. NA	0.5 the standard deviation (4.5 points)	1. Yes	"2. Government, international agency, university","3. Foundation, special interest group"	Superiority	Frequentist
4976	2017	BMJ	27.604	No	No	Treatment	Aspirin, Drug; Placebo, Drug	e. Australia or New Zealand	a. Clinical	a. Individually randomized trial (Skip Q12)	1. Yes, one primary	2. Yes - PRO is secondary (not primary outcome)	3. NA - trial does not have multiple co-primary outcomes		7. NA - PROs not primary	1. HRQoL or QoL	6. NA - trial does not have PROs as primary outcome(s)	1. Yes	2. No	1. Yes, for (co)primary	5. Stakeholder/patient opinion	both	4. NA		2. No	"2. Government, international agency, university"	Superiority	Frequentist
4705	2017	Intensive Care Medicine	18.967	No	No	Supportive Care	Administration of the IPREA3 questionnaire, Other; Immediate feedback through electronic reminder messages, Other; Targeted interventions in each ICU to reduce discomforts, Other	d. Other European Union (EU) country	a. Clinical	b. Cluster randomized trial	1. Yes, one primary	1. Yes - PRO is primary or co-primary outcome	3. NA - trial does not have multiple co-primary outcomes		3. Symptoms/symptom burden	3. Symptoms/symptom burden	4. No	2. No	1. Yes	1. Yes, for (co)primary	7. Pilot study or realistic difference	realistic	4. NA		1. Yes	"2. Government, international agency, university"	Superiority	Frequentist
8155	2017	Cd (Clinical Diabetes)	0.71	No	No	Supportive Care	Mindfulness Based Stress Reduction, Behavioral	a. Canada	a. Clinical	a. Individually randomized trial (Skip Q12)	1. Yes, one primary	1. Yes - PRO is primary or co-primary outcome	3. NA - trial does not have multiple co-primary outcomes		3. Symptoms/symptom burden	3. Symptoms/symptom burden,1. HRQoL or QoL,4. Health behaviours,2. Functional status	1. Yes, lit citation or explanation	2. No	2. No	1. Yes, for (co)primary	5. Stakeholder/patient opinion,2. Distribution	important	4. NA	30% difference in percentage of responders to intervention	2. No	"2. Government, international agency, university","3. Foundation, special interest group"	Superiority	Frequentist
7704	2018	Journal of the American Geriatrics Society	4.113	No	Yes	Prevention	ED Discharge & Medication Call, Behavioral; Placebo Comparator, Behavioral	b. USA	a. Clinical	a. Individually randomized trial (Skip Q12)	1. Yes, one primary	3. No - There are no PROs	3. NA - trial does not have multiple co-primary outcomes		7. NA - PROs not primary	7. NA - PROs not secondary	6. NA - trial does not have PROs as primary outcome(s)	2. No	2. No	1. Yes, for (co)primary	10. Target difference not justified	N/A or unclear	4. NA		1. Yes	"3. Foundation, special interest group",4. Other (specify)	Superiority	Frequentist
3260	2018	American Journal of Health Promotion	2.636	No	No	Prevention	Different levels of cost sharing, Behavioral	b. USA	b. Public health	a. Individually randomized trial (Skip Q12)	1. Yes, one primary	3. No - There are no PROs	3. NA - trial does not have multiple co-primary outcomes		7. NA - PROs not primary	7. NA - PROs not secondary	6. NA - trial does not have PROs as primary outcome(s)	2. No	2. No	1. Yes, for (co)primary	10. Target difference not justified	N/A or unclear	4. NA		2. No	1. Industry	Superiority	Frequentist
5093	2018	Stroke	6.046	No	No	Treatment	Long term follow up by a coordinating physiotherapist, Behavioral; Standard care, Behavioral	g. Other developed	a. Clinical	a. Individually randomized trial (Skip Q12)	1. Yes, one primary	2. Yes - PRO is secondary (not primary outcome)	3. NA - trial does not have multiple co-primary outcomes		7. NA - PROs not primary	4. Health behaviours,2. Functional status,3. Symptoms/symptom burden,1. HRQoL or QoL	6. NA - trial does not have PROs as primary outcome(s)	2. No	2. No	1. Yes, for (co)primary	7. Pilot study or realistic difference	realistic	4. NA		1. Yes	"2. Government, international agency, university"	Superiority	Frequentist
7806	2018	Osteoarthritis & Cartilage	4.879	No	No	Treatment	Internet Based Exercise Training, Behavioral; Physical Therapy, Behavioral	b. USA	a. Clinical	a. Individually randomized trial (Skip Q12)	1. Yes, one primary	1. Yes - PRO is primary or co-primary outcome	3. NA - trial does not have multiple co-primary outcomes		3. Symptoms/symptom burden	2. Functional status,3. Symptoms/symptom burden,4. Health behaviours	4. No	1. Yes	1. Yes	1. Yes, for (co)primary	10. Target difference not justified	N/A or unclear	4. NA		1. Yes	"2. Government, international agency, university"	Non-inferiority	Frequentist
5137	2018	International Wound Journal	2.385	No	Yes	Prevention	hydrocellular polyurethane foam multilayer dressing, Device; standard care, Procedure	d. Other European Union (EU) country	a. Clinical	a. Individually randomized trial (Skip Q12)	1. Yes, one primary	3. No - There are no PROs	3. NA - trial does not have multiple co-primary outcomes		7. NA - PROs not primary	7. NA - PROs not secondary	6. NA - trial does not have PROs as primary outcome(s)	2. No	2. No	1. Yes, for (co)primary	7. Pilot study or realistic difference	realistic	4. NA		1. Yes	1. Industry	Superiority	Frequentist
2960	2018	Implementation Science	4.525	No	No	Supportive Care	academic detailing intervention, Behavioral	d. Other European Union (EU) country	a. Clinical	b. Cluster randomized trial	2. Yes, two co-primaries	3. No - There are no PROs	2. No		7. NA - PROs not primary	7. NA - PROs not secondary	6. NA - trial does not have PROs as primary outcome(s)	2. No	2. No	1. Yes, for (co)primary	10. Target difference not justified	N/A or unclear	4. NA		2. No	"2. Government, international agency, university"	Superiority	Frequentist
5045	2018	Stroke	6.046	No	No		training of emergency professionals to acute stroke management, Other	d. Other European Union (EU) country	a. Clinical	b. Cluster randomized trial	1. Yes, one primary	3. No - There are no PROs	3. NA - trial does not have multiple co-primary outcomes		7. NA - PROs not primary	7. NA - PROs not secondary	6. NA - trial does not have PROs as primary outcome(s)	2. No	1. Yes	2. Yes, but not for (co)primary	10. Target difference not justified	N/A or unclear	4. NA		2. No	"2. Government, international agency, university"	Superiority	Frequentist
5232	2018	International Journal of Nursing Studies	3.57	No	No	Prevention	Optimal Turning, Other; Standard Care Practices, Other; Patient Sensor, Other	b. USA	a. Clinical	a. Individually randomized trial (Skip Q12)	1. Yes, one primary	3. No - There are no PROs	3. NA - trial does not have multiple co-primary outcomes		7. NA - PROs not primary	7. NA - PROs not secondary	6. NA - trial does not have PROs as primary outcome(s)	2. No	2. No	1. Yes, for (co)primary	10. Target difference not justified	N/A or unclear	4. NA		2. No	1. Industry	Superiority	Frequentist
8209	2018	Journals of Gerontology Series A-Biological Sciences & Medical Sciences	4.711	No	Yes	Prevention	Multifactorial intervention, Other	d. Other European Union (EU) country	a. Clinical	a. Individually randomized trial (Skip Q12)	4. No or unclear	3. No - There are no PROs	3. NA - trial does not have multiple co-primary outcomes		7. NA - PROs not primary	7. NA - PROs not secondary	6. NA - trial does not have PROs as primary outcome(s)	2. No	2. No	3. No	13. No SS calc	N/A or unclear	4. NA		4. NA - no sample size calculation	"2. Government, international agency, university"	Superiority	Frequentist
3541	2018	Pediatrics	5.401	Yes	No	Diagnostic	Clinical Decision Support (CDS), Behavioral	b. USA	a. Clinical	b. Cluster randomized trial	1. Yes, one primary	3. No - There are no PROs	3. NA - trial does not have multiple co-primary outcomes		7. NA - PROs not primary	7. NA - PROs not secondary	6. NA - trial does not have PROs as primary outcome(s)	2. No	2. No	1. Yes, for (co)primary	10. Target difference not justified	N/A or unclear	4. NA		2. No	"2. Government, international agency, university"	Superiority	Frequentist
4725	2018	International Journal of Biometeorology	2.377	No	No	Treatment	immediate spa therapy, Other	d. Other European Union (EU) country	a. Clinical	a. Individually randomized trial (Skip Q12)	1. Yes, one primary	1. Yes - PRO is primary or co-primary outcome	3. NA - trial does not have multiple co-primary outcomes	Yes	3. Symptoms/symptom burden	1. HRQoL or QoL,3. Symptoms/symptom burden,4. Health behaviours	4. No	2. No	2. No	1. Yes, for (co)primary	6. Evidence review	realistic	4. NA		1. Yes	5. Not specified	Superiority	Frequentist
5028	2018	Patient Education & Counseling	2.821	Yes	No	Treatment	Educational Video and Question Prompt List, Behavioral	b. USA	a. Clinical	a. Individually randomized trial (Skip Q12)	4. No or unclear	3. No - There are no PROs	3. NA - trial does not have multiple co-primary outcomes		7. NA - PROs not primary	7. NA - PROs not secondary	6. NA - trial does not have PROs as primary outcome(s)	2. No	2. No	1. Yes, for (co)primary	7. Pilot study or realistic difference	realistic	4. NA		2. No	"2. Government, international agency, university"	Superiority	Frequentist
2052	2018	BMC Family Practice	2.431	No	No	Treatment	care manager for depression, Other	d. Other European Union (EU) country	a. Clinical	b. Cluster randomized trial	1. Yes, one primary	1. Yes - PRO is primary or co-primary outcome	3. NA - trial does not have multiple co-primary outcomes		3. Symptoms/symptom burden	1. HRQoL or QoL,5. Patient experience,4. Health behaviours,6. Other (specify)	4. No	2. No	1. Yes	1. Yes, for (co)primary	10. Target difference not justified	N/A or unclear	4. NA	0.3	2. No	"2. Government, international agency, university"	Superiority	Frequentist
5235	2018	JAMA	51.273	No	No	Health Services Research	Quality Improvement Toolkit, Behavioral	f. Low or Middle Income Country (LMIC)	a. Clinical	b. Cluster randomized trial	1. Yes, one primary	3. No - There are no PROs	3. NA - trial does not have multiple co-primary outcomes		7. NA - PROs not primary	7. NA - PROs not secondary	6. NA - trial does not have PROs as primary outcome(s)	2. No	2. No	1. Yes, for (co)primary	7. Pilot study or realistic difference	realistic	4. NA		1. Yes	"2. Government, international agency, university","3. Foundation, special interest group"	Superiority	Frequentist
2035	2018	Journal of the American Society of Nephrology	8.547	No	No	Treatment	ClearGuard HD End Cap, Device	b. USA	a. Clinical	b. Cluster randomized trial	1. Yes, one primary	3. No - There are no PROs	3. NA - trial does not have multiple co-primary outcomes		7. NA - PROs not primary	7. NA - PROs not secondary	6. NA - trial does not have PROs as primary outcome(s)	2. No	2. No	3. No	13. No SS calc	N/A or unclear	4. NA		4. NA - no sample size calculation	1. Industry	Superiority	Frequentist
5377	2018	Disability & Health Journal	1.471	No	No	Supportive Care	MAPSS-MS, Behavioral; Usual Care plus computer games, Other	b. USA	a. Clinical	a. Individually randomized trial (Skip Q12)	4. No or unclear	2. Yes - PRO is secondary (not primary outcome)	2. No		7. NA - PROs not primary	2. Functional status,3. Symptoms/symptom burden,6. Other (specify)	4. No	2. No	2. No	2. Yes, but not for (co)primary	7. Pilot study or realistic difference	realistic	4. NA	0.28	2. No	"2. Government, international agency, university"	Superiority	Frequentist
5175	2018	BMJ Open	2.376	No	No	Treatment	Optimization strategy (complex intervention), Other	d. Other European Union (EU) country	a. Clinical	b. Cluster randomized trial	1. Yes, one primary	2. Yes - PRO is secondary (not primary outcome)	3. NA - trial does not have multiple co-primary outcomes		7. NA - PROs not primary	2. Functional status,1. HRQoL or QoL,5. Patient experience,3. Symptoms/symptom burden,6. Other (specify)	6. NA - trial does not have PROs as primary outcome(s)	2. No	2. No	1. Yes, for (co)primary	7. Pilot study or realistic difference,4. Standardized effect size	both	4. NA		1. Yes	"2. Government, international agency, university"	Superiority	Frequentist
7042	2018	JAMA Internal Medicine	20.768	No	No	Health Services Research	DT LVAD Decision Support Intervention, Behavioral	b. USA	a. Clinical	b. Cluster randomized trial	4. No or unclear	1. Yes - PRO is primary or co-primary outcome	2. No		5. Patient experience	1. HRQoL or QoL,3. Symptoms/symptom burden	2. Yes, patient consultation	1. Yes	1. Yes	1. Yes, for (co)primary	10. Target difference not justified	N/A or unclear	4. NA	0.56	1. Yes	"2. Government, international agency, university"	Superiority	Frequentist
5491	2018	New England Journal of Medicine	70.67	No	No	Treatment	0.9% Saline, Other; Physiologically-balanced isotonic crystalloid, Other	b. USA	a. Clinical	b. Cluster randomized trial	1. Yes, one primary	3. No - There are no PROs	3. NA - trial does not have multiple co-primary outcomes		7. NA - PROs not primary	7. NA - PROs not secondary	6. NA - trial does not have PROs as primary outcome(s)	2. No	2. No	1. Yes, for (co)primary	7. Pilot study or realistic difference	realistic	4. NA		2. No	"2. Government, international agency, university"	Superiority	Frequentist
2141	2019	Psychological Medicine	5.641	No	No	Treatment	MBCT for ADHD, Behavioral	d. Other European Union (EU) country	a. Clinical	a. Individually randomized trial (Skip Q12)	1. Yes, one primary	2. Yes - PRO is secondary (not primary outcome)	3. NA - trial does not have multiple co-primary outcomes		7. NA - PROs not primary	2. Functional status,3. Symptoms/symptom burden,6. Other (specify)	6. NA - trial does not have PROs as primary outcome(s)	2. No	2. No	1. Yes, for (co)primary	7. Pilot study or realistic difference	realistic	4. NA		1. Yes	"2. Government, international agency, university"	Superiority	Frequentist
7053	2018	American Journal of Tropical Medicine & Hygiene	2.315	Missing data	Missing data	Treatment	Hygiene promotion sessions, Behavioral; Household WASH package, Device; Household visit, Behavioral; Group discussions after successful discharge, Behavioral; Outpatient Therapeutic Programme, Procedure	f. Low or Middle Income Country (LMIC)	b. Public health	b. Cluster randomized trial	1. Yes, one primary	3. No - There are no PROs	3. NA - trial does not have multiple co-primary outcomes		7. NA - PROs not primary	7. NA - PROs not secondary	6. NA - trial does not have PROs as primary outcome(s)	2. No	2. No	1. Yes, for (co)primary	7. Pilot study or realistic difference	realistic	4. NA		2. No	"3. Foundation, special interest group","2. Government, international agency, university"	Superiority	Frequentist
5205	2018	JAMA	51.273	No	No	Treatment	Opioid-intensive prescribing strategy, Other; Opioid-avoidant prescribing strategy, Other	b. USA	a. Clinical	a. Individually randomized trial (Skip Q12)	4. No or unclear	1. Yes - PRO is primary or co-primary outcome	3. NA - trial does not have multiple co-primary outcomes		2. Functional status	3. Symptoms/symptom burden,1. HRQoL or QoL,2. Functional status,6. Other (specify)	4. No	2. No	2. No	1. Yes, for (co)primary	5. Stakeholder/patient opinion	important	4. NA	0.37	3. Unclear or other	"2. Government, international agency, university"	Superiority	Frequentist
4660	2018	Annals of Family Medicine	4.185	No	No	Treatment	Use of Asthma APGAR system and tools, Behavioral; Asthma APGAR tools, Behavioral	b. USA	a. Clinical	b. Cluster randomized trial	4. No or unclear	1. Yes - PRO is primary or co-primary outcome	2. No		6. Other (specify),3. Symptoms/symptom burden,1. HRQoL or QoL	7. NA - PROs not secondary	4. No	2. No	2. No	1. Yes, for (co)primary	1. Anchor,2. Distribution	important	4. NA		2. No	"2. Government, international agency, university"	Superiority	Frequentist
2866	2018	Psychiatry	1.873	No	No	Health Services Research	Stepped Care Management, Behavioral	b. USA	a. Clinical	a. Individually randomized trial (Skip Q12)	1. Yes, one primary	1. Yes - PRO is primary or co-primary outcome	3. NA - trial does not have multiple co-primary outcomes	N/A	6. Other (specify)	1. HRQoL or QoL,2. Functional status,4. Health behaviours,3. Symptoms/symptom burden,5. Patient experience	4. No	2. No	2. No	3. No	13. No SS calc	N/A or unclear	4. NA		4. NA - no sample size calculation	"2. Government, international agency, university"	Superiority	Frequentist
2285	2018	Journal of General Internal Medicine	4.606	No	No	Screening	CHW Outreach and HPV Self-sampling, Behavioral; CHW Outreach, Behavioral	b. USA	b. Public health	a. Individually randomized trial (Skip Q12)	1. Yes, one primary	1. Yes - PRO is primary or co-primary outcome	3. NA - trial does not have multiple co-primary outcomes		4. Health behaviours	7. NA - PROs not secondary	4. No	2. No	2. No	1. Yes, for (co)primary	7. Pilot study or realistic difference	realistic	4. NA		2. No	"2. Government, international agency, university"	Superiority	Frequentist
2916	2018	British Journal of Surgery	5.586	No	No	Prevention	Inspiratory Muscle Training (IMT), Other	d. Other European Union (EU) country	a. Clinical	a. Individually randomized trial (Skip Q12)	1. Yes, one primary	3. No - There are no PROs	3. NA - trial does not have multiple co-primary outcomes		7. NA - PROs not primary	1. HRQoL or QoL,2. Functional status,4. Health behaviours	6. NA - trial does not have PROs as primary outcome(s)	2. No	2. No	1. Yes, for (co)primary	7. Pilot study or realistic difference	realistic	4. NA		1. Yes	"2. Government, international agency, university","3. Foundation, special interest group"	Superiority	Frequentist
5612	2018	Scandinavian Journal of Trauma, Resuscitation & Emergency Medicine	2.556	No	No	Health Services Research	hospital specialist, Other; General Practitioner, Other	d. Other European Union (EU) country	a. Clinical	a. Individually randomized trial (Skip Q12)	1. Yes, one primary	2. Yes - PRO is secondary (not primary outcome)	3. NA - trial does not have multiple co-primary outcomes		7. NA - PROs not primary	1. HRQoL or QoL	6. NA - trial does not have PROs as primary outcome(s)	2. No	2. No	1. Yes, for (co)primary	11. Authors state difference is important	important	4. NA		2. No	"2. Government, international agency, university"	Superiority	Frequentist
4716	2018	Obesity	3.969	No	No	Prevention	Strong Hearts, Healthy Communities, Behavioral; Strong Hearts, Healthy Women, Behavioral	b. USA	b. Public health	a. Individually randomized trial (Skip Q12)	2. Yes, two co-primaries	3. No - There are no PROs	2. No		7. NA - PROs not primary	7. NA - PROs not secondary	6. NA - trial does not have PROs as primary outcome(s)	2. No	2. No	1. Yes, for (co)primary	7. Pilot study or realistic difference	realistic	4. NA		2. No	"2. Government, international agency, university"	Superiority	Frequentist
3325	2018	Resuscitation	4.572	Missing data	Missing data	Prevention	ALARM intervention, Other	d. Other European Union (EU) country	a. Clinical	b. Cluster randomized trial	2. Yes, two co-primaries	3. No - There are no PROs	2. No		7. NA - PROs not primary	7. NA - PROs not secondary	6. NA - trial does not have PROs as primary outcome(s)	2. No	1. Yes	1. Yes, for (co)primary	9. Calculated the detectable difference given sample size	N/A or unclear	4. NA		2. No	"2. Government, international agency, university"	Superiority	Frequentist
7431	2018	American Journal of Kidney Diseases	6.653	No	No	Treatment	CKD Registry, Other	b. USA	a. Clinical	b. Cluster randomized trial	1. Yes, one primary	3. No - There are no PROs	3. NA - trial does not have multiple co-primary outcomes		7. NA - PROs not primary	7. NA - PROs not secondary	6. NA - trial does not have PROs as primary outcome(s)	2. No	2. No	1. Yes, for (co)primary	7. Pilot study or realistic difference	realistic	4. NA		2. No	"2. Government, international agency, university"	Superiority	Frequentist
2998	2018	Journal of Child Psychology & Psychiatry & Allied Disciplines	6.13	Yes	No	Diagnostic	Qb Test, Other	c. UK	a. Clinical	a. Individually randomized trial (Skip Q12)	1. Yes, one primary	3. No - There are no PROs	3. NA - trial does not have multiple co-primary outcomes		7. NA - PROs not primary	7. NA - PROs not secondary	6. NA - trial does not have PROs as primary outcome(s)	2. No	2. No	1. Yes, for (co)primary	7. Pilot study or realistic difference	both	4. NA		2. No	1. Industry,"2. Government, international agency, university"	Superiority	Frequentist
4512	2018	PLoS Medicine / Public Library of Science	11.048	No	No	Treatment	WHO CVD risk assessment package, Behavioral; Health Insurance only, Behavioral	f. Low or Middle Income Country (LMIC)	a. Clinical	b. Cluster randomized trial	1. Yes, one primary	2. Yes - PRO is secondary (not primary outcome)	3. NA - trial does not have multiple co-primary outcomes		7. NA - PROs not primary	4. Health behaviours	6. NA - trial does not have PROs as primary outcome(s)	2. No	2. No	1. Yes, for (co)primary	7. Pilot study or realistic difference	realistic	4. NA		2. No	"2. Government, international agency, university"	Superiority	Frequentist
7264	2018	BMJ Paediatrics Open	0.62	Yes	No	Treatment	Home-based nutrition education, Behavioral; Standard-of-care nutrition support, Dietary Supplement	g. Other developed	a. Clinical	a. Individually randomized trial (Skip Q12)	1. Yes, one primary	3. No - There are no PROs	3. NA - trial does not have multiple co-primary outcomes		7. NA - PROs not primary	7. NA - PROs not secondary	6. NA - trial does not have PROs as primary outcome(s)	2. No	1. Yes	1. Yes, for (co)primary	7. Pilot study or realistic difference	realistic	4. NA		1. Yes	"3. Foundation, special interest group"	Superiority	Frequentist
7313	2018	Journal of General Internal Medicine	4.606	No	No	Health Services Research	Shared decision making with a Prevention Coach, Behavioral	b. USA	a. Clinical	a. Individually randomized trial (Skip Q12)	1. Yes, one primary	1. Yes - PRO is primary or co-primary outcome	3. NA - trial does not have multiple co-primary outcomes	Yes	4. Health behaviours	2. Functional status	4. No	2. No	2. No	1. Yes, for (co)primary	10. Target difference not justified	N/A or unclear	4. NA		2. No	"3. Foundation, special interest group"	Superiority	Frequentist
3777	2018	New England Journal of Medicine	70.67	No	No	Supportive Care	Liberal fluid therapy, Other; Restrictive fluid therapy, Other	h. Unclear,a. Canada ,e. Australia or New Zealand,d. Other European Union (EU) country ,b. USA ,c. UK ,g. Other developed	a. Clinical	a. Individually randomized trial (Skip Q12)	1. Yes, one primary	1. Yes - PRO is primary or co-primary outcome	3. NA - trial does not have multiple co-primary outcomes		2. Functional status	7. NA - PROs not secondary	4. No	2. No	2. No	1. Yes, for (co)primary	10. Target difference not justified	N/A or unclear	4. NA		1. Yes	"2. Government, international agency, university"	Superiority	Frequentist
6929	2018	Contraception	2.928	No	No	Health Services Research	Transabdominal sonography, Procedure; Transvaginal sonography, Procedure	b. USA	a. Clinical	a. Individually randomized trial (Skip Q12)	2. Yes, two co-primaries	1. Yes - PRO is primary or co-primary outcome	1. Yes		5. Patient experience	6. Other (specify)	4. No	2. No	2. No	1. Yes, for (co)primary	10. Target difference not justified	N/A or unclear	2. Clinical outcome		2. No	"3. Foundation, special interest group"	Non-inferiority	Frequentist
4401	2018	Annals of Family Medicine	4.185	No	No	Supportive Care	Nurse case management and self-management support, Other	a. Canada	a. Clinical	a. Individually randomized trial (Skip Q12)	1. Yes, one primary	1. Yes - PRO is primary or co-primary outcome	3. NA - trial does not have multiple co-primary outcomes		3. Symptoms/symptom burden	6. Other (specify)	4. No	2. No	2. No	3. No	13. No SS calc	N/A or unclear	4. NA		4. NA - no sample size calculation	1. Industry	Superiority	Frequentist
3826	2018	New England Journal of Medicine	70.67	No	No	Treatment	E-cigarette free access, Behavioral; E-cigarette/NRT/Zyban/Chantix Choice, Behavioral; Outcome Incentive arm, Behavioral; Loss framing incentive arm, Behavioral; Control, Behavioral	b. USA	a. Clinical	a. Individually randomized trial (Skip Q12)	1. Yes, one primary	3. No - There are no PROs	3. NA - trial does not have multiple co-primary outcomes		7. NA - PROs not primary	7. NA - PROs not secondary	6. NA - trial does not have PROs as primary outcome(s)	2. No	2. No	1. Yes, for (co)primary	10. Target difference not justified	N/A or unclear	4. NA		2. No	"2. Government, international agency, university","3. Foundation, special interest group"	Superiority	Frequentist
3225	2018	Critical Care (London, England)	6.959	No	No	Treatment	Goal-directed Resuscitation Therapy (GDT), Other; Standard protocol, Other	f. Low or Middle Income Country (LMIC)	a. Clinical	a. Individually randomized trial (Skip Q12)	1. Yes, one primary	3. No - There are no PROs	3. NA - trial does not have multiple co-primary outcomes		7. NA - PROs not primary	7. NA - PROs not secondary	6. NA - trial does not have PROs as primary outcome(s)	2. No	2. No	1. Yes, for (co)primary	7. Pilot study or realistic difference	realistic	4. NA		2. No	"2. Government, international agency, university",1. Industry	Superiority	Frequentist
4109	2018	JAMA	51.273	No	No	Treatment	CT-scan, CEA, X-ray of lungs, Procedure; CT-scan, CEA, X-ray of lungs, Procedure	d. Other European Union (EU) country ,g. Other developed	a. Clinical	a. Individually randomized trial (Skip Q12)	2. Yes, two co-primaries	3. No - There are no PROs	2. No		7. NA - PROs not primary	7. NA - PROs not secondary	6. NA - trial does not have PROs as primary outcome(s)	2. No	2. No	1. Yes, for (co)primary	6. Evidence review	realistic	4. NA		1. Yes	"3. Foundation, special interest group","2. Government, international agency, university"	Superiority	Frequentist
7495	2018	CMAJ Canadian Medical Association Journal	6.938	No	No	Prevention	CHAP-EMS/CP@clinic, Behavioral	a. Canada	a. Clinical	b. Cluster randomized trial	1. Yes, one primary	2. Yes - PRO is secondary (not primary outcome)	3. NA - trial does not have multiple co-primary outcomes		7. NA - PROs not primary	4. Health behaviours,1. HRQoL or QoL	6. NA - trial does not have PROs as primary outcome(s)	2. No	1. Yes	1. Yes, for (co)primary	5. Stakeholder/patient opinion	important	4. NA		2. No	"2. Government, international agency, university","3. Foundation, special interest group"	Superiority	Frequentist
2722	2018	Psychiatry Research	2.208	No	No	Treatment	Cognitive behavioural therapy (stress management), Other; Cognitive Behavioural Therapy (cognitive restructuring), Other	d. Other European Union (EU) country	a. Clinical	a. Individually randomized trial (Skip Q12)	1. Yes, one primary	1. Yes - PRO is primary or co-primary outcome	3. NA - trial does not have multiple co-primary outcomes		3. Symptoms/symptom burden	3. Symptoms/symptom burden,2. Functional status	4. No	2. No	2. No	3. No	13. No SS calc	N/A or unclear	4. NA		4. NA - no sample size calculation	"3. Foundation, special interest group"	Superiority	Frequentist
3305	2018	Lancet	59.102	No	No	Treatment	Diuretics plus human albumin, Drug; Diuretics (standard medical treatment), Drug	d. Other European Union (EU) country	a. Clinical	a. Individually randomized trial (Skip Q12)	1. Yes, one primary	2. Yes - PRO is secondary (not primary outcome)	3. NA - trial does not have multiple co-primary outcomes		7. NA - PROs not primary	1. HRQoL or QoL	6. NA - trial does not have PROs as primary outcome(s)	2. No	2. No	1. Yes, for (co)primary	7. Pilot study or realistic difference	realistic	4. NA		1. Yes	"2. Government, international agency, university"	Superiority	Frequentist
2936	2018	Injury	1.834	No	Yes	Health Services Research	PFF evidence based pathway, Other	d. Other European Union (EU) country	a. Clinical	b. Cluster randomized trial	1. Yes, one primary	2. Yes - PRO is secondary (not primary outcome)	3. NA - trial does not have multiple co-primary outcomes		7. NA - PROs not primary	2. Functional status,1. HRQoL or QoL	6. NA - trial does not have PROs as primary outcome(s)	3. Unclear or other (specify)	2. No	3. No	13. No SS calc	N/A or unclear	4. NA		4. NA - no sample size calculation	1. Industry,"3. Foundation, special interest group"	Superiority	Frequentist
3519	2018	Circulation. Cardiovascular Quality & Outcomes	4.378	No	No	Treatment	PHCVRS Intervention, Other; Personal Health Record, Other	b. USA	a. Clinical	b. Cluster randomized trial	1. Yes, one primary	3. No - There are no PROs	3. NA - trial does not have multiple co-primary outcomes		7. NA - PROs not primary	7. NA - PROs not secondary	6. NA - trial does not have PROs as primary outcome(s)	2. No	2. No	1. Yes, for (co)primary	6. Evidence review	realistic	4. NA		1. Yes	"2. Government, international agency, university"	Superiority	Frequentist
2922	2018	Journal of Pediatrics	3.739	Yes	No	Prevention	Motivational Interview, Behavioral; Traditional health education, Other	f. Low or Middle Income Country (LMIC)	a. Clinical	b. Cluster randomized trial	4. No or unclear	3. No - There are no PROs	3. NA - trial does not have multiple co-primary outcomes		7. NA - PROs not primary	7. NA - PROs not secondary	6. NA - trial does not have PROs as primary outcome(s)	2. No	2. No	1. Yes, for (co)primary	7. Pilot study or realistic difference	realistic	4. NA		1. Yes	"2. Government, international agency, university"	Superiority	Frequentist
6754	2018	Age & Ageing	4.511	No	Yes	Health Services Research	QDU, Other; DIM, Other	d. Other European Union (EU) country	a. Clinical	a. Individually randomized trial (Skip Q12)	1. Yes, one primary	3. No - There are no PROs	3. NA - trial does not have multiple co-primary outcomes		7. NA - PROs not primary	7. NA - PROs not secondary	6. NA - trial does not have PROs as primary outcome(s)	2. No	2. No	1. Yes, for (co)primary	10. Target difference not justified	N/A or unclear	4. NA		1. Yes	"2. Government, international agency, university"	Superiority	Frequentist
6647	2018	Journal of Medical Internet Research	4.945	No	No	Supportive Care	My Tools 4 Care, Behavioral	a. Canada	a. Clinical	a. Individually randomized trial (Skip Q12)	1. Yes, one primary	1. Yes - PRO is primary or co-primary outcome	3. NA - trial does not have multiple co-primary outcomes		3. Symptoms/symptom burden	3. Symptoms/symptom burden,6. Other (specify)	4. No	2. No	3. Unclear or other (specify)	3. No	13. No SS calc	N/A or unclear	4. NA		4. NA - no sample size calculation	"2. Government, international agency, university"	Superiority	Frequentist
3859	2018	BJOG: An International Journal of Obstetrics & Gynaecology	5.193	No	No	Supportive Care	Instruction in self-referral, Other	d. Other European Union (EU) country	a. Clinical	a. Individually randomized trial (Skip Q12)	1. Yes, one primary	1. Yes - PRO is primary or co-primary outcome	3. NA - trial does not have multiple co-primary outcomes		6. Other (specify)	1. HRQoL or QoL,6. Other (specify),3. Symptoms/symptom burden	1. Yes, lit citation or explanation	1. Yes	2. No	1. Yes, for (co)primary	4. Standardized effect size	important	4. NA	0.5	1. Yes	"2. Government, international agency, university"	Superiority	Frequentist
6879	2018	Annals of Emergency Medicine	5.209	Missing data	Missing data	Other	point-of-care ultrasound, Other	b. USA	a. Clinical	a. Individually randomized trial (Skip Q12)	1. Yes, one primary	3. No - There are no PROs	3. NA - trial does not have multiple co-primary outcomes		7. NA - PROs not primary	7. NA - PROs not secondary	6. NA - trial does not have PROs as primary outcome(s)	2. No	2. No	1. Yes, for (co)primary	10. Target difference not justified	important	4. NA		1. Yes	5. Not specified	Superiority	Frequentist
3570	2018	Annals of Family Medicine	4.185	Yes	No	Treatment	GP-parent information-exchange tool, Behavioral	d. Other European Union (EU) country	a. Clinical	b. Cluster randomized trial	1. Yes, one primary	2. Yes - PRO is secondary (not primary outcome)	3. NA - trial does not have multiple co-primary outcomes		7. NA - PROs not primary	3. Symptoms/symptom burden,5. Patient experience,6. Other (specify)	6. NA - trial does not have PROs as primary outcome(s)	2. No	2. No	1. Yes, for (co)primary	10. Target difference not justified	N/A or unclear	4. NA		1. Yes	"2. Government, international agency, university"	Superiority	Frequentist
3877	2018	BMC Medicine	8.285	No	No	Treatment	Sertraline, Drug; Mirtazapine, Drug	g. Other developed	a. Clinical	b. Cluster randomized trial	1. Yes, one primary	1. Yes - PRO is primary or co-primary outcome	3. NA - trial does not have multiple co-primary outcomes		3. Symptoms/symptom burden	3. Symptoms/symptom burden	4. No	2. No	2. No	1. Yes, for (co)primary	4. Standardized effect size	important	4. NA	0.2	2. No	1. Industry,"2. Government, international agency, university"	Superiority	Frequentist
1790	2018	Cancer Causes & Control	2.3	No	No	Screening	CHW and Self-sampling for Cervical Cancer, Behavioral; Mailed Self Sampler, Behavioral	b. USA	b. Public health	a. Individually randomized trial (Skip Q12)	1. Yes, one primary	2. Yes - PRO is secondary (not primary outcome)	3. NA - trial does not have multiple co-primary outcomes		7. NA - PROs not primary	6. Other (specify)	6. NA - trial does not have PROs as primary outcome(s)	2. No	2. No	2. Yes, but not for (co)primary	8. No target difference stated	N/A or unclear	4. NA		2. No	"2. Government, international agency, university"	Superiority	Frequentist
4149	2018	JAMA	51.273	No	No	Prevention	iRhythm ZIO XT Patch, Device; Wristband by Amiigo, Device	b. USA	b. Public health	a. Individually randomized trial (Skip Q12)	1. Yes, one primary	3. No - There are no PROs	3. NA - trial does not have multiple co-primary outcomes		7. NA - PROs not primary	7. NA - PROs not secondary	6. NA - trial does not have PROs as primary outcome(s)	2. No	2. No	1. Yes, for (co)primary	7. Pilot study or realistic difference	realistic	4. NA		2. No	1. Industry,"2. Government, international agency, university","3. Foundation, special interest group"	Superiority	Frequentist
4100	2018	Physiotherapy Research International	0.48	No	No	Treatment	Individual NPMP to the participants, Behavioral	g. Other developed	a. Clinical	a. Individually randomized trial (Skip Q12)	1. Yes, one primary	1. Yes - PRO is primary or co-primary outcome	3. NA - trial does not have multiple co-primary outcomes	Yes	1. HRQoL or QoL	3. Symptoms/symptom burden,2. Functional status,6. Other (specify)	4. No	2. No	2. No	1. Yes, for (co)primary	7. Pilot study or realistic difference	both	4. NA		2. No	5. Not specified	Superiority	Frequentist
2508	2018	Cancer	6.102	No	No	Screening	Screening invitation (with education), Behavioral; Self-collection for HPV testing, Behavioral	b. USA	a. Clinical	a. Individually randomized trial (Skip Q12)	1. Yes, one primary	3. No - There are no PROs	3. NA - trial does not have multiple co-primary outcomes		7. NA - PROs not primary	7. NA - PROs not secondary	6. NA - trial does not have PROs as primary outcome(s)	2. No	2. No	3. No	13. No SS calc	N/A or unclear	4. NA		4. NA - no sample size calculation	"2. Government, international agency, university"	Superiority	Frequentist
3833	2018	Lancet	59.102	No	No	Treatment	Type AB plasma, Biological; Crystalloid fluid (standard of care for resuscitation), Drug	b. USA	a. Clinical	b. Cluster randomized trial	1. Yes, one primary	3. No - There are no PROs	3. NA - trial does not have multiple co-primary outcomes		7. NA - PROs not primary	7. NA - PROs not secondary	6. NA - trial does not have PROs as primary outcome(s)	1. Yes	2. No	2. Yes, but not for (co)primary	7. Pilot study or realistic difference	realistic	4. NA		2. No	"2. Government, international agency, university"	Superiority	Bayesian
7278	2018	Journal of Bone & Mineral Research	5.711	No	No	Health Services Research	case management, Other; Multifaceted quality improvement intervention, Other	a. Canada	a. Clinical	a. Individually randomized trial (Skip Q12)	1. Yes, one primary	2. Yes - PRO is secondary (not primary outcome)	3. NA - trial does not have multiple co-primary outcomes		7. NA - PROs not primary	1. HRQoL or QoL,4. Health behaviours	4. No	2. No	2. No	1. Yes, for (co)primary	7. Pilot study or realistic difference	both	4. NA		1. Yes	"2. Government, international agency, university"	Superiority	Frequentist
3819	2018	New England Journal of Medicine	70.67	No	No	Health Services Research	infusion of 2 units of plasma, Biological	b. USA	a. Clinical	b. Cluster randomized trial	1. Yes, one primary	3. No - There are no PROs	3. NA - trial does not have multiple co-primary outcomes		7. NA - PROs not primary	7. NA - PROs not secondary	6. NA - trial does not have PROs as primary outcome(s)	2. No	2. No	1. Yes, for (co)primary	6. Evidence review	realistic	4. NA		1. Yes	"2. Government, international agency, university"	Superiority	Frequentist
1736	2018	Clinical Infectious Diseases	9.055	No	No	Other	GeneXpert, Other; LED Microscopy, Other	f. Low or Middle Income Country (LMIC)	a. Clinical	b. Cluster randomized trial	1. Yes, one primary	3. No - There are no PROs	3. NA - trial does not have multiple co-primary outcomes		7. NA - PROs not primary	7. NA - PROs not secondary	6. NA - trial does not have PROs as primary outcome(s)	2. No	2. No	1. Yes, for (co)primary	9. Calculated the detectable difference given sample size	realistic	4. NA		2. No	"2. Government, international agency, university","3. Foundation, special interest group"	Superiority	Frequentist
2162	2018	Thorax	9.64	No	No	Health Services Research	Primary Care-based management, Other; Standard management, Other	d. Other European Union (EU) country	a. Clinical	a. Individually randomized trial (Skip Q12)	2. Yes, two co-primaries	1. Yes - PRO is primary or co-primary outcome	2. No		3. Symptoms/symptom burden,1. HRQoL or QoL	5. Patient experience	4. No	2. No	2. No	1. Yes, for (co)primary	5. Stakeholder/patient opinion,4. Standardized effect size	both	4. NA	0.3	1. Yes	"2. Government, international agency, university"	Non-inferiority	Frequentist
2811	2019	BJOG: An International Journal of Obstetrics & Gynaecology	5.193	No	No	Prevention	iNPWT, Device; Standard postoperative wound dressing, Other	d. Other European Union (EU) country	a. Clinical	a. Individually randomized trial (Skip Q12)	1. Yes, one primary	2. Yes - PRO is secondary (not primary outcome)	3. NA - trial does not have multiple co-primary outcomes		7. NA - PROs not primary	1. HRQoL or QoL	6. NA - trial does not have PROs as primary outcome(s)	1. Yes	2. No	1. Yes, for (co)primary	10. Target difference not justified	N/A or unclear	4. NA		2. No	1. Industry,"2. Government, international agency, university"	Superiority	Frequentist
2950	2019	Hepatology	14.971	No	No	Health Services Research	Mailed Outreach Invitation, Other; Mailed Outreach Invitation and Patient Navigation, Other	b. USA	a. Clinical	a. Individually randomized trial (Skip Q12)	1. Yes, one primary	3. No - There are no PROs	3. NA - trial does not have multiple co-primary outcomes		7. NA - PROs not primary	7. NA - PROs not secondary	6. NA - trial does not have PROs as primary outcome(s)	2. No	2. No	1. Yes, for (co)primary	10. Target difference not justified	N/A or unclear	4. NA		2. No	"2. Government, international agency, university"	Superiority	Frequentist
6900	2018	Journal of the American Academy of Child & Adolescent Psychiatry	6.391	Yes	No	Treatment	New Forest Parenting Programme, Behavioral; Treatment as usual, Behavioral	d. Other European Union (EU) country	a. Clinical	a. Individually randomized trial (Skip Q12)	1. Yes, one primary	1. Yes - PRO is primary or co-primary outcome	3. NA - trial does not have multiple co-primary outcomes		3. Symptoms/symptom burden	2. Functional status,3. Symptoms/symptom burden,6. Other (specify)	4. No	2. No	2. No	1. Yes, for (co)primary	4. Standardized effect size	N/A or unclear	4. NA	0.5	1. Yes	"2. Government, international agency, university","3. Foundation, special interest group"	Superiority	Frequentist
3886	2019	Scandinavian Journal of Public Health	1.761	No	No	Health Services Research	Counselling and education individually and in groups, Behavioral	g. Other developed	b. Public health	a. Individually randomized trial (Skip Q12)	1. Yes, one primary	3. No - There are no PROs	3. NA - trial does not have multiple co-primary outcomes		7. NA - PROs not primary	7. NA - PROs not secondary	6. NA - trial does not have PROs as primary outcome(s)	1. Yes	1. Yes	1. Yes, for (co)primary	10. Target difference not justified	N/A or unclear	4. NA		2. No	"2. Government, international agency, university"	Superiority	Frequentist
3123	2018	Journal of General Internal Medicine	4.606	No	No	Prevention	Baseline alert, Other	b. USA	a. Clinical	a. Individually randomized trial (Skip Q12)	1. Yes, one primary	3. No - There are no PROs	3. NA - trial does not have multiple co-primary outcomes		7. NA - PROs not primary	7. NA - PROs not secondary	6. NA - trial does not have PROs as primary outcome(s)	2. No	2. No	1. Yes, for (co)primary	11. Authors state difference is important	important	4. NA		2. No	1. Industry,"2. Government, international agency, university","3. Foundation, special interest group"	Superiority	Frequentist
7123	2018	JAMA Internal Medicine	20.768	No	No	Health Services Research	Telepharmacist intervention, Behavioral	b. USA	a. Clinical	b. Cluster randomized trial	1. Yes, one primary	3. No - There are no PROs	3. NA - trial does not have multiple co-primary outcomes		7. NA - PROs not primary	7. NA - PROs not secondary	6. NA - trial does not have PROs as primary outcome(s)	2. No	2. No	1. Yes, for (co)primary	10. Target difference not justified	N/A or unclear	4. NA		2. No	"2. Government, international agency, university"	Superiority	Frequentist
7052	2018	JAMA Internal Medicine	20.768	No	No	Screening	Auto Plus, Other	b. USA	b. Public health	b. Cluster randomized trial	1. Yes, one primary	3. No - There are no PROs	3. NA - trial does not have multiple co-primary outcomes		7. NA - PROs not primary	7. NA - PROs not secondary	6. NA - trial does not have PROs as primary outcome(s)	1. Yes	1. Yes	3. No	13. No SS calc	N/A or unclear	4. NA		4. NA - no sample size calculation	"2. Government, international agency, university"	Superiority	Frequentist
2830	2018	Human Reproduction	5.506	No	No	Screening	Polar Body Biopsy, Other	d. Other European Union (EU) country ,g. Other developed	a. Clinical	a. Individually randomized trial (Skip Q12)	1. Yes, one primary	4. Unclear or other (specify)	3. NA - trial does not have multiple co-primary outcomes		7. NA - PROs not primary	7. NA - PROs not secondary	6. NA - trial does not have PROs as primary outcome(s)	2. No	2. No	1. Yes, for (co)primary	10. Target difference not justified	N/A or unclear	4. NA		2. No	1. Industry,"2. Government, international agency, university"	Superiority	Frequentist
3612	2019	Journal of General Internal Medicine	4.606	No	No	Health Services Research	CHS Transition Services, Other	b. USA	a. Clinical	a. Individually randomized trial (Skip Q12)	1. Yes, one primary	3. No - There are no PROs	3. NA - trial does not have multiple co-primary outcomes		7. NA - PROs not primary	7. NA - PROs not secondary	6. NA - trial does not have PROs as primary outcome(s)	2. No	2. No	1. Yes, for (co)primary	6. Evidence review	realistic	4. NA		1. Yes	"2. Government, international agency, university"	Superiority	Frequentist
2259	2018	Clinical Journal of The American Society of Nephrology: CJASN	6.243	No	No	Supportive Care	navigator, Other	b. USA	a. Clinical	b. Cluster randomized trial	2. Yes, two co-primaries	3. No - There are no PROs	2. No		7. NA - PROs not primary	7. NA - PROs not secondary	6. NA - trial does not have PROs as primary outcome(s)	2. No	2. No	1. Yes, for (co)primary	6. Evidence review	realistic	4. NA		2. No	"2. Government, international agency, university"	Superiority	Frequentist
1977	2018	PLoS Medicine / Public Library of Science	11.048	No	No	Health Services Research	Crowdsourced intervention, Behavioral; Traditional intervention campaign, Behavioral	g. Other developed	b. Public health	b. Cluster randomized trial	1. Yes, one primary	1. Yes - PRO is primary or co-primary outcome	3. NA - trial does not have multiple co-primary outcomes		4. Health behaviours	4. Health behaviours	4. No	1. Yes	2. No	1. Yes, for (co)primary	7. Pilot study or realistic difference	realistic	4. NA	10% increase in testing rate	1. Yes	"2. Government, international agency, university","3. Foundation, special interest group"	Superiority	Frequentist
3663	2018	Scandinavian Journal of Trauma, Resuscitation & Emergency Medicine	2.556	No	No	Prevention	suPAR measurement, Behavioral	d. Other European Union (EU) country	a. Clinical	b. Cluster randomized trial	1. Yes, one primary	3. No - There are no PROs	3. NA - trial does not have multiple co-primary outcomes		7. NA - PROs not primary	7. NA - PROs not secondary	6. NA - trial does not have PROs as primary outcome(s)	2. No	2. No	1. Yes, for (co)primary	10. Target difference not justified	N/A or unclear	4. NA		2. No	1. Industry	Superiority	Frequentist
4588	2018	Lancet	59.102	No	No	Treatment	Remote Patient Management, Device; Usual Care, Other	d. Other European Union (EU) country	a. Clinical	a. Individually randomized trial (Skip Q12)	1. Yes, one primary	2. Yes - PRO is secondary (not primary outcome)	3. NA - trial does not have multiple co-primary outcomes		7. NA - PROs not primary	2. Functional status	6. NA - trial does not have PROs as primary outcome(s)	2. No	2. No	1. Yes, for (co)primary	7. Pilot study or realistic difference	realistic	4. NA		2. No	"2. Government, international agency, university"	Superiority	Frequentist
4141	2018	JAMA	51.273	No	No	Treatment	Endotracheal Intubation, Device; Laryngeal Tube (King), Device	b. USA	a. Clinical	b. Cluster randomized trial	1. Yes, one primary	3. No - There are no PROs	3. NA - trial does not have multiple co-primary outcomes		7. NA - PROs not primary	7. NA - PROs not secondary	6. NA - trial does not have PROs as primary outcome(s)	2. No	2. No	1. Yes, for (co)primary	7. Pilot study or realistic difference	realistic	4. NA		2. No	1. Industry,"2. Government, international agency, university"	Superiority	Frequentist
4503	2018	Lancet	59.102	No	No	Diagnostic	High-sensitivity troponin I assay, Device	c. UK	a. Clinical	b. Cluster randomized trial	1. Yes, one primary	3. No - There are no PROs	3. NA - trial does not have multiple co-primary outcomes		7. NA - PROs not primary	7. NA - PROs not secondary	6. NA - trial does not have PROs as primary outcome(s)	2. No	2. No	1. Yes, for (co)primary	7. Pilot study or realistic difference	N/A or unclear	4. NA		2. No	"3. Foundation, special interest group"	Superiority	Frequentist
7253	2018	BMJ Open	2.376	Yes	No	Treatment	Advice and exercise-based treatment plus joint manipulation, Procedure; Advice and exercise-based treatment, Procedure	d. Other European Union (EU) country	a. Clinical	a. Individually randomized trial (Skip Q12)	1. Yes, one primary	1. Yes - PRO is primary or co-primary outcome	3. NA - trial does not have multiple co-primary outcomes		3. Symptoms/symptom burden	3. Symptoms/symptom burden	4. No	2. No	2. No	1. Yes, for (co)primary	9. Calculated the detectable difference given sample size	N/A or unclear	4. NA		2. No	"3. Foundation, special interest group"	Superiority	Frequentist
2902	2018	PLoS ONE [Electronic Resource]	2.776	No	No	Prevention	maintenance care, Other; Treatment as needed, Other	d. Other European Union (EU) country	a. Clinical	a. Individually randomized trial (Skip Q12)	1. Yes, one primary	1. Yes - PRO is primary or co-primary outcome	3. NA - trial does not have multiple co-primary outcomes		3. Symptoms/symptom burden	1. HRQoL or QoL,2. Functional status,3. Symptoms/symptom burden,4. Health behaviours,5. Patient experience,6. Other (specify)	1. Yes, lit citation or explanation	2. No	2. No	1. Yes, for (co)primary	10. Target difference not justified	N/A or unclear	4. NA		1. Yes	"3. Foundation, special interest group"	Superiority	Frequentist
2026	2018	PLoS Medicine / Public Library of Science	11.048	No	No	Health Services Research	ART home delivery, Other; Enhanced nutrition counseling, Other	f. Low or Middle Income Country (LMIC)	b. Public health	b. Cluster randomized trial	1. Yes, one primary	2. Yes - PRO is secondary (not primary outcome)	3. NA - trial does not have multiple co-primary outcomes		7. NA - PROs not primary	6. Other (specify)	6. NA - trial does not have PROs as primary outcome(s)	2. No	1. Yes	1. Yes, for (co)primary	5. Stakeholder/patient opinion,7. Pilot study or realistic difference	N/A or unclear	4. NA		1. Yes	"2. Government, international agency, university","3. Foundation, special interest group"	Non-inferiority	Frequentist
7413	2018	Annals of Intensive Care	3.931	No	No	Prevention	Clinical Procedure to Prevent Oversedation, Procedure; Usual sedation practice, Procedure	d. Other European Union (EU) country	a. Clinical	a. Individually randomized trial (Skip Q12)	1. Yes, one primary	3. No - There are no PROs	3. NA - trial does not have multiple co-primary outcomes		7. NA - PROs not primary	7. NA - PROs not secondary	6. NA - trial does not have PROs as primary outcome(s)	2. No	2. No	1. Yes, for (co)primary	10. Target difference not justified	N/A or unclear	4. NA		2. No	"2. Government, international agency, university"	Superiority	Frequentist
2428	2018	Heart	5.082	No	No	Treatment	comprehensive CR, Behavioral; exercise-based CR, Other; wait list control, Other	f. Low or Middle Income Country (LMIC)	a. Clinical	a. Individually randomized trial (Skip Q12)	1. Yes, one primary	3. No - There are no PROs	3. NA - trial does not have multiple co-primary outcomes		7. NA - PROs not primary	7. NA - PROs not secondary	6. NA - trial does not have PROs as primary outcome(s)	2. No	2. No	3. No	13. No SS calc	N/A or unclear	4. NA		4. NA - no sample size calculation	"2. Government, international agency, university"	Superiority	Frequentist
2694	2017	JMIR Diabetes		No	No	Supportive Care	Health Coaching and Life-long Monitoring, Procedure	d. Other European Union (EU) country	a. Clinical	a. Individually randomized trial (Skip Q12)	1. Yes, one primary	2. Yes - PRO is secondary (not primary outcome)	3. NA - trial does not have multiple co-primary outcomes		7. NA - PROs not primary	1. HRQoL or QoL	6. NA - trial does not have PROs as primary outcome(s)	2. No	2. No	1. Yes, for (co)primary	10. Target difference not justified	N/A or unclear	4. NA		1. Yes	"2. Government, international agency, university"	Superiority	Frequentist
4118	2018	JAMA	51.273	No	No	Treatment	Immediate pushing, Procedure; Delayed pushing, Procedure	b. USA	a. Clinical	a. Individually randomized trial (Skip Q12)	1. Yes, one primary	2. Yes - PRO is secondary (not primary outcome)	3. NA - trial does not have multiple co-primary outcomes		7. NA - PROs not primary	1. HRQoL or QoL,3. Symptoms/symptom burden,5. Patient experience	6. NA - trial does not have PROs as primary outcome(s)	2. No	2. No	1. Yes, for (co)primary	6. Evidence review	realistic	4. NA		2. No	"2. Government, international agency, university","3. Foundation, special interest group"	Superiority	Frequentist
3580	2019	Diabetic Medicine	3.107	No	No	Supportive Care	IVR Intervention Group, Behavioral	b. USA	a. Clinical	b. Cluster randomized trial	1. Yes, one primary	1. Yes - PRO is primary or co-primary outcome	3. NA - trial does not have multiple co-primary outcomes	Yes	1. HRQoL or QoL	2. Functional status,3. Symptoms/symptom burden	4. No	1. Yes	1. Yes	1. Yes, for (co)primary	1. Anchor,2. Distribution	important	4. NA	0.12	1. Yes	"2. Government, international agency, university"	Superiority	Frequentist
4389	2018	Lancet	59.102	No	No	Treatment	Depo-Medrone, Drug; Wrist Splint, Device	c. UK	a. Clinical	a. Individually randomized trial (Skip Q12)	1. Yes, one primary	1. Yes - PRO is primary or co-primary outcome	3. NA - trial does not have multiple co-primary outcomes	Yes	3. Symptoms/symptom burden,2. Functional status	2. Functional status,3. Symptoms/symptom burden,4. Health behaviours,5. Patient experience,1. HRQoL or QoL,6. Other (specify)	4. No	2. No	2. No	1. Yes, for (co)primary	1. Anchor,6. Evidence review	realistic	4. NA		1. Yes	"3. Foundation, special interest group"	Superiority	Frequentist
7560	2018	Circulation. Genomic and Precision Medicine	4.06	No	No	Prevention	SLCO1B1*5 allele testing, results reported at randomization, Genetic; SLCO1B1*5 allele testing, results reported at end of study, Genetic; Genetic testing for SLCO1B1*5 allele, Genetic	b. USA	a. Clinical	a. Individually randomized trial (Skip Q12)	1. Yes, one primary	1. Yes - PRO is primary or co-primary outcome	3. NA - trial does not have multiple co-primary outcomes	Yes	4. Health behaviours	4. Health behaviours,6. Other (specify)	4. No	2. No	2. No	1. Yes, for (co)primary	10. Target difference not justified	N/A or unclear	4. NA		1. Yes	"2. Government, international agency, university",1. Industry	Superiority	Frequentist
7320	2018	Circulation. Cardiovascular Quality & Outcomes	4.378	No	No	Treatment	Motivational interviewing (MINT-TLC), Behavioral	b. USA	b. Public health	b. Cluster randomized trial	1. Yes, one primary	3. No - There are no PROs	3. NA - trial does not have multiple co-primary outcomes		7. NA - PROs not primary	7. NA - PROs not secondary	6. NA - trial does not have PROs as primary outcome(s)	1. Yes	1. Yes	1. Yes, for (co)primary	4. Standardized effect size	N/A or unclear	4. NA		2. No	"2. Government, international agency, university"	Superiority	Frequentist
2292	2019	Journal of Cardiovascular Medicine	1.427	No	No	Prevention	Education, Other	b. USA	a. Clinical	b. Cluster randomized trial	1. Yes, one primary	3. No - There are no PROs	3. NA - trial does not have multiple co-primary outcomes		7. NA - PROs not primary	7. NA - PROs not secondary	6. NA - trial does not have PROs as primary outcome(s)	2. No	2. No	1. Yes, for (co)primary	10. Target difference not justified	N/A or unclear	4. NA		2. No	1. Industry,"3. Foundation, special interest group"	Superiority	Frequentist
6964	2018	Journal of the American Board of Family Medicine: JABFM	2.511	No	No	Screening	Letter, Behavioral; Phone call, Behavioral	a. Canada	a. Clinical	a. Individually randomized trial (Skip Q12)	1. Yes, one primary	3. No - There are no PROs	3. NA - trial does not have multiple co-primary outcomes		7. NA - PROs not primary	7. NA - PROs not secondary	6. NA - trial does not have PROs as primary outcome(s)	2. No	2. No	1. Yes, for (co)primary	7. Pilot study or realistic difference	realistic	4. NA		2. No	"3. Foundation, special interest group"	Superiority	Frequentist
4144	2018	JAMA	51.273	No	Yes	Health Services Research	Pharmacist-led educational intervention, Behavioral	a. Canada	a. Clinical	b. Cluster randomized trial	1. Yes, one primary	2. Yes - PRO is secondary (not primary outcome)	3. NA - trial does not have multiple co-primary outcomes		7. NA - PROs not primary	5. Patient experience,6. Other (specify)	6. NA - trial does not have PROs as primary outcome(s)	2. No	2. No	1. Yes, for (co)primary	7. Pilot study or realistic difference	realistic	4. NA		2. No	"2. Government, international agency, university"	Superiority	Frequentist
2418	2019	European Journal of Cardio-Thoracic Surgery	3.847	No	No	Treatment	Suction is set to -2 cmH2O, Device; Suction is set to -10 cmH2O, Device	d. Other European Union (EU) country	a. Clinical	a. Individually randomized trial (Skip Q12)	1. Yes, one primary	3. No - There are no PROs	3. NA - trial does not have multiple co-primary outcomes		7. NA - PROs not primary	7. NA - PROs not secondary	6. NA - trial does not have PROs as primary outcome(s)	2. No	2. No	1. Yes, for (co)primary	10. Target difference not justified	important	4. NA		1. Yes	"2. Government, international agency, university","3. Foundation, special interest group"	Superiority	Frequentist
2487	2019	Journal of Pediatric Nursing	1.563	Yes	No	Prevention	PEWS - trigger tool, Other; RM - trigger tool, Other	d. Other European Union (EU) country	a. Clinical	a. Individually randomized trial (Skip Q12)	1. Yes, one primary	3. No - There are no PROs	3. NA - trial does not have multiple co-primary outcomes		7. NA - PROs not primary	7. NA - PROs not secondary	6. NA - trial does not have PROs as primary outcome(s)	2. No	2. No	1. Yes, for (co)primary	10. Target difference not justified	realistic	4. NA		2. No	"2. Government, international agency, university","3. Foundation, special interest group"	Superiority	Frequentist
2459	2019	European Journal of Heart Failure	13.965	No	No	Treatment	Educational website (in addition to usual care)., Other; Website and interactive platform with telemonitoring., Other	d. Other European Union (EU) country	a. Clinical	a. Individually randomized trial (Skip Q12)	1. Yes, one primary	1. Yes - PRO is primary or co-primary outcome	3. NA - trial does not have multiple co-primary outcomes	Yes	4. Health behaviours	1. HRQoL or QoL,6. Other (specify),5. Patient experience	4. No	2. No	2. No	1. Yes, for (co)primary	7. Pilot study or realistic difference	realistic	4. NA		2. No	"3. Foundation, special interest group"	Superiority	Frequentist
2623	2019	American Journal of Medicine	4.76	No	No	Treatment	Pharmacist-Led Intervention, Behavioral	b. USA	a. Clinical	b. Cluster randomized trial	2. Yes, two co-primaries	3. No - There are no PROs	2. No		7. NA - PROs not primary	7. NA - PROs not secondary	6. NA - trial does not have PROs as primary outcome(s)	2. No	2. No	1. Yes, for (co)primary	10. Target difference not justified	N/A or unclear	4. NA		2. No	"2. Government, international agency, university"	Superiority	Frequentist
2314	2019	Sports Medicine	7.583	No	No	Supportive Care	Football, Behavioral	d. Other European Union (EU) country	a. Clinical	a. Individually randomized trial (Skip Q12)	1. Yes, one primary	1. Yes - PRO is primary or co-primary outcome	3. NA - trial does not have multiple co-primary outcomes	Yes	1. HRQoL or QoL	4. Health behaviours,2. Functional status	4. No	1. Yes	1. Yes	1. Yes, for (co)primary	7. Pilot study or realistic difference,1. Anchor,2. Distribution	both	4. NA		2. No	"3. Foundation, special interest group"	Superiority	Frequentist
2648	2019	Lancet	59.102	No	No	Prevention	Intervention, Behavioral	d. Other European Union (EU) country	a. Clinical	a. Individually randomized trial (Skip Q12)	2. Yes, two co-primaries	2. Yes - PRO is secondary (not primary outcome)	2. No		7. NA - PROs not primary	4. Health behaviours	6. NA - trial does not have PROs as primary outcome(s)	2. No	2. No	1. Yes, for (co)primary	7. Pilot study or realistic difference	realistic	4. NA		1. Yes	"3. Foundation, special interest group","2. Government, international agency, university",4. Other (specify)	Superiority	Frequentist
2360	2019	Journal of the American Medical Informatics Association	4.292	No	No	Health Services Research	Standard tablet computer, Other; Enhanced tablet computer, Other	b. USA	a. Clinical	a. Individually randomized trial (Skip Q12)	1. Yes, one primary	1. Yes - PRO is primary or co-primary outcome	3. NA - trial does not have multiple co-primary outcomes	Yes	5. Patient experience	5. Patient experience,6. Other (specify)	4. No	2. No	2. No	1. Yes, for (co)primary	7. Pilot study or realistic difference	realistic	4. NA		2. No	"2. Government, international agency, university"	Superiority	Frequentist
2474	2018	Circulation	23.054	No	No	Health Services Research	mWELLCARE, Other; Usual Care, Other	f. Low or Middle Income Country (LMIC)	a. Clinical	b. Cluster randomized trial	2. Yes, two co-primaries	2. Yes - PRO is secondary (not primary outcome)	2. No		7. NA - PROs not primary	3. Symptoms/symptom burden,4. Health behaviours	6. NA - trial does not have PROs as primary outcome(s)	1. Yes	1. Yes	1. Yes, for (co)primary	6. Evidence review,7. Pilot study or realistic difference	realistic	4. NA		1. Yes	"3. Foundation, special interest group"	Superiority	Frequentist
2668	2018	BMC Health Services Research	1.932	No	No	Supportive Care	Patient education, Behavioral; Physical activity, Behavioral	g. Other developed	a. Clinical	a. Individually randomized trial (Skip Q12)	1. Yes, one primary	1. Yes - PRO is primary or co-primary outcome	3. NA - trial does not have multiple co-primary outcomes	Yes	6. Other (specify)	1. HRQoL or QoL,3. Symptoms/symptom burden,6. Other (specify),2. Functional status,4. Health behaviours	1. Yes, lit citation or explanation	2. No	2. No	1. Yes, for (co)primary	7. Pilot study or realistic difference	both	4. NA		1. Yes	"2. Government, international agency, university"	Superiority	Frequentist
2449	2019	Age & Ageing	4.511	No	Yes	Health Services Research	Exercise and education, Other	g. Other developed	a. Clinical	a. Individually randomized trial (Skip Q12)	1. Yes, one primary	1. Yes - PRO is primary or co-primary outcome	3. NA - trial does not have multiple co-primary outcomes		1. HRQoL or QoL	2. Functional status	4. No	2. No	2. No	1. Yes, for (co)primary	4. Standardized effect size	N/A or unclear	4. NA	0.5	1. Yes	"2. Government, international agency, university"	Superiority	Frequentist
4111	2019	JAMA	51.273	No	No	Health Services Research	Study voucher card, Other	b. USA	a. Clinical	b. Cluster randomized trial	2. Yes, two co-primaries	1. Yes - PRO is primary or co-primary outcome	1. Yes	Yes	4. Health behaviours	7. NA - PROs not secondary	4. No	2. No	2. No	1. Yes, for (co)primary	7. Pilot study or realistic difference	both	3. Both		2. No	1. Industry	Superiority	Frequentist
2137	2019	JMIR MHealth and UHealth	4.301	No	No	Supportive Care	BlueStar app, Device	a. Canada	a. Clinical	a. Individually randomized trial (Skip Q12)	1. Yes, one primary	2. Yes - PRO is secondary (not primary outcome)	3. NA - trial does not have multiple co-primary outcomes		7. NA - PROs not primary	1. HRQoL or QoL,6. Other (specify),4. Health behaviours,5. Patient experience	6. NA - trial does not have PROs as primary outcome(s)	2. No	2. No	1. Yes, for (co)primary	10. Target difference not justified	N/A or unclear	4. NA		1. Yes	5. Not specified	Superiority	Frequentist
3271	2018	JAMA Network Open	5.032	No	No	Health Services Research	Active choice, Behavioral; Social comparison feedback, Behavioral	b. USA	a. Clinical	b. Cluster randomized trial	1. Yes, one primary	3. No - There are no PROs	3. NA - trial does not have multiple co-primary outcomes		7. NA - PROs not primary	7. NA - PROs not secondary	6. NA - trial does not have PROs as primary outcome(s)	2. No	2. No	1. Yes, for (co)primary	10. Target difference not justified	N/A or unclear	4. NA		1. Yes	"2. Government, international agency, university"	Superiority	Frequentist
3210	2018	JAMA Network Open	5.032	No	No	Health Services Research	Medical Care + Chiropractic Care, Other; Conventional Medical Care Only, Other	b. USA	a. Clinical	a. Individually randomized trial (Skip Q12)	2. Yes, two co-primaries	1. Yes - PRO is primary or co-primary outcome	2. No		2. Functional status,3. Symptoms/symptom burden	5. Patient experience,4. Health behaviours,3. Symptoms/symptom burden	4. No	2. No	2. No	1. Yes, for (co)primary	5. Stakeholder/patient opinion	important	4. NA		1. Yes	"2. Government, international agency, university","3. Foundation, special interest group"	Superiority	Frequentist
1904	2018	JAMA Network Open	5.032	No	No	Health Services Research	Positive Activities (PA) Program, Behavioral; Attention Control (AC) Program, Behavioral	b. USA	a. Clinical	a. Individually randomized trial (Skip Q12)	2. Yes, two co-primaries	1. Yes - PRO is primary or co-primary outcome	2. No	Yes	2. Functional status,3. Symptoms/symptom burden	3. Symptoms/symptom burden	4. No	2. No	2. No	1. Yes, for (co)primary	10. Target difference not justified	N/A or unclear	4. NA		2. No	"2. Government, international agency, university"	Superiority	Frequentist
3190	2018	JAMA Network Open	5.032	No	No	Supportive Care	Collaborative Connected health, (CCH), Other; Control, Other	b. USA	a. Clinical	a. Individually randomized trial (Skip Q12)	1. Yes, one primary	1. Yes - PRO is primary or co-primary outcome	3. NA - trial does not have multiple co-primary outcomes		3. Symptoms/symptom burden	3. Symptoms/symptom burden	1. Yes, lit citation or explanation	2. No	2. No	1. Yes, for (co)primary	5. Stakeholder/patient opinion,6. Evidence review	important	4. NA	50%	1. Yes	"2. Government, international agency, university"	Equivalence	Frequentist
1921	2018	JAMA Network Open	5.032	No	No	Health Services Research	Facilitated Clinical Decision Support, Other; Clinical Decision Support Only, Other	b. USA	a. Clinical	b. Cluster randomized trial	1. Yes, one primary	3. No - There are no PROs	3. NA - trial does not have multiple co-primary outcomes		7. NA - PROs not primary	7. NA - PROs not secondary	6. NA - trial does not have PROs as primary outcome(s)	2. No	2. No	1. Yes, for (co)primary	7. Pilot study or realistic difference	realistic	4. NA		2. No	"2. Government, international agency, university"	Superiority	Frequentist
2375	2018	JAMA Network Open	5.032	No	No		Patient education to engage provider in hypertension treatment discussion, Behavioral; Financial incentive and health educator phone call, Behavioral	b. USA	a. Clinical	b. Cluster randomized trial	2. Yes, two co-primaries	3. No - There are no PROs	2. No		7. NA - PROs not primary	7. NA - PROs not secondary	6. NA - trial does not have PROs as primary outcome(s)	2. No	2. No	1. Yes, for (co)primary	10. Target difference not justified	N/A or unclear	4. NA		2. No	"2. Government, international agency, university"	Superiority	Frequentist
1794	2019	Implementation Science	4.525	No	No	Treatment	AD + Integrated Tobacco Order Set, Other	b. USA	a. Clinical	b. Cluster randomized trial	1. Yes, one primary	2. Yes - PRO is secondary (not primary outcome)	3. NA - trial does not have multiple co-primary outcomes		7. NA - PROs not primary	4. Health behaviours	6. NA - trial does not have PROs as primary outcome(s)	3. Unclear or other (specify)	1. Yes	3. No	13. No SS calc	N/A or unclear	4. NA		4. NA - no sample size calculation	"2. Government, international agency, university"	Superiority	Frequentist
2055	2019	BMC Medicine	8.285	No	No	Treatment	(Remote) Cognitive Behaviour Therapy, Behavioral	c. UK	a. Clinical	a. Individually randomized trial (Skip Q12)	1. Yes, one primary	1. Yes - PRO is primary or co-primary outcome	3. NA - trial does not have multiple co-primary outcomes		3. Symptoms/symptom burden	1. HRQoL or QoL,2. Functional status,3. Symptoms/symptom burden	4. No	1. Yes	2. No	1. Yes, for (co)primary	7. Pilot study or realistic difference	realistic	4. NA		1. Yes	"2. Government, international agency, university"	Superiority	Frequentist
1676	2019	BMJ	27.604	No	No	Treatment	Splint 3 weeks, Other; Cast 3 weeks, Other; Cast 6 weeks, Other	d. Other European Union (EU) country	a. Clinical	a. Individually randomized trial (Skip Q12)	1. Yes, one primary	1. Yes - PRO is primary or co-primary outcome	3. NA - trial does not have multiple co-primary outcomes		3. Symptoms/symptom burden	1. HRQoL or QoL,3. Symptoms/symptom burden	4. No	2. No	2. No	1. Yes, for (co)primary	7. Pilot study or realistic difference,5. Stakeholder/patient opinion	both	4. NA	0.22	1. Yes	"2. Government, international agency, university"	Non-inferiority	Frequentist
2189	2019	BMJ Open	2.376	No	No	Treatment	Programs of Care, Other	a. Canada	a. Clinical	a. Individually randomized trial (Skip Q12)	1. Yes, one primary	1. Yes - PRO is primary or co-primary outcome	3. NA - trial does not have multiple co-primary outcomes	Yes	2. Functional status	3. Symptoms/symptom burden,1. HRQoL or QoL	1. Yes, lit citation or explanation	2. No	2. No	1. Yes, for (co)primary	10. Target difference not justified	N/A or unclear	4. NA		1. Yes	1. Industry,"2. Government, international agency, university"	Superiority	Frequentist
2569	2019	Journal of the American Geriatrics Society	4.113	No	No	Treatment	Reduced exposure to anticholinergics, Behavioral; Reduced exposure to benzodiazepines, Procedure; Haloperidol, Drug; Usual care, Procedure	b. USA	a. Clinical	a. Individually randomized trial (Skip Q12)	2. Yes, two co-primaries	3. No - There are no PROs	2. No		7. NA - PROs not primary	7. NA - PROs not secondary	6. NA - trial does not have PROs as primary outcome(s)	2. No	2. No	1. Yes, for (co)primary	10. Target difference not justified	N/A or unclear	4. NA		1. Yes	"2. Government, international agency, university"	Superiority	Frequentist
1780	2019	Human vaccines & Immunotherapeutics	2.592	No	No	Health Services Research	Tailored educational materials, Behavioral; Untailored educational materials, Behavioral; Survey-only, Behavioral	b. USA	a. Clinical	a. Individually randomized trial (Skip Q12)	4. No or unclear	2. Yes - PRO is secondary (not primary outcome)	2. No		7. NA - PROs not primary	6. Other (specify)	6. NA - trial does not have PROs as primary outcome(s)	1. Yes	2. No	1. Yes, for (co)primary	10. Target difference not justified	N/A or unclear	4. NA		2. No	"2. Government, international agency, university"	Superiority	Frequentist
3256	2019	JAMA	51.273	No	No	Prevention	a pragmatic EEG-guided anesthetic protocol, Device	b. USA	a. Clinical	a. Individually randomized trial (Skip Q12)	1. Yes, one primary	2. Yes - PRO is secondary (not primary outcome)	3. NA - trial does not have multiple co-primary outcomes		7. NA - PROs not primary	1. HRQoL or QoL,2. Functional status	6. NA - trial does not have PROs as primary outcome(s)	2. No	2. No	1. Yes, for (co)primary	6. Evidence review	realistic	4. NA		2. No	"2. Government, international agency, university"	Superiority	Frequentist
2831	2019	Scandinavian Journal of Trauma, Resuscitation & Emergency Medicine	2.556	No	No	Treatment	Fentanyl, Other	d. Other European Union (EU) country	a. Clinical	b. Cluster randomized trial	1. Yes, one primary	1. Yes - PRO is primary or co-primary outcome	3. NA - trial does not have multiple co-primary outcomes	Yes	3. Symptoms/symptom burden	7. NA - PROs not secondary	4. No	2. No	2. No	1. Yes, for (co)primary	10. Target difference not justified	N/A or unclear	4. NA		2. No	"2. Government, international agency, university"	Superiority	Frequentist
2609	2019	BMJ	27.604	No	No	Treatment	Arthroscopic treatment of femoroacetabular impingement, Procedure; Physiotherapy and activity modification, Other	c. UK	a. Clinical	a. Individually randomized trial (Skip Q12)	1. Yes, one primary	1. Yes - PRO is primary or co-primary outcome	3. NA - trial does not have multiple co-primary outcomes		2. Functional status	1. HRQoL or QoL,2. Functional status,3. Symptoms/symptom burden	4. No	1. Yes	2. No	1. Yes, for (co)primary	4. Standardized effect size	important	4. NA		1. Yes	"2. Government, international agency, university"	Superiority	Frequentist
1880	2019	JAMA Network Open	5.032	No	No	Other	Incentive Change, Behavioral	b. USA	a. Clinical	b. Cluster randomized trial	1. Yes, one primary	3. No - There are no PROs	2. No		7. NA - PROs not primary	7. NA - PROs not secondary	6. NA - trial does not have PROs as primary outcome(s)	2. No	1. Yes	1. Yes, for (co)primary	10. Target difference not justified	N/A or unclear	4. NA		2. No	"3. Foundation, special interest group"	Superiority	Frequentist
2531	2019	Journal of General Internal Medicine	4.606	No	No	Health Services Research	Pre-Visit Tool, Behavioral; Usual Care Control, Behavioral	b. USA	a. Clinical	b. Cluster randomized trial	2. Yes, two co-primaries	1. Yes - PRO is primary or co-primary outcome	1. Yes		5. Patient experience	7. NA - PROs not secondary	4. No	2. No	2. No	1. Yes, for (co)primary	10. Target difference not justified	N/A or unclear	2. Clinical outcome		2. No	"2. Government, international agency, university"	Superiority	Frequentist
2469	2019	JAMA Network Open	5.032	No	No	Treatment	Clinic-based outpatient exercise group, Other; Community-based exercise group, Other	b. USA	a. Clinical	a. Individually randomized trial (Skip Q12)	1. Yes, one primary	1. Yes - PRO is primary or co-primary outcome	3. NA - trial does not have multiple co-primary outcomes	Yes	2. Functional status	5. Patient experience,4. Health behaviours,3. Symptoms/symptom burden,6. Other (specify),2. Functional status	4. No	1. Yes	1. Yes	1. Yes, for (co)primary	7. Pilot study or realistic difference	realistic	4. NA		1. Yes	"2. Government, international agency, university"	Superiority	Frequentist
2434	2019	Epilepsia	5.562	No	No	Treatment	Desiconnect, Behavioral; CAU, Other	d. Other European Union (EU) country	a. Clinical	a. Individually randomized trial (Skip Q12)	1. Yes, one primary	1. Yes - PRO is primary or co-primary outcome	3. NA - trial does not have multiple co-primary outcomes		3. Symptoms/symptom burden	3. Symptoms/symptom burden,1. HRQoL or QoL,2. Functional status	1. Yes, lit citation or explanation	1. Yes	1. Yes	1. Yes, for (co)primary	7. Pilot study or realistic difference,4. Standardized effect size	realistic	4. NA	0.5	1. Yes	1. Industry	Superiority	Frequentist
1864	2019	Age & Ageing	4.511	No	No	Supportive Care	Person-centered Care, Other; Optimised Treatment, Other	d. Other European Union (EU) country	a. Clinical	b. Cluster randomized trial	1. Yes, one primary	2. Yes - PRO is secondary (not primary outcome)	3. NA - trial does not have multiple co-primary outcomes		7. NA - PROs not primary	1. HRQoL or QoL	6. NA - trial does not have PROs as primary outcome(s)	2. No	2. No	3. No	13. No SS calc	N/A or unclear	4. NA		4. NA - no sample size calculation	"2. Government, international agency, university"	Superiority	Frequentist
3232	2019	JAMA	51.273	No	No	Health Services Research	PACT-HF Model, Other	a. Canada	a. Clinical	b. Cluster randomized trial	2. Yes, two co-primaries	2. Yes - PRO is secondary (not primary outcome)	2. No		7. NA - PROs not primary	1. HRQoL or QoL,5. Patient experience,6. Other (specify)	6. NA - trial does not have PROs as primary outcome(s)	1. Yes	1. Yes	1. Yes, for (co)primary	6. Evidence review	realistic	4. NA		2. No	1. Industry,"2. Government, international agency, university"	Superiority	Frequentist
1883	2019	Implementation Science	4.525	Yes	No	Health Services Research	Enhanced feedback, Behavioral; Standard feedback, Behavioral	f. Low or Middle Income Country (LMIC)	a. Clinical	b. Cluster randomized trial	1. Yes, one primary	3. No - There are no PROs	3. NA - trial does not have multiple co-primary outcomes		7. NA - PROs not primary	7. NA - PROs not secondary	6. NA - trial does not have PROs as primary outcome(s)	2. No	2. No	1. Yes, for (co)primary	10. Target difference not justified	N/A or unclear	4. NA		2. No	"3. Foundation, special interest group"	Superiority	Frequentist
1800	2019	Diabetes Care	15.27	No	No	Treatment	Integrated Behavioral Care, Behavioral	b. USA	a. Clinical	a. Individually randomized trial (Skip Q12)	1. Yes, one primary	2. Yes - PRO is secondary (not primary outcome)	3. NA - trial does not have multiple co-primary outcomes		7. NA - PROs not primary	2. Functional status,3. Symptoms/symptom burden,4. Health behaviours	6. NA - trial does not have PROs as primary outcome(s)	2. No	2. No	1. Yes, for (co)primary	4. Standardized effect size,7. Pilot study or realistic difference	realistic	4. NA		2. No	"2. Government, international agency, university"	Superiority	Frequentist
2059	2019	Lancet	59.102	No	No	Health Services Research	Arm 2: Decolonization, Drug	b. USA	a. Clinical	b. Cluster randomized trial	1. Yes, one primary	3. No - There are no PROs	3. NA - trial does not have multiple co-primary outcomes		7. NA - PROs not primary	7. NA - PROs not secondary	6. NA - trial does not have PROs as primary outcome(s)	2. No	2. No	1. Yes, for (co)primary	10. Target difference not justified	N/A or unclear	4. NA		2. No	"2. Government, international agency, university"	Superiority	Frequentist
2869	2019	New England Journal of Medicine	70.67	No	No	Health Services Research	Flexible Duty Hour Schedule, Behavioral	b. USA	a. Clinical	b. Cluster randomized trial	1. Yes, one primary	3. No - There are no PROs	3. NA - trial does not have multiple co-primary outcomes		7. NA - PROs not primary	7. NA - PROs not secondary	6. NA - trial does not have PROs as primary outcome(s)	2. No	3. Unclear or other (specify)	3. No	13. No SS calc	N/A or unclear	4. NA		4. NA - no sample size calculation	"2. Government, international agency, university","3. Foundation, special interest group"	Non-inferiority	Frequentist
2895	2019	New England Journal of Medicine	70.67	No	No	Prevention	Rifapentine (RPT), Drug; Isoniazid (INH), Drug; Pyridoxine (Vitamin B6), Dietary Supplement	h. Unclear	a. Clinical	a. Individually randomized trial (Skip Q12)	1. Yes, one primary	3. No - There are no PROs	3. NA - trial does not have multiple co-primary outcomes		7. NA - PROs not primary	7. NA - PROs not secondary	6. NA - trial does not have PROs as primary outcome(s)	2. No	2. No	1. Yes, for (co)primary	6. Evidence review	realistic	4. NA		1. Yes	"2. Government, international agency, university"	Non-inferiority	Frequentist
2462	2019	JAMA Network Open	5.032	No	No	Health Services Research	Low intensity, Other; Moderate intensity, Other; High intensity, Other	b. USA	a. Clinical	a. Individually randomized trial (Skip Q12)	1. Yes, one primary	3. No - There are no PROs	3. NA - trial does not have multiple co-primary outcomes		7. NA - PROs not primary	7. NA - PROs not secondary	6. NA - trial does not have PROs as primary outcome(s)	2. No	2. No	1. Yes, for (co)primary	10. Target difference not justified	N/A or unclear	4. NA		2. No	1. Industry	Superiority	Frequentist
1879	2019	JAMA Network Open	5.032	No	No	Screening	Financial Incentive, Other	b. USA	a. Clinical	a. Individually randomized trial (Skip Q12)	1. Yes, one primary	3. No - There are no PROs	3. NA - trial does not have multiple co-primary outcomes		7. NA - PROs not primary	7. NA - PROs not secondary	6. NA - trial does not have PROs as primary outcome(s)	2. No	2. No	1. Yes, for (co)primary	10. Target difference not justified	N/A or unclear	4. NA		2. No	"2. Government, international agency, university"	Superiority	Frequentist
2131	2019	The Lancet Global Health	15.873	No	No	Prevention	Congenital Syphilis Intervention Group, Behavioral	f. Low or Middle Income Country (LMIC)	a. Clinical	b. Cluster randomized trial	2. Yes, two co-primaries	3. No - There are no PROs	2. No		7. NA - PROs not primary	7. NA - PROs not secondary	6. NA - trial does not have PROs as primary outcome(s)	2. No	1. Yes	1. Yes, for (co)primary	10. Target difference not justified	N/A or unclear	4. NA		1. Yes	"3. Foundation, special interest group"	Superiority	Frequentist
1851	2019	JAMA	51.273	Yes	No	Treatment	Sustained Inflation, Procedure; Standard of Care, Procedure	a. Canada ,b. USA ,d. Other European Union (EU) country ,e. Australia or New Zealand,g. Other developed	a. Clinical	a. Individually randomized trial (Skip Q12)	1. Yes, one primary	3. No - There are no PROs	3. NA - trial does not have multiple co-primary outcomes		7. NA - PROs not primary	7. NA - PROs not secondary	6. NA - trial does not have PROs as primary outcome(s)	2. No	2. No	1. Yes, for (co)primary	7. Pilot study or realistic difference	realistic	4. NA		1. Yes	1. Industry,"2. Government, international agency, university"	Superiority	Frequentist
2024	2019	PLoS Medicine / Public Library of Science	11.048	No	No	Health Services Research	Enhanced CHW intervention, Other; Standard of care, Other	f. Low or Middle Income Country (LMIC)	b. Public health	b. Cluster randomized trial	2. Yes, two co-primaries	4. Unclear or other (specify)	2. No		7. NA - PROs not primary	7. NA - PROs not secondary	6. NA - trial does not have PROs as primary outcome(s)	2. No	1. Yes	1. Yes, for (co)primary	5. Stakeholder/patient opinion	important	4. NA		2. No	"3. Foundation, special interest group"	Superiority	Frequentist
